# Supplementary material for: miRNome and Functional Network Analysis of PGRMC1 Regulated miRNA Target Genes Identify Pathways and Biological Functions Associated With Triple Negative Breast Cancer
Source: Front Oncol. 2021 Jul 19;11:710337. doi: 10.3389/fonc.2021.710337 (PMC8327780; doi:10.3389/fonc.2021.710337)
Supplement: Supplementary file 3 [file Table_2.xlsx]

## Sheet: Sheet1
	ID	Accession	Target	TargetID	Experiment	Literature	Tissue
	hsa-mir-34a-5p	MIMAT0000255	ACTG1	71	CLASH	23622248	Unspecified
	hsa-mir-34a-5p	MIMAT0000255	ADARB1	104	Proteomics	21566225	Unspecified
	hsa-mir-34a-5p	MIMAT0000255	AP2A1	160	Proteomics	21566225	Unspecified
	hsa-mir-34a-5p	MIMAT0000255	AP2A2	161	Proteomics	21566225	Unspecified
	hsa-mir-34a-5p	MIMAT0000255	AP2B1	163	Proteomics	21566225	Unspecified
	hsa-mir-34a-5p	MIMAT0000255	JAG1	182	Flow//Immunoblot//In situ hybridization//Luciferase reporter assay//Microarray//qRT-PCR//Western blot	20351093|19398721|24307639	Unspecified
	hsa-mir-34a-5p	MIMAT0000255	AGTR1	185	Luciferase reporter assay//qRT-PCR//Western blot	28073349	Unspecified
	hsa-mir-34a-5p	MIMAT0000255	CRYBG1	202	Microarray//qRT-PCR	22815788	Unspecified
	hsa-mir-34a-5p	MIMAT0000255	AKT1	207	Flow//qRT-PCR//Western blot	27073535	Unspecified
	hsa-mir-34a-5p	MIMAT0000255	ALDH9A1	223	Proteomics	21566225	Unspecified
	hsa-mir-34a-5p	MIMAT0000255	AKR1B1	231	Proteomics	21566225	Unspecified
	hsa-mir-34a-5p	MIMAT0000255	ANK3	288	Immunocytochemistry//Luciferase reporter assay//Western blot	25623948	Unspecified
	hsa-mir-34a-5p	MIMAT0000255	ANXA4	307	Proteomics	21566225	Unspecified
	hsa-mir-34a-5p	MIMAT0000255	APAF1	317	PCR array	28097098	Unspecified
	hsa-mir-34a-5p	MIMAT0000255	APEH	327	Proteomics	21566225	Unspecified
	hsa-mir-34a-5p	MIMAT0000255	BIRC2	329	PCR array	28097098	Unspecified
	hsa-mir-34a-5p	MIMAT0000255	BIRC3	330	Microarray//Northern blot	17540599	Unspecified
	hsa-mir-34a-5p	MIMAT0000255	XIAP	331	PCR array	28097098	Unspecified
	hsa-mir-34a-5p	MIMAT0000255	BIRC5	332	Flow//Immunohistochemistry//Luciferase reporter assay//Microarray//PCR array//qRT-PCR//Western blot	23264087|24068565|25436980|26318298|28097098	Unspecified
	hsa-mir-34a-5p	MIMAT0000255	FASLG	356	PCR array	28097098	Unspecified
	hsa-mir-34a-5p	MIMAT0000255	AR	367	qRT-PCR//Western blot	23145211	Unspecified
	hsa-mir-34a-5p	MIMAT0000255	AREG	374	Microarray//qRT-PCR	22815788	Unspecified
	hsa-mir-34a-5p	MIMAT0000255	ARF6	382	Proteomics	21566225	Unspecified
	hsa-mir-34a-5p	MIMAT0000255	ARHGAP1	392	PAR-CLIP//Proteomics//Sequencing	21566225|20371350|23592263|21572407|27292025	Unspecified
	hsa-mir-34a-5p	MIMAT0000255	ARHGDIB	397	Luciferase reporter assay//Western blot	23349340	Unspecified
	hsa-mir-34a-5p	MIMAT0000255	ATP6V1E1	529	PAR-CLIP	27292025	Unspecified
	hsa-mir-34a-5p	MIMAT0000255	AXL	558	ChIP-seq//Luciferase reporter assay//Microarray//Proteomics//qRT-PCR//Reporter assay//Western blot	21814748|21566225|26667302|26287733	Unspecified
	hsa-mir-34a-5p	MIMAT0000255	BAG1	573	PCR array	28097098	Unspecified
	hsa-mir-34a-5p	MIMAT0000255	BAK1	578	PCR array	28097098	Unspecified
	hsa-mir-34a-5p	MIMAT0000255	BAX	581	Luciferase reporter assay//Western blot	27610823	Unspecified
	hsa-mir-34a-5p	MIMAT0000255	CCND1	595	Luciferase reporter assay//qRT-PCR//Reporter assay//Sequencing//Western blot	18406353|19461653|20309880|20371350|27220728	Unspecified
	hsa-mir-34a-5p	MIMAT0000255	BCL2	596	Flow//Immunoblot//Luciferase reporter assay//Microarray//Proteomics//qRT-PCR//QRTPCR//Reporter assay//Western blot	18803879|19683563|18505919|19461653|17914404|17656095|20598588|21399894|21566225|24565525|23862748|23292172|26802970|27939626|26406332|25910896	Unspecified
	hsa-mir-34a-5p	MIMAT0000255	BCL2A1	597	PCR array	28097098	Unspecified
	hsa-mir-34a-5p	MIMAT0000255	BCL2L1	598	PCR array	28097098	Unspecified
	hsa-mir-34a-5p	MIMAT0000255	BIK	638	PCR array	28097098	Unspecified
	hsa-mir-34a-5p	MIMAT0000255	BMP3	651	PAR-CLIP	21572407	Unspecified
	hsa-mir-34a-5p	MIMAT0000255	BMP7	655	Western blot	23226240	Unspecified
	hsa-mir-34a-5p	MIMAT0000255	BNIP2	663	PCR array	28097098	Unspecified
	hsa-mir-34a-5p	MIMAT0000255	BNIP3	664	PCR array	28097098	Unspecified
	hsa-mir-34a-5p	MIMAT0000255	BRCA1	672	Next Generation Sequencing (NGS)//qRT-PCR	26403328	Unspecified
	hsa-mir-34a-5p	MIMAT0000255	CACNB3	784	Immunocytochemistry//Luciferase reporter assay//Western blot	25623948	Unspecified
	hsa-mir-34a-5p	MIMAT0000255	CAD	790	Proteomics	21566225	Unspecified
	hsa-mir-34a-5p	MIMAT0000255	CALD1	800	Proteomics	21566225	Unspecified
	hsa-mir-34a-5p	MIMAT0000255	CAPG	822	Proteomics	21566225	Unspecified
	hsa-mir-34a-5p	MIMAT0000255	CAPN1	823	Proteomics	21566225	Unspecified
	hsa-mir-34a-5p	MIMAT0000255	CAPZB	832	Proteomics	21566225	Unspecified
	hsa-mir-34a-5p	MIMAT0000255	CASP1	834	PCR array	28097098	Unspecified
	hsa-mir-34a-5p	MIMAT0000255	CASP3	836	PCR array	28097098	Unspecified
	hsa-mir-34a-5p	MIMAT0000255	CASP6	839	PCR array	28097098	Unspecified
	hsa-mir-34a-5p	MIMAT0000255	CASP7	840	PCR array	28097098	Unspecified
	hsa-mir-34a-5p	MIMAT0000255	CASP8	841	PCR array	28097098	Unspecified
	hsa-mir-34a-5p	MIMAT0000255	CASP9	842	PCR array	28097098	Unspecified
	hsa-mir-34a-5p	MIMAT0000255	CASP10	843	PCR array	28097098	Unspecified
	hsa-mir-34a-5p	MIMAT0000255	CCND3	896	Western blot	18406353	Unspecified
	hsa-mir-34a-5p	MIMAT0000255	CD27	939	PCR array	28097098	Unspecified
	hsa-mir-34a-5p	MIMAT0000255	CD40	958	PCR array	28097098	Unspecified
	hsa-mir-34a-5p	MIMAT0000255	CD40LG	959	PCR array	28097098	Unspecified
	hsa-mir-34a-5p	MIMAT0000255	CD44	960	Flow//Immunohistochemistry//Luciferase reporter assay//qRT-PCR//Reporter assay//Western blot	21240262|24423412|25572695|27497057|26231042|25551284	Unspecified
	hsa-mir-34a-5p	MIMAT0000255	CD70	970	PCR array	28097098	Unspecified
	hsa-mir-34a-5p	MIMAT0000255	CDC5L	988	Proteomics	21566225	Unspecified
	hsa-mir-34a-5p	MIMAT0000255	2021-09-07	989	CLASH	23622248	Unspecified
	hsa-mir-34a-5p	MIMAT0000255	CDC20	991	CLASH//Proteomics	21566225|23622248	Unspecified
	hsa-mir-34a-5p	MIMAT0000255	CDC25A	993	Western blot	18406353	Unspecified
	hsa-mir-34a-5p	MIMAT0000255	CDC25C	995	Microarray	19461653	Unspecified
	hsa-mir-34a-5p	MIMAT0000255	CDK4	1019	Luciferase reporter assay//Microarray//qRT-PCR//Western blot	19461653|17914404|21240262|21128241|24504520	Unspecified
	hsa-mir-34a-5p	MIMAT0000255	CDK6	1021	Luciferase reporter assay//Microarray//PAR-CLIP//qRT-PCR//Reporter assay//Western blot	18406353|19461653|19584398|17914404|19773441|21240262|23035210|23592263	Unspecified
	hsa-mir-34a-5p	MIMAT0000255	CDKN1B	1027	PAR-CLIP	23446348	Unspecified
	hsa-mir-34a-5p	MIMAT0000255	CDKN2A	1029	Western blot	21128241	Unspecified
	hsa-mir-34a-5p	MIMAT0000255	CDKN2C	1031	qRT-PCR//Reporter assay	21128241	Unspecified
	hsa-mir-34a-5p	MIMAT0000255	CEBPB	1051	Luciferase reporter assay//Reporter assay	20598588	Unspecified
	hsa-mir-34a-5p	MIMAT0000255	CFL1	1072	Proteomics	21566225	Unspecified
	hsa-mir-34a-5p	MIMAT0000255	FOXN3	1112	PAR-CLIP	23592263|21572407	Unspecified
	hsa-mir-34a-5p	MIMAT0000255	CIDEA	1149	PCR array	28097098	Unspecified
	hsa-mir-34a-5p	MIMAT0000255	AP2M1	1173	Proteomics	21566225	Unspecified
	hsa-mir-34a-5p	MIMAT0000255	CLTB	1212	Proteomics	21566225	Unspecified
	hsa-mir-34a-5p	MIMAT0000255	CPT2	1376	Proteomics	21566225	Unspecified
	hsa-mir-34a-5p	MIMAT0000255	CRABP2	1382	PAR-CLIP	26701625	Unspecified
	hsa-mir-34a-5p	MIMAT0000255	CRYAA	1409	Proteomics	21566225	Unspecified
	hsa-mir-34a-5p	MIMAT0000255	CSE1L	1434	CLASH	23622248	Unspecified
	hsa-mir-34a-5p	MIMAT0000255	CSF1R	1436	Luciferase reporter assay//qRT-PCR	24198819	Unspecified
	hsa-mir-34a-5p	MIMAT0000255	CTNNB1	1499	Proteomics	21566225	Unspecified
	hsa-mir-34a-5p	MIMAT0000255	CYBB	1536	Western blot	24393844	Unspecified
	hsa-mir-34a-5p	MIMAT0000255	CYP51A1	1595	Proteomics	21566225	Unspecified
	hsa-mir-34a-5p	MIMAT0000255	DAPK1	1612	PCR array	28097098	Unspecified
	hsa-mir-34a-5p	MIMAT0000255	GADD45A	1647	PCR array	28097098	Unspecified
	hsa-mir-34a-5p	MIMAT0000255	DDX10	1662	Proteomics	21566225	Unspecified
	hsa-mir-34a-5p	MIMAT0000255	DFFA	1676	PCR array	28097098	Unspecified
	hsa-mir-34a-5p	MIMAT0000255	DGUOK	1716	Luciferase reporter assay	24147106	Unspecified
	hsa-mir-34a-5p	MIMAT0000255	DHCR7	1717	Proteomics	21566225	Unspecified
	hsa-mir-34a-5p	MIMAT0000255	2021-09-01	1731	Proteomics	21566225	Unspecified
	hsa-mir-34a-5p	MIMAT0000255	DOCK3	1795	Microarray//qRT-PCR	22815788	Unspecified
	hsa-mir-34a-5p	MIMAT0000255	RCAN1	1827	Immunohistochemistry//Luciferase reporter assay//qRT-PCR//Western blot	28292468	Unspecified
	hsa-mir-34a-5p	MIMAT0000255	DSP	1832	Proteomics	21566225	Unspecified
	hsa-mir-34a-5p	MIMAT0000255	DTYMK	1841	Proteomics	21566225	Unspecified
	hsa-mir-34a-5p	MIMAT0000255	DUT	1854	Proteomics	21566225	Unspecified
	hsa-mir-34a-5p	MIMAT0000255	E2F1	1869	Immunoblot//Immunohistochemistry//Luciferase reporter assay//qRT-PCR//Western blot	17875987|21128241|27704360|28293146	Unspecified
	hsa-mir-34a-5p	MIMAT0000255	E2F3	1871	Immunoblot//Immunohistochemistry//Immunoprecipitaion//Luciferase reporter assay//Microarray//PAR-CLIP//qRT-PCR//Western blot	17252019|19461653|17914404|17875987|17297439|20889924|20371350|23954321|23298779|26802970|28389657|25675046	Unspecified
	hsa-mir-34a-5p	MIMAT0000255	E2F5	1875	Microarray	19461653	Unspecified
	hsa-mir-34a-5p	MIMAT0000255	EFNB1	1947	PAR-CLIP//Proteomics	21566225|23592263	Unspecified
	hsa-mir-34a-5p	MIMAT0000255	EPHA2	1969	Proteomics	21566225	Unspecified
	hsa-mir-34a-5p	MIMAT0000255	EIF4G1	1981	Sequencing	20371350	Unspecified
	hsa-mir-34a-5p	MIMAT0000255	SERPINB1	1992	Proteomics	21566225	Unspecified
	hsa-mir-34a-5p	MIMAT0000255	EMP1	2012	Microarray//Northern blot	17540599	Unspecified
	hsa-mir-34a-5p	MIMAT0000255	CTTN	2017	Proteomics	21566225	Unspecified
	hsa-mir-34a-5p	MIMAT0000255	EPB41L2	2037	Proteomics	21566225	Unspecified
	hsa-mir-34a-5p	MIMAT0000255	EPHA5	2044	Luciferase reporter assay//Western blot	22079638	Unspecified
	hsa-mir-34a-5p	MIMAT0000255	ERBB2	2064	Luciferase reporter assay//Western blot	27813227	Unspecified
	hsa-mir-34a-5p	MIMAT0000255	EXT2	2132	CLASH	23622248	Unspecified
	hsa-mir-34a-5p	MIMAT0000255	ACSL1	2180	Proteomics//Reporter assay	21566225	Unspecified
	hsa-mir-34a-5p	MIMAT0000255	ACSL4	2182	Proteomics//Reporter assay	21566225	Unspecified
	hsa-mir-34a-5p	MIMAT0000255	FAH	2184	Proteomics	21566225	Unspecified
	hsa-mir-34a-5p	MIMAT0000255	FEN1	2237	Proteomics	21566225	Unspecified
	hsa-mir-34a-5p	MIMAT0000255	FH	2271	CLASH	23622248	Unspecified
	hsa-mir-34a-5p	MIMAT0000255	FKBP1B	2281	Luciferase reporter assay	26471303	Unspecified
	hsa-mir-34a-5p	MIMAT0000255	FLOT2	2319	Luciferase reporter assay//qRT-PCR//Western blot	25403318	Unspecified
	hsa-mir-34a-5p	MIMAT0000255	FOS	2353	ChIP//mRNA decay//qRT-PCR//Western blot	27513856	Unspecified
	hsa-mir-34a-5p	MIMAT0000255	FUT8	2530	Flow//Immunofluorescence//Immunohistochemistry//Luciferase reporter assay//qRT-PCR//Western blot	24130780|27533464	Unspecified
	hsa-mir-34a-5p	MIMAT0000255	GAS1	2619	Luciferase reporter assay//PAR-CLIP//qRT-PCR//Sequencing//Western blot	20371350|23446348|21572407|24220341	Unspecified
	hsa-mir-34a-5p	MIMAT0000255	GATA4	2626	CLASH	23622248	Unspecified
	hsa-mir-34a-5p	MIMAT0000255	GDI1	2664	Proteomics	21566225	Unspecified
	hsa-mir-34a-5p	MIMAT0000255	GFPT1	2673	Proteomics	21566225	Unspecified
	hsa-mir-34a-5p	MIMAT0000255	GFRA3	2676	Luciferase reporter assay//qRT-PCR//Western blot	28356515	Unspecified
	hsa-mir-34a-5p	MIMAT0000255	GMFB	2764	PAR-CLIP	22100165	Unspecified
	hsa-mir-34a-5p	MIMAT0000255	SFN	2810	Proteomics	21566225	Unspecified
	hsa-mir-34a-5p	MIMAT0000255	GPI	2821	Proteomics	21566225	Unspecified
	hsa-mir-34a-5p	MIMAT0000255	MKNK2	2872	PAR-CLIP	23592263	Unspecified
	hsa-mir-34a-5p	MIMAT0000255	GRB2	2885	Sequencing	20371350	Unspecified
	hsa-mir-34a-5p	MIMAT0000255	GRINA	2907	CLASH	23622248	Unspecified
	hsa-mir-34a-5p	MIMAT0000255	GRM7	2917	Proteomics//qRT-PCR//Reporter assay	20388499|21566225	Unspecified
	hsa-mir-34a-5p	MIMAT0000255	GTF3C1	2975	Proteomics	21566225	Unspecified
	hsa-mir-34a-5p	MIMAT0000255	GYG1	2992	Proteomics	21566225	Unspecified
	hsa-mir-34a-5p	MIMAT0000255	HIST1H1C	3006	Proteomics	21566225	Unspecified
	hsa-mir-34a-5p	MIMAT0000255	HIST1H1D	3007	Proteomics	21566225	Unspecified
	hsa-mir-34a-5p	MIMAT0000255	HIST1H1E	3008	Proteomics	21566225	Unspecified
	hsa-mir-34a-5p	MIMAT0000255	HIST1H1B	3009	Proteomics	21566225	Unspecified
	hsa-mir-34a-5p	MIMAT0000255	HIST1H2AE	3012	Proteomics	21566225	Unspecified
	hsa-mir-34a-5p	MIMAT0000255	HIST1H2AD	3013	Proteomics	21566225	Unspecified
	hsa-mir-34a-5p	MIMAT0000255	HIST1H2BB	3018	Proteomics	21566225	Unspecified
	hsa-mir-34a-5p	MIMAT0000255	H3F3A	3020	CLASH//Proteomics	21566225|23622248	Unspecified
	hsa-mir-34a-5p	MIMAT0000255	H3F3B	3021	Proteomics	21566225	Unspecified
	hsa-mir-34a-5p	MIMAT0000255	HIST1H1A	3024	Proteomics	21566225	Unspecified
	hsa-mir-34a-5p	MIMAT0000255	HSD17B10	3028	Sequencing	20371350	Unspecified
	hsa-mir-34a-5p	MIMAT0000255	HDAC1	3065	Flow//Immunofluorescence//Luciferase reporter assay//Microarray//Proteomics//qRT-PCR//Reporter assay//Western blot	21566225|23836017|26035691|28123637	Unspecified
	hsa-mir-34a-5p	MIMAT0000255	HDLBP	3069	Proteomics	21566225	Unspecified
	hsa-mir-34a-5p	MIMAT0000255	HMGB1	3146	Luciferase reporter assay//qRT-PCR//Western blot	27456356	Unspecified
	hsa-mir-34a-5p	MIMAT0000255	HNF4A	3172	Luciferase reporter assay//qRT-PCR//Western blot	20018894|22232426|23298640|27135744	Unspecified
	hsa-mir-34a-5p	MIMAT0000255	HNF4G	3174	Luciferase reporter assay//Western blot	25878394	Unspecified
	hsa-mir-34a-5p	MIMAT0000255	HOXA13	3209	PAR-CLIP	21572407	Unspecified
	hsa-mir-34a-5p	MIMAT0000255	HOXB8	3218	Sequencing	20371350	Unspecified
	hsa-mir-34a-5p	MIMAT0000255	HPRT1	3251	qRT-PCR	19696787	Unspecified
	hsa-mir-34a-5p	MIMAT0000255	HSPA1A	3303	Proteomics	21566225	Unspecified
	hsa-mir-34a-5p	MIMAT0000255	HSPA1B	3304	PAR-CLIP//Proteomics	21566225|20371350	Unspecified
	hsa-mir-34a-5p	MIMAT0000255	IFNB1	3456	ELISA//Luciferase reporter assay//qRT-PCR	20130213	Unspecified
	hsa-mir-34a-5p	MIMAT0000255	IGF1R	3480	CLASH	23622248	Unspecified
	hsa-mir-34a-5p	MIMAT0000255	IK	3550	Proteomics	21566225	Unspecified
	hsa-mir-34a-5p	MIMAT0000255	IL6R	3570	ChIP-seq//Immunofluorescence//Luciferase reporter assay//qRT-PCR//Western blot	24642471|25973020|26091352	Unspecified
	hsa-mir-34a-5p	MIMAT0000255	IL10	3586	PCR array	28097098	Unspecified
	hsa-mir-34a-5p	MIMAT0000255	IMPA1	3612	Luciferase reporter assay	22301190	Unspecified
	hsa-mir-34a-5p	MIMAT0000255	IMPDH1	3614	Proteomics	21566225	Unspecified
	hsa-mir-34a-5p	MIMAT0000255	IMPDH2	3615	Luciferase reporter assay	22301190	Unspecified
	hsa-mir-34a-5p	MIMAT0000255	INHBB	3625	Luciferase reporter assay//qRT-PCR//Western blot	24446339	Unspecified
	hsa-mir-34a-5p	MIMAT0000255	ITGA6	3655	Proteomics	21566225	Unspecified
	hsa-mir-34a-5p	MIMAT0000255	ITGB3	3690	HITS-CLIP	23824327	Unspecified
	hsa-mir-34a-5p	MIMAT0000255	JARID2	3720	HITS-CLIP	23313552	Unspecified
	hsa-mir-34a-5p	MIMAT0000255	KCNH1	3756	Western blot	23569431	Unspecified
	hsa-mir-34a-5p	MIMAT0000255	KCNH2	3757	Luciferase reporter assay//qRT-PCR//Western blot	25355491	Unspecified
	hsa-mir-34a-5p	MIMAT0000255	KIF2A	3796	Proteomics	21566225	Unspecified
	hsa-mir-34a-5p	MIMAT0000255	KIF5B	3799	Proteomics	21566225	Unspecified
	hsa-mir-34a-5p	MIMAT0000255	KIT	3815	Luciferase reporter assay//Western blot	24009080|27056900	Unspecified
	hsa-mir-34a-5p	MIMAT0000255	KLC1	3831	Proteomics	21566225	Unspecified
	hsa-mir-34a-5p	MIMAT0000255	KIF11	3832	Proteomics	21566225	Unspecified
	hsa-mir-34a-5p	MIMAT0000255	KPNA1	3836	Proteomics	21566225	Unspecified
	hsa-mir-34a-5p	MIMAT0000255	TNPO1	3842	Sequencing	20371350	Unspecified
	hsa-mir-34a-5p	MIMAT0000255	KTN1	3895	Proteomics	21566225	Unspecified
	hsa-mir-34a-5p	MIMAT0000255	L1CAM	3897	Luciferase reporter assay//qRT-PCR//Western blot	24497324	Unspecified
	hsa-mir-34a-5p	MIMAT0000255	STMN1	3925	Immunoblot//Immunofluorescence//Luciferase reporter assay//qRT-PCR	28275089	Unspecified
	hsa-mir-34a-5p	MIMAT0000255	LDHA	3939	Luciferase reporter assay//PAR-CLIP//Proteomics//Reporter assay	21566225|26902416|26701625	Unspecified
	hsa-mir-34a-5p	MIMAT0000255	ABLIM1	3983	Microarray//qRT-PCR	22815788	Unspecified
	hsa-mir-34a-5p	MIMAT0000255	LTA	4049	PCR array	28097098	Unspecified
	hsa-mir-34a-5p	MIMAT0000255	LTBR	4055	PCR array	28097098	Unspecified
	hsa-mir-34a-5p	MIMAT0000255	CAPRIN1	4076	Proteomics	21566225	Unspecified
	hsa-mir-34a-5p	MIMAT0000255	SMAD4	4089	Immunohistochemistry//Luciferase reporter assay//PAR-CLIP//qRT-PCR//Western blot	20371350|28348487|26077733	Unspecified
	hsa-mir-34a-5p	MIMAT0000255	MAGEA2	4101	Immunocytochemistry//Luciferase reporter assay//qRT-PCR//Western blot	21177782	Unspecified
	hsa-mir-34a-5p	MIMAT0000255	MAGEA3	4102	Immunocytochemistry//Luciferase reporter assay//qRT-PCR//Western blot	21177782	Unspecified
	hsa-mir-34a-5p	MIMAT0000255	MAGEA6	4105	Immunocytochemistry//Luciferase reporter assay//qRT-PCR//Western blot	21177782	Unspecified
	hsa-mir-34a-5p	MIMAT0000255	MAGEA12	4111	Immunohistochemistry//Luciferase reporter assay//qRT-PCR//Western blot	21177782	Unspecified
	hsa-mir-34a-5p	MIMAT0000255	MAP1B	4131	Proteomics	21566225	Unspecified
	hsa-mir-34a-5p	MIMAT0000255	MAP4	4134	PAR-CLIP//Proteomics	21566225|26701625	Unspecified
	hsa-mir-34a-5p	MIMAT0000255	MAZ	4150	PAR-CLIP	23592263|26701625	Unspecified
	hsa-mir-34a-5p	MIMAT0000255	MCL1	4170	PCR array	28097098	Unspecified
	hsa-mir-34a-5p	MIMAT0000255	MCM2	4171	Proteomics	21566225	Unspecified
	hsa-mir-34a-5p	MIMAT0000255	MCM3	4172	Proteomics	21566225	Unspecified
	hsa-mir-34a-5p	MIMAT0000255	MCM4	4173	Proteomics	21566225	Unspecified
	hsa-mir-34a-5p	MIMAT0000255	MCM5	4174	Proteomics	21566225	Unspecified
	hsa-mir-34a-5p	MIMAT0000255	MCM6	4175	Proteomics	21566225	Unspecified
	hsa-mir-34a-5p	MIMAT0000255	MCM7	4176	Proteomics	21566225	Unspecified
	hsa-mir-34a-5p	MIMAT0000255	MDM4	4194	Immunohistochemistry//Luciferase reporter assay//Microarray//PAR-CLIP//qRT-PCR//Western blot	19461653|22870278|24532687|23592263	Unspecified
	hsa-mir-34a-5p	MIMAT0000255	ME1	4199	Proteomics	21566225	Unspecified
	hsa-mir-34a-5p	MIMAT0000255	MAP3K1	4214	CLASH	23622248	Unspecified
	hsa-mir-34a-5p	MIMAT0000255	MET	4233	ELISA//Flow//Immunoblot//Immunofluorescence//Immunohistochemistry//In situ hybridization//Luciferase reporter assay//Northern blot//qRT-PCR//Western blot	19461653|18834857|19006648|19029026|20309880|19773441|22457788|22159222|21240262|23970470|24983493|26313360|26238271|27513895|28250026	Unspecified
	hsa-mir-34a-5p	MIMAT0000255	CXCL9	4283	Proteomics	21566225	Unspecified
	hsa-mir-34a-5p	MIMAT0000255	MKI67	4288	Proteomics	21566225	Unspecified
	hsa-mir-34a-5p	MIMAT0000255	MKLN1	4289	HITS-CLIP	22927820	Unspecified
	hsa-mir-34a-5p	MIMAT0000255	MAP3K9	4293	Luciferase reporter assay//qRT-PCR//Western blot	21266077	Unspecified
	hsa-mir-34a-5p	MIMAT0000255	MLLT1	4298	PAR-CLIP	26701625	Unspecified
	hsa-mir-34a-5p	MIMAT0000255	MMP7	4316	ELISA//qRT-PCR	24981249	Unspecified
	hsa-mir-34a-5p	MIMAT0000255	MOV10	4343	Sequencing	20371350	Unspecified
	hsa-mir-34a-5p	MIMAT0000255	MRE11	4361	Proteomics	21566225	Unspecified
	hsa-mir-34a-5p	MIMAT0000255	MST1	4485	Proteomics	21566225	Unspecified
	hsa-mir-34a-5p	MIMAT0000255	MTAP	4507	Proteomics//Sequencing	20371350|21566225	Unspecified
	hsa-mir-34a-5p	MIMAT0000255	MYB	4602	Luciferase reporter assay//Proteomics//qRT-PCR//Western blot	19584398|21566225|24504520	Unspecified
	hsa-mir-34a-5p	MIMAT0000255	MYC	4609	Luciferase reporter assay//Microarray//qRT-PCR//Reporter assay//Sequencing//TRAP//Western blot	19696787|21294122|21297663|22159222|20371350|24510096|25572695	Unspecified
	hsa-mir-34a-5p	MIMAT0000255	MYCN	4613	Immunohistochemistry//Luciferase reporter assay//qRT-PCR//Western blot	18504438|18505919|19461653|17297439|22020437|22662276|25348795|27764804|27836543	Unspecified
	hsa-mir-34a-5p	MIMAT0000255	MYO1C	4641	Proteomics	21566225	Unspecified
	hsa-mir-34a-5p	MIMAT0000255	NAIP	4671	PCR array	28097098	Unspecified
	hsa-mir-34a-5p	MIMAT0000255	NASP	4678	Proteomics	21566225	Unspecified
	hsa-mir-34a-5p	MIMAT0000255	DRG1	4733	Proteomics	21566225	Unspecified
	hsa-mir-34a-5p	MIMAT0000255	NEUROD2	4761	PAR-CLIP	23592263	Unspecified
	hsa-mir-34a-5p	MIMAT0000255	NFE2L1	4779	PAR-CLIP	26701625	Unspecified
	hsa-mir-34a-5p	MIMAT0000255	NFKB1	4790	PCR array	28097098	Unspecified
	hsa-mir-34a-5p	MIMAT0000255	CNOT4	4850	PAR-CLIP	23592263|21572407|20371350|27292025	Unspecified
	hsa-mir-34a-5p	MIMAT0000255	NOTCH1	4851	ELISA//Flow//Immunofluorescence//Immunohistochemistry//Luciferase reporter assay//Microarray//qRT-PCR//Western blot	14697198|19461653|20351093|19773441|17150773|22363487|22684561|23085450|23226240|22438124|23035210|23430952|28145431|26493107|28129650	Unspecified
	hsa-mir-34a-5p	MIMAT0000255	NOTCH2	4853	Immunoblot//Immunocytochemistry//Luciferase reporter assay//Microarray//qRT-PCR//Western blot	19773441|22363487	Unspecified
	hsa-mir-34a-5p	MIMAT0000255	YBX1	4904	CLASH	23622248	Unspecified
	hsa-mir-34a-5p	MIMAT0000255	NT5E	4907	Proteomics	21566225	Unspecified
	hsa-mir-34a-5p	MIMAT0000255	NUP98	4928	Proteomics	21566225	Unspecified
	hsa-mir-34a-5p	MIMAT0000255	NR4A2	4929	Luciferase reporter assay	27121375	Unspecified
	hsa-mir-34a-5p	MIMAT0000255	OPA1	4976	CLASH	23622248	Unspecified
	hsa-mir-34a-5p	MIMAT0000255	PAM	5066	qRT-PCR//Western blot	26406332	Unspecified
	hsa-mir-34a-5p	MIMAT0000255	PCBP2	5094	FACS//qRT-PCR//Western blot	24796666	Unspecified
	hsa-mir-34a-5p	MIMAT0000255	PDGFRA	5156	Immunoblot//In situ hybridization//Luciferase reporter assay//Microarray//qRT-PCR//Western blot	22479456|23805317|24837198|27302634	Unspecified
	hsa-mir-34a-5p	MIMAT0000255	PDGFRB	5159	In situ hybridization//Luciferase reporter assay//qRT-PCR//Western blot	23805317|24837198|26324236	Unspecified
	hsa-mir-34a-5p	MIMAT0000255	PER1	5187	qRT-PCR	25864118	Unspecified
	hsa-mir-34a-5p	MIMAT0000255	PIK3CG	5294	Flow//qRT-PCR//Western blot	27073535	Unspecified
	hsa-mir-34a-5p	MIMAT0000255	PKP2	5318	Proteomics	21566225	Unspecified
	hsa-mir-34a-5p	MIMAT0000255	PLCG1	5335	Proteomics	21566225	Unspecified
	hsa-mir-34a-5p	MIMAT0000255	PODXL	5420	PAR-CLIP	22012620	Unspecified
	hsa-mir-34a-5p	MIMAT0000255	POLD1	5424	Proteomics	21566225	Unspecified
	hsa-mir-34a-5p	MIMAT0000255	POLR2A	5430	Proteomics	21566225	Unspecified
	hsa-mir-34a-5p	MIMAT0000255	POU2F1	5451	Sequencing	20371350	Unspecified
	hsa-mir-34a-5p	MIMAT0000255	POU5F1	5460	Luciferase reporter assay//qRT-PCR//Western blot	24457968	Unspecified
	hsa-mir-34a-5p	MIMAT0000255	PPARA	5465	Luciferase reporter assay//qRT-PCR//Western blot	26330104	Unspecified
	hsa-mir-34a-5p	MIMAT0000255	PPP1CC	5501	Luciferase reporter assay//qRT-PCR//Western blot	26111201	Unspecified
	hsa-mir-34a-5p	MIMAT0000255	PPP1R10	5514	Luciferase reporter assay	23426265	Unspecified
	hsa-mir-34a-5p	MIMAT0000255	PPP3R1	5534	Sequencing	20371350	Unspecified
	hsa-mir-34a-5p	MIMAT0000255	PRIM1	5557	Proteomics	21566225	Unspecified
	hsa-mir-34a-5p	MIMAT0000255	PRKD1	5587	Luciferase reporter assay//qRT-PCR//Western blot	26895471	Unspecified
	hsa-mir-34a-5p	MIMAT0000255	MAPK3	5595	CLASH	23622248	Unspecified
	hsa-mir-34a-5p	MIMAT0000255	MAP2K1	5604	Luciferase reporter assay//Northern blot//qRT-PCR//Western blot	20299489	Unspecified
	hsa-mir-34a-5p	MIMAT0000255	THAP12	5612	Sequencing	20371350	Unspecified
	hsa-mir-34a-5p	MIMAT0000255	PTMS	5763	Proteomics	21566225	Unspecified
	hsa-mir-34a-5p	MIMAT0000255	PTPRJ	5795	PAR-CLIP	26701625	Unspecified
	hsa-mir-34a-5p	MIMAT0000255	PWP2	5822	Proteomics	21566225	Unspecified
	hsa-mir-34a-5p	MIMAT0000255	PYCR1	5831	Proteomics	21566225	Unspecified
	hsa-mir-34a-5p	MIMAT0000255	PYGB	5834	Proteomics	21566225	Unspecified
	hsa-mir-34a-5p	MIMAT0000255	QDPR	5860	Proteomics	21566225	Unspecified
	hsa-mir-34a-5p	MIMAT0000255	RAD51	5888	Luciferase reporter assay//qRT-PCR//Western blot	26670277	Unspecified
	hsa-mir-34a-5p	MIMAT0000255	RALB	5899	Proteomics	21566225	Unspecified
	hsa-mir-34a-5p	MIMAT0000255	RAP2A	5911	CLASH	23622248	Unspecified
	hsa-mir-34a-5p	MIMAT0000255	RBP2	5948	Luciferase reporter assay	27453008	Unspecified
	hsa-mir-34a-5p	MIMAT0000255	RCN1	5954	Proteomics	21566225	Unspecified
	hsa-mir-34a-5p	MIMAT0000255	RPL37	6167	CLASH	23622248	Unspecified
	hsa-mir-34a-5p	MIMAT0000255	RPS2	6187	CLASH	23622248	Unspecified
	hsa-mir-34a-5p	MIMAT0000255	RPS7	6201	CLASH	23622248	Unspecified
	hsa-mir-34a-5p	MIMAT0000255	RRAS	6237	Sequencing	20371350	Unspecified
	hsa-mir-34a-5p	MIMAT0000255	RRBP1	6238	Proteomics	21566225	Unspecified
	hsa-mir-34a-5p	MIMAT0000255	RRM2	6241	Proteomics	21566225	Unspecified
	hsa-mir-34a-5p	MIMAT0000255	RSU1	6251	Proteomics	21566225	Unspecified
	hsa-mir-34a-5p	MIMAT0000255	SORT1	6272	Proteomics	21566225	Unspecified
	hsa-mir-34a-5p	MIMAT0000255	S100A2	6273	Proteomics	21566225	Unspecified
	hsa-mir-34a-5p	MIMAT0000255	S100P	6286	qRT-PCR	25556547	Unspecified
	hsa-mir-34a-5p	MIMAT0000255	SAA1	6288	Proteomics	21566225	Unspecified
	hsa-mir-34a-5p	MIMAT0000255	CCL22	6367	Luciferase reporter assay//PAR-CLIP	22975373|23592263	Unspecified
	hsa-mir-34a-5p	MIMAT0000255	SHMT1	6470	PAR-CLIP	23592263|22012620|27292025	Unspecified
	hsa-mir-34a-5p	MIMAT0000255	SKI	6497	PAR-CLIP	26701625	Unspecified
	hsa-mir-34a-5p	MIMAT0000255	SLC1A5	6510	Proteomics	21566225	Unspecified
	hsa-mir-34a-5p	MIMAT0000255	SLC2A3	6515	Proteomics	21566225	Unspecified
	hsa-mir-34a-5p	MIMAT0000255	SLC4A2	6522	PAR-CLIP	23592263	Unspecified
	hsa-mir-34a-5p	MIMAT0000255	SMARCA4	6597	Proteomics	21566225	Unspecified
	hsa-mir-34a-5p	MIMAT0000255	SMARCC1	6599	Proteomics	21566225	Unspecified
	hsa-mir-34a-5p	MIMAT0000255	SMARCC2	6601	Proteomics	21566225	Unspecified
	hsa-mir-34a-5p	MIMAT0000255	SNAI1	6615	Luciferase reporter assay//qRT-PCR//Western blot	22134354|28145431	Unspecified
	hsa-mir-34a-5p	MIMAT0000255	SNRPA1	6627	CLASH	23622248	Unspecified
	hsa-mir-34a-5p	MIMAT0000255	SNTB2	6645	CLASH	23622248	Unspecified
	hsa-mir-34a-5p	MIMAT0000255	SON	6651	CLASH	23622248	Unspecified
	hsa-mir-34a-5p	MIMAT0000255	SOX2	6657	Luciferase reporter assay//Western blot	22020437	Unspecified
	hsa-mir-34a-5p	MIMAT0000255	SPAM1	6677	PAR-CLIP	23592263	Unspecified
	hsa-mir-34a-5p	MIMAT0000255	SPI1	6688	Luciferase reporter assay//Reporter assay	20598588	Unspecified
	hsa-mir-34a-5p	MIMAT0000255	SPTAN1	6709	Proteomics	21566225	Unspecified
	hsa-mir-34a-5p	MIMAT0000255	SPTBN1	6711	Proteomics	21566225	Unspecified
	hsa-mir-34a-5p	MIMAT0000255	SRC	6714	Immunoblot//Immunoprecipitaion//Luciferase reporter assay//qRT-PCR//Western blot	23790975|23533633|26676753	Unspecified
	hsa-mir-34a-5p	MIMAT0000255	SSX5	6758	HITS-CLIP	23824327	Unspecified
	hsa-mir-34a-5p	MIMAT0000255	STAT1	6772	Proteomics	21566225	Unspecified
	hsa-mir-34a-5p	MIMAT0000255	HSPA13	6782	PAR-CLIP	21572407	Unspecified
	hsa-mir-34a-5p	MIMAT0000255	STX1A	6804	Luciferase reporter assay//Western blot	22160687	Unspecified
	hsa-mir-34a-5p	MIMAT0000255	SUPT5H	6829	Proteomics	21566225	Unspecified
	hsa-mir-34a-5p	MIMAT0000255	SURF4	6836	Proteomics	21566225	Unspecified
	hsa-mir-34a-5p	MIMAT0000255	VAMP2	6844	Luciferase reporter assay	14697198	Unspecified
	hsa-mir-34a-5p	MIMAT0000255	SYT1	6857	Luciferase reporter assay//Western blot	22160687	Unspecified
	hsa-mir-34a-5p	MIMAT0000255	MAP3K7	6885	Sequencing	20371350	Unspecified
	hsa-mir-34a-5p	MIMAT0000255	TCF7	6932	Immunohistochemistry//Luciferase reporter assay//qRT-PCR//Western blot	25436980	Unspecified
	hsa-mir-34a-5p	MIMAT0000255	TCOF1	6949	Proteomics	21566225	Unspecified
	hsa-mir-34a-5p	MIMAT0000255	PPP1R11	6992	PAR-CLIP	27292025	Unspecified
	hsa-mir-34a-5p	MIMAT0000255	TFAM	7019	CLASH	23622248	Unspecified
	hsa-mir-34a-5p	MIMAT0000255	TFRC	7037	Proteomics	21566225	Unspecified
	hsa-mir-34a-5p	MIMAT0000255	TGFBR2	7048	PAR-CLIP	22012620	Unspecified
	hsa-mir-34a-5p	MIMAT0000255	TGM2	7052	Proteomics	21566225	Unspecified
	hsa-mir-34a-5p	MIMAT0000255	TLE3	7090	CLASH	23622248	Unspecified
	hsa-mir-34a-5p	MIMAT0000255	TNF	7124	PCR array	28097098	Unspecified
	hsa-mir-34a-5p	MIMAT0000255	TNFRSF1A	7132	PCR array	28097098	Unspecified
	hsa-mir-34a-5p	MIMAT0000255	TP53	7157	Flow//Immunoblot//Immunocytochemistry//Immunohistochemistry//Luciferase reporter assay//Microarray//Next Generation Sequencing (NGS)//Northern blot//qRT-PCR//QRTPCR//Western blot	23292869|26406332|26403328|26177460	Unspecified
	hsa-mir-34a-5p	MIMAT0000255	TP53BP2	7159	PCR array	28097098	Unspecified
	hsa-mir-34a-5p	MIMAT0000255	TP73	7161	PCR array	28097098	Unspecified
	hsa-mir-34a-5p	MIMAT0000255	TPD52	7163	Proteomics//Sequencing	20371350|21566225	Unspecified
	hsa-mir-34a-5p	MIMAT0000255	TPM1	7168	Proteomics	21566225	Unspecified
	hsa-mir-34a-5p	MIMAT0000255	TRAF2	7186	PCR array	28097098	Unspecified
	hsa-mir-34a-5p	MIMAT0000255	TRAF3	7187	PCR array	28097098	Unspecified
	hsa-mir-34a-5p	MIMAT0000255	CCT3	7203	CLASH	23622248	Unspecified
	hsa-mir-34a-5p	MIMAT0000255	TSN	7247	PAR-CLIP//Proteomics	21566225|23592263|20371350	Unspecified
	hsa-mir-34a-5p	MIMAT0000255	TXNRD1	7296	Proteomics	21566225	Unspecified
	hsa-mir-34a-5p	MIMAT0000255	TYMS	7298	Proteomics	21566225	Unspecified
	hsa-mir-34a-5p	MIMAT0000255	ZRSR1	7310	PAR-CLIP	23446348|20371350	Unspecified
	hsa-mir-34a-5p	MIMAT0000255	UBP1	7342	Sequencing	20371350	Unspecified
	hsa-mir-34a-5p	MIMAT0000255	UCK2	7371	Proteomics	21566225	Unspecified
	hsa-mir-34a-5p	MIMAT0000255	VCL	7414	Proteomics	21566225	Unspecified
	hsa-mir-34a-5p	MIMAT0000255	VEGFA	7422	ELISA//Luciferase reporter assay	18320040	Unspecified
	hsa-mir-34a-5p	MIMAT0000255	WNT1	7471	Flow//Immunoblot//Luciferase reporter assay//Microarray//qRT-PCR//Western blot	19336450|19398721|28199987	Unspecified
	hsa-mir-34a-5p	MIMAT0000255	XBP1P1	7495	PAR-CLIP	23446348|20371350	Unspecified
	hsa-mir-34a-5p	MIMAT0000255	XRCC1	7515	Proteomics	21566225	Unspecified
	hsa-mir-34a-5p	MIMAT0000255	YY1	7528	Flow//Luciferase reporter assay//Proteomics//qRT-PCR//Reporter assay//Western blot	21182263|21566225|24970812|25954903	Unspecified
	hsa-mir-34a-5p	MIMAT0000255	ZAP70	7535	Immunoblot//Luciferase reporter assay//Proteomics	21205967|21566225	Unspecified
	hsa-mir-34a-5p	MIMAT0000255	BAG6	7917	Proteomics	21566225	Unspecified
	hsa-mir-34a-5p	MIMAT0000255	AIMP2	7965	Proteomics	21566225	Unspecified
	hsa-mir-34a-5p	MIMAT0000255	SHOC2	8036	PAR-CLIP	23446348	Unspecified
	hsa-mir-34a-5p	MIMAT0000255	FOSL1	8061	Immunoblot//Immunoprecipitaion//Luciferase reporter assay//PAR-CLIP//qRT-PCR//Western blot	22198213|23001043|26701625	Unspecified
	hsa-mir-34a-5p	MIMAT0000255	KMT2D	8085	PAR-CLIP//Proteomics	21566225|23592263|26701625	Unspecified
	hsa-mir-34a-5p	MIMAT0000255	FXR1	8087	Proteomics	21566225	Unspecified
	hsa-mir-34a-5p	MIMAT0000255	HMGA2	8091	Microarray	19461653	Unspecified
	hsa-mir-34a-5p	MIMAT0000255	GDF5	8200	Luciferase reporter assay	27385596	Unspecified
	hsa-mir-34a-5p	MIMAT0000255	UBL4A	8266	PAR-CLIP	23446348	Unspecified
	hsa-mir-34a-5p	MIMAT0000255	HIST3H3	8290	Proteomics	21566225	Unspecified
	hsa-mir-34a-5p	MIMAT0000255	HIST1H4I	8294	Proteomics	21566225	Unspecified
	hsa-mir-34a-5p	MIMAT0000255	AXIN2	8313	Luciferase reporter assay	19336450	Unspecified
	hsa-mir-34a-5p	MIMAT0000255	HIST1H2AI	8329	Proteomics	21566225	Unspecified
	hsa-mir-34a-5p	MIMAT0000255	HIST1H2AK	8330	Proteomics	21566225	Unspecified
	hsa-mir-34a-5p	MIMAT0000255	HIST1H2AJ	8331	Proteomics	21566225	Unspecified
	hsa-mir-34a-5p	MIMAT0000255	HIST1H2AL	8332	Proteomics	21566225	Unspecified
	hsa-mir-34a-5p	MIMAT0000255	HIST1H2AC	8334	Proteomics	21566225	Unspecified
	hsa-mir-34a-5p	MIMAT0000255	HIST1H2AB	8335	Proteomics	21566225	Unspecified
	hsa-mir-34a-5p	MIMAT0000255	HIST1H2AM	8336	Proteomics	21566225	Unspecified
	hsa-mir-34a-5p	MIMAT0000255	HIST2H2AA3	8337	Proteomics	21566225	Unspecified
	hsa-mir-34a-5p	MIMAT0000255	HIST2H2AC	8338	Proteomics	21566225	Unspecified
	hsa-mir-34a-5p	MIMAT0000255	HIST1H2BE	8344	Proteomics	21566225	Unspecified
	hsa-mir-34a-5p	MIMAT0000255	HIST1H2BO	8348	Proteomics	21566225	Unspecified
	hsa-mir-34a-5p	MIMAT0000255	HIST2H2BE	8349	Proteomics	21566225	Unspecified
	hsa-mir-34a-5p	MIMAT0000255	HIST1H3A	8350	Proteomics	21566225	Unspecified
	hsa-mir-34a-5p	MIMAT0000255	HIST1H3D	8351	Proteomics	21566225	Unspecified
	hsa-mir-34a-5p	MIMAT0000255	HIST1H3C	8352	Proteomics	21566225	Unspecified
	hsa-mir-34a-5p	MIMAT0000255	HIST1H3E	8353	Proteomics	21566225	Unspecified
	hsa-mir-34a-5p	MIMAT0000255	HIST1H3I	8354	Proteomics	21566225	Unspecified
	hsa-mir-34a-5p	MIMAT0000255	HIST1H3G	8355	Proteomics	21566225	Unspecified
	hsa-mir-34a-5p	MIMAT0000255	HIST1H3J	8356	Proteomics	21566225	Unspecified
	hsa-mir-34a-5p	MIMAT0000255	HIST1H3H	8357	Proteomics	21566225	Unspecified
	hsa-mir-34a-5p	MIMAT0000255	HIST1H3B	8358	Proteomics	21566225	Unspecified
	hsa-mir-34a-5p	MIMAT0000255	HIST1H4A	8359	Proteomics	21566225	Unspecified
	hsa-mir-34a-5p	MIMAT0000255	HIST1H4D	8360	Proteomics	21566225	Unspecified
	hsa-mir-34a-5p	MIMAT0000255	HIST1H4F	8361	Proteomics	21566225	Unspecified
	hsa-mir-34a-5p	MIMAT0000255	HIST1H4K	8362	Proteomics	21566225	Unspecified
	hsa-mir-34a-5p	MIMAT0000255	HIST1H4J	8363	Proteomics	21566225	Unspecified
	hsa-mir-34a-5p	MIMAT0000255	HIST1H4C	8364	Proteomics	21566225	Unspecified
	hsa-mir-34a-5p	MIMAT0000255	HIST1H4H	8365	Proteomics	21566225	Unspecified
	hsa-mir-34a-5p	MIMAT0000255	HIST1H4B	8366	Proteomics	21566225	Unspecified
	hsa-mir-34a-5p	MIMAT0000255	HIST1H4E	8367	Proteomics	21566225	Unspecified
	hsa-mir-34a-5p	MIMAT0000255	HIST1H4L	8368	Proteomics	21566225	Unspecified
	hsa-mir-34a-5p	MIMAT0000255	HIST2H4A	8370	Proteomics	21566225	Unspecified
	hsa-mir-34a-5p	MIMAT0000255	DYRK3	8444	PAR-CLIP	23592263	Unspecified
	hsa-mir-34a-5p	MIMAT0000255	HIRIP3	8479	PAR-CLIP	23592263	Unspecified
	hsa-mir-34a-5p	MIMAT0000255	RAE1	8480	Proteomics	21566225	Unspecified
	hsa-mir-34a-5p	MIMAT0000255	DGKZ	8525	Flow	28008152	Unspecified
	hsa-mir-34a-5p	MIMAT0000255	DEGS1	8560	CLASH	23622248	Unspecified
	hsa-mir-34a-5p	MIMAT0000255	PDXK	8566	PAR-CLIP	26701625	Unspecified
	hsa-mir-34a-5p	MIMAT0000255	AKR7A2	8574	Proteomics	21566225	Unspecified
	hsa-mir-34a-5p	MIMAT0000255	NCOA1	8648	Microarray//qRT-PCR	22815788	Unspecified
	hsa-mir-34a-5p	MIMAT0000255	NUMB	8650	Luciferase reporter assay	26849305	Unspecified
	hsa-mir-34a-5p	MIMAT0000255	BECN1	8678	Flow//Immunofluorescence//In situ hybridization//qRT-PCR//Western blot	26313360	Unspecified
	hsa-mir-34a-5p	MIMAT0000255	PEA15	8682	Microarray//qRT-PCR//Sequencing//Western blot	20388802|20371350|22815788	Unspecified
	hsa-mir-34a-5p	MIMAT0000255	CDC23	8697	Proteomics	21566225	Unspecified
	hsa-mir-34a-5p	MIMAT0000255	B4GALT3	8703	Sequencing	20371350	Unspecified
	hsa-mir-34a-5p	MIMAT0000255	SNX3	8724	CLASH	23622248	Unspecified
	hsa-mir-34a-5p	MIMAT0000255	CRADD	8738	PCR array	28097098	Unspecified
	hsa-mir-34a-5p	MIMAT0000255	HRK	8739	PCR array	28097098	Unspecified
	hsa-mir-34a-5p	MIMAT0000255	RIPK2	8767	PCR array	28097098	Unspecified
	hsa-mir-34a-5p	MIMAT0000255	TNFRSF6B	8771	Microarray//Northern blot	17540599	Unspecified
	hsa-mir-34a-5p	MIMAT0000255	SNAP23	8773	Proteomics	21566225	Unspecified
	hsa-mir-34a-5p	MIMAT0000255	TNFRSF10B	8795	PCR array	28097098	Unspecified
	hsa-mir-34a-5p	MIMAT0000255	TNFRSF10A	8797	PCR array	28097098	Unspecified
	hsa-mir-34a-5p	MIMAT0000255	CFLAR	8837	PCR array	28097098	Unspecified
	hsa-mir-34a-5p	MIMAT0000255	MTMR2	8898	CLASH	23622248	Unspecified
	hsa-mir-34a-5p	MIMAT0000255	BCL10	8915	PCR array	28097098	Unspecified
	hsa-mir-34a-5p	MIMAT0000255	HIST1H3F	8968	Proteomics	21566225	Unspecified
	hsa-mir-34a-5p	MIMAT0000255	HIST1H2AG	8969	Proteomics	21566225	Unspecified
	hsa-mir-34a-5p	MIMAT0000255	HIST1H2BJ	8970	Proteomics	21566225	Unspecified
	hsa-mir-34a-5p	MIMAT0000255	H1FX	8971	Proteomics	21566225	Unspecified
	hsa-mir-34a-5p	MIMAT0000255	NOL3	8996	PCR array	28097098	Unspecified
	hsa-mir-34a-5p	MIMAT0000255	MAP3K14	9020	qRT-PCR	25864118	Unspecified
	hsa-mir-34a-5p	MIMAT0000255	AIP	9049	Immunohistochemistry//Luciferase reporter assay//qRT-PCR	25658813	Unspecified
	hsa-mir-34a-5p	MIMAT0000255	AIFM1	9131	PCR array	28097098	Unspecified
	hsa-mir-34a-5p	MIMAT0000255	CCNE2	9134	Luciferase reporter assay//Microarray//PAR-CLIP//Western blot	19461653|17914404|23446348	Unspecified
	hsa-mir-34a-5p	MIMAT0000255	SYNGR2	9144	PAR-CLIP	23592263	Unspecified
	hsa-mir-34a-5p	MIMAT0000255	DDX21	9188	Proteomics	21566225	Unspecified
	hsa-mir-34a-5p	MIMAT0000255	ZMYM4	9202	PAR-CLIP	27292025	Unspecified
	hsa-mir-34a-5p	MIMAT0000255	LRRFIP1	9208	Proteomics	21566225	Unspecified
	hsa-mir-34a-5p	MIMAT0000255	MTA2	9219	Proteomics//Reporter assay//Western blot	21566225|20018894	Unspecified
	hsa-mir-34a-5p	MIMAT0000255	MAGI1	9223	Sequencing	20371350	Unspecified
	hsa-mir-34a-5p	MIMAT0000255	CYTH3	9265	PAR-CLIP	23592263	Unspecified
	hsa-mir-34a-5p	MIMAT0000255	CYTH1	9267	CLASH	23622248	Unspecified
	hsa-mir-34a-5p	MIMAT0000255	KLF4	9314	Immunoblot//Luciferase reporter assay//qRT-PCR//Western blot	24415058|25362853|28250026	Unspecified
	hsa-mir-34a-5p	MIMAT0000255	GTF3C3	9330	Proteomics	21566225	Unspecified
	hsa-mir-34a-5p	MIMAT0000255	B4GALT5	9334	Microarray//qRT-PCR	22815788	Unspecified
	hsa-mir-34a-5p	MIMAT0000255	TJP2	9414	Proteomics	21566225	Unspecified
	hsa-mir-34a-5p	MIMAT0000255	ATG5	9474	Flow//Immunofluorescence//In situ hybridization//qRT-PCR//Western blot	26313360	Unspecified
	hsa-mir-34a-5p	MIMAT0000255	SLC4A7	9497	Sequencing	20371350	Unspecified
	hsa-mir-34a-5p	MIMAT0000255	BAG3	9531	PCR array	28097098	Unspecified
	hsa-mir-34a-5p	MIMAT0000255	CLOCK	9575	Microarray//qRT-PCR	22815788	Unspecified
	hsa-mir-34a-5p	MIMAT0000255	KDM4A	9682	Immunohistochemistry//Luciferase reporter assay//qRT-PCR//Western blot	24802408	Unspecified
	hsa-mir-34a-5p	MIMAT0000255	UBE3C	9690	Proteomics	21566225	Unspecified
	hsa-mir-34a-5p	MIMAT0000255	BCLAF1	9774	Proteomics	21566225	Unspecified
	hsa-mir-34a-5p	MIMAT0000255	DHX38	9785	Proteomics	21566225	Unspecified
	hsa-mir-34a-5p	MIMAT0000255	CKAP5	9793	Proteomics	21566225	Unspecified
	hsa-mir-34a-5p	MIMAT0000255	TATDN2	9797	Sequencing	20371350	Unspecified
	hsa-mir-34a-5p	MIMAT0000255	RNF40	9810	Proteomics	21566225	Unspecified
	hsa-mir-34a-5p	MIMAT0000255	CTIF	9811	PAR-CLIP	22100165	Unspecified
	hsa-mir-34a-5p	MIMAT0000255	RGP1	9827	PAR-CLIP	23592263	Unspecified
	hsa-mir-34a-5p	MIMAT0000255	ZNF623	9831	PAR-CLIP	23446348	Unspecified
	hsa-mir-34a-5p	MIMAT0000255	ZEB2	9839	TRAP	24510096	Unspecified
	hsa-mir-34a-5p	MIMAT0000255	CEP170	9859	CLASH	23622248	Unspecified
	hsa-mir-34a-5p	MIMAT0000255	WASHC5	9897	Sequencing	20371350	Unspecified
	hsa-mir-34a-5p	MIMAT0000255	G3BP2	9908	Proteomics	21566225	Unspecified
	hsa-mir-34a-5p	MIMAT0000255	MFN2	9927	CLASH	23622248	Unspecified
	hsa-mir-34a-5p	MIMAT0000255	GNPDA1	10007	Proteomics	21566225	Unspecified
	hsa-mir-34a-5p	MIMAT0000255	BCL2L11	10018	PCR array	28097098	Unspecified
	hsa-mir-34a-5p	MIMAT0000255	TOM1	10043	Microarray//qRT-PCR	22815788	Unspecified
	hsa-mir-34a-5p	MIMAT0000255	DNAJB6	10049	Proteomics	21566225	Unspecified
	hsa-mir-34a-5p	MIMAT0000255	UBA2	10054	CLASH	23622248	Unspecified
	hsa-mir-34a-5p	MIMAT0000255	HUWE1	10075	Proteomics	21566225	Unspecified
	hsa-mir-34a-5p	MIMAT0000255	UST	10090	PAR-CLIP	23592263	Unspecified
	hsa-mir-34a-5p	MIMAT0000255	NAMPT	10135	Luciferase reporter assay//Western blot	23834033	Unspecified
	hsa-mir-34a-5p	MIMAT0000255	RBM12	10137	Proteomics	21566225	Unspecified
	hsa-mir-34a-5p	MIMAT0000255	WASF2	10163	Proteomics	21566225	Unspecified
	hsa-mir-34a-5p	MIMAT0000255	PLIN3	10226	Proteomics	21566225	Unspecified
	hsa-mir-34a-5p	MIMAT0000255	STAM2	10254	Proteomics	21566225	Unspecified
	hsa-mir-34a-5p	MIMAT0000255	TRAIP	10293	Proteomics	21566225	Unspecified
	hsa-mir-34a-5p	MIMAT0000255	AKR1A1	10327	Proteomics	21566225	Unspecified
	hsa-mir-34a-5p	MIMAT0000255	NOD1	10392	PCR array	28097098	Unspecified
	hsa-mir-34a-5p	MIMAT0000255	NDRG1	10397	Proteomics	21566225	Unspecified
	hsa-mir-34a-5p	MIMAT0000255	FAM3C	10447	Proteomics	21566225	Unspecified
	hsa-mir-34a-5p	MIMAT0000255	VAV3	10451	HITS-CLIP//PAR-CLIP	24906430|23706177|26701625|27418678	Unspecified
	hsa-mir-34a-5p	MIMAT0000255	TOMM40	10452	Proteomics	21566225	Unspecified
	hsa-mir-34a-5p	MIMAT0000255	CHERP	10523	Proteomics	21566225	Unspecified
	hsa-mir-34a-5p	MIMAT0000255	ATG7	10533	Flow//Immunofluorescence//In situ hybridization//qRT-PCR//Western blot	26313360	Unspecified
	hsa-mir-34a-5p	MIMAT0000255	TBL3	10607	Proteomics	21566225	Unspecified
	hsa-mir-34a-5p	MIMAT0000255	ERLIN1	10613	CLASH//Proteomics	21566225|23622248	Unspecified
	hsa-mir-34a-5p	MIMAT0000255	RBCK1	10616	Proteomics	21566225	Unspecified
	hsa-mir-34a-5p	MIMAT0000255	TXNIP	10628	PAR-CLIP//Sequencing	20371350|23446348	Unspecified
	hsa-mir-34a-5p	MIMAT0000255	IGF2BP3	10643	Immunohistochemistry//Luciferase reporter assay//Proteomics//qRT-PCR//Western blot	21566225|28399871	Unspecified
	hsa-mir-34a-5p	MIMAT0000255	KHDRBS1	10657	CLASH	23622248	Unspecified
	hsa-mir-34a-5p	MIMAT0000255	RRAGA	10670	CLASH	23622248	Unspecified
	hsa-mir-34a-5p	MIMAT0000255	STAG2	10735	Proteomics	21566225	Unspecified
	hsa-mir-34a-5p	MIMAT0000255	UTP14A	10813	Proteomics	21566225	Unspecified
	hsa-mir-34a-5p	MIMAT0000255	PNPLA6	10908	Proteomics	21566225	Unspecified
	hsa-mir-34a-5p	MIMAT0000255	SUGT1	10910	Proteomics	21566225	Unspecified
	hsa-mir-34a-5p	MIMAT0000255	EHD1	10938	Proteomics	21566225	Unspecified
	hsa-mir-34a-5p	MIMAT0000255	POP1	10940	Proteomics	21566225	Unspecified
	hsa-mir-34a-5p	MIMAT0000255	IMMT	10989	Proteomics	21566225	Unspecified
	hsa-mir-34a-5p	MIMAT0000255	KIF2C	11004	Proteomics	21566225	Unspecified
	hsa-mir-34a-5p	MIMAT0000255	TPPP	11076	Sequencing	20371350	Unspecified
	hsa-mir-34a-5p	MIMAT0000255	NUPL2	11097	Proteomics	21566225	Unspecified
	hsa-mir-34a-5p	MIMAT0000255	HNRNPUL1	11100	Proteomics	21566225	Unspecified
	hsa-mir-34a-5p	MIMAT0000255	HIBADH	11112	Proteomics	21566225	Unspecified
	hsa-mir-34a-5p	MIMAT0000255	FICD	11153	PAR-CLIP	23446348|20371350	Unspecified
	hsa-mir-34a-5p	MIMAT0000255	ERLIN2	11160	Proteomics	21566225	Unspecified
	hsa-mir-34a-5p	MIMAT0000255	NUDT5	11164	CLASH	23622248	Unspecified
	hsa-mir-34a-5p	MIMAT0000255	NUDT3	11165	PAR-CLIP	27292025	Unspecified
	hsa-mir-34a-5p	MIMAT0000255	STRAP	11171	Proteomics	21566225	Unspecified
	hsa-mir-34a-5p	MIMAT0000255	BAZ2A	11176	PAR-CLIP	23592263	Unspecified
	hsa-mir-34a-5p	MIMAT0000255	PLPBP	11212	Proteomics	21566225	Unspecified
	hsa-mir-34a-5p	MIMAT0000255	DDX19B	11269	PAR-CLIP	23592263|26701625|27292025	Unspecified
	hsa-mir-34a-5p	MIMAT0000255	ATXN2L	11273	Proteomics	21566225	Unspecified
	hsa-mir-34a-5p	MIMAT0000255	KLF12	11278	ChIP-seq//Luciferase reporter assay//Next Generation Sequencing (NGS)//pSILAC//qRT-PCR//Western blot	26183718	Unspecified
	hsa-mir-34a-5p	MIMAT0000255	VPS45	11311	Proteomics	21566225	Unspecified
	hsa-mir-34a-5p	MIMAT0000255	ECD	11319	Proteomics	21566225	Unspecified
	hsa-mir-34a-5p	MIMAT0000255	CBX3	11335	PAR-CLIP	21572407	Unspecified
	hsa-mir-34a-5p	MIMAT0000255	ITGA11	22801	HITS-CLIP	24906430|23313552|27418678	Unspecified
	hsa-mir-34a-5p	MIMAT0000255	COPZ1	22818	PAR-CLIP	23592263	Unspecified
	hsa-mir-34a-5p	MIMAT0000255	CPEB3	22849	HITS-CLIP	23824327|27418678	Unspecified
	hsa-mir-34a-5p	MIMAT0000255	RALY	22913	PAR-CLIP	26701625	Unspecified
	hsa-mir-34a-5p	MIMAT0000255	NCBP2	22916	Sequencing	20371350	Unspecified
	hsa-mir-34a-5p	MIMAT0000255	RPIA	22934	Proteomics	21566225	Unspecified
	hsa-mir-34a-5p	MIMAT0000255	NT5C2	22978	Proteomics	21566225	Unspecified
	hsa-mir-34a-5p	MIMAT0000255	KLHDC10	23008	PAR-CLIP	26701625	Unspecified
	hsa-mir-34a-5p	MIMAT0000255	MAST3	23031	PAR-CLIP	22291592	Unspecified
	hsa-mir-34a-5p	MIMAT0000255	RRP1B	23076	Proteomics	21566225	Unspecified
	hsa-mir-34a-5p	MIMAT0000255	PEG10	23089	PAR-CLIP	23446348	Unspecified
	hsa-mir-34a-5p	MIMAT0000255	POGZ	23126	Sequencing	20371350	Unspecified
	hsa-mir-34a-5p	MIMAT0000255	TTLL12	23170	Proteomics	21566225	Unspecified
	hsa-mir-34a-5p	MIMAT0000255	METAP1	23173	Sequencing	20371350	Unspecified
	hsa-mir-34a-5p	MIMAT0000255	ATG4B	23192	Flow//Immunofluorescence//In situ hybridization//Luciferase reporter assay//qRT-PCR//Western blot	26313360|26499184	Unspecified
	hsa-mir-34a-5p	MIMAT0000255	GANAB	23193	CLASH	23622248	Unspecified
	hsa-mir-34a-5p	MIMAT0000255	ZC3H4	23211	Sequencing	20371350	Unspecified
	hsa-mir-34a-5p	MIMAT0000255	SYNE2	23224	Proteomics	21566225	Unspecified
	hsa-mir-34a-5p	MIMAT0000255	CAMTA1	23261	Sequencing	20371350	Unspecified
	hsa-mir-34a-5p	MIMAT0000255	FAM208A	23272	CLASH	23622248	Unspecified
	hsa-mir-34a-5p	MIMAT0000255	ANKS1A	23294	PAR-CLIP	26701625	Unspecified
	hsa-mir-34a-5p	MIMAT0000255	ACSL6	23305	Proteomics	21566225	Unspecified
	hsa-mir-34a-5p	MIMAT0000255	SATB2	23314	HITS-CLIP//PAR-CLIP//Sequencing	20371350|23446348|21572407|23824327	Unspecified
	hsa-mir-34a-5p	MIMAT0000255	U2SURP	23350	Proteomics	21566225	Unspecified
	hsa-mir-34a-5p	MIMAT0000255	UBR4	23352	Proteomics	21566225	Unspecified
	hsa-mir-34a-5p	MIMAT0000255	LARP1	23367	Proteomics	21566225	Unspecified
	hsa-mir-34a-5p	MIMAT0000255	PUM2	23369	Sequencing	20371350	Unspecified
	hsa-mir-34a-5p	MIMAT0000255	ADNP	23394	Proteomics	21566225	Unspecified
	hsa-mir-34a-5p	MIMAT0000255	SIRT1	23411	Flow//Immunoblot//Immunohistochemistry//Luciferase reporter assay//Northern blot//qRT-PCR//Reporter assay//Western blot	18834855|18755897|19461653|20185821|19221490|20627091|20470934|21297663|21909380|24504520|23954321|23292172|25348795|25526086|25585539|26802970|28250026|28236278|25826085|27767101|27247228	Unspecified
	hsa-mir-34a-5p	MIMAT0000255	SF3B3	23450	PAR-CLIP	23592263	Unspecified
	hsa-mir-34a-5p	MIMAT0000255	SRRM2	23524	Proteomics	21566225	Unspecified
	hsa-mir-34a-5p	MIMAT0000255	NNT	23530	Proteomics	21566225	Unspecified
	hsa-mir-34a-5p	MIMAT0000255	TNPO3	23534	Proteomics	21566225	Unspecified
	hsa-mir-34a-5p	MIMAT0000255	DDAH2	23564	Proteomics	21566225	Unspecified
	hsa-mir-34a-5p	MIMAT0000255	DDAH1	23576	Proteomics	21566225	Unspecified
	hsa-mir-34a-5p	MIMAT0000255	CASP14	23581	PCR array	28097098	Unspecified
	hsa-mir-34a-5p	MIMAT0000255	SSBP2	23635	PAR-CLIP	23592263	Unspecified
	hsa-mir-34a-5p	MIMAT0000255	NUP62	23636	Sequencing	20371350	Unspecified
	hsa-mir-34a-5p	MIMAT0000255	FKBP8	23770	PAR-CLIP	26701625	Unspecified
	hsa-mir-34a-5p	MIMAT0000255	APOL2	23780	Proteomics	21566225	Unspecified
	hsa-mir-34a-5p	MIMAT0000255	BCL2L13	23786	PAR-CLIP//Sequencing	20371350|23446348	Unspecified
	hsa-mir-34a-5p	MIMAT0000255	KIF4A	24137	Proteomics	21566225	Unspecified
	hsa-mir-34a-5p	MIMAT0000255	RAB3GAP2	25782	Proteomics	21566225	Unspecified
	hsa-mir-34a-5p	MIMAT0000255	GEMIN5	25929	Proteomics	21566225	Unspecified
	hsa-mir-34a-5p	MIMAT0000255	RNF167	26001	CLASH	23622248	Unspecified
	hsa-mir-34a-5p	MIMAT0000255	GORASP2	26003	Proteomics	21566225	Unspecified
	hsa-mir-34a-5p	MIMAT0000255	GIGYF2	26058	Proteomics	21566225	Unspecified
	hsa-mir-34a-5p	MIMAT0000255	RTL8A	26071	PAR-CLIP	23446348|27292025	Unspecified
	hsa-mir-34a-5p	MIMAT0000255	GAPVD1	26130	Proteomics	21566225	Unspecified
	hsa-mir-34a-5p	MIMAT0000255	TES	26136	Proteomics	21566225	Unspecified
	hsa-mir-34a-5p	MIMAT0000255	PHF19	26147	PAR-CLIP//Sequencing	20371350|23446348	Unspecified
	hsa-mir-34a-5p	MIMAT0000255	PLA2G2D	26279	PAR-CLIP	23592263	Unspecified
	hsa-mir-34a-5p	MIMAT0000255	MYOF	26509	Proteomics	21566225	Unspecified
	hsa-mir-34a-5p	MIMAT0000255	AGO1	26523	CLASH	23622248	Unspecified
	hsa-mir-34a-5p	MIMAT0000255	FOXP1	27086	Flow//Immunoblot//Luciferase reporter assay//Reporter assay//Western blot	20598588|21460242	Unspecified
	hsa-mir-34a-5p	MIMAT0000255	ATP5S	27109	Luciferase reporter assay//qRT-PCR//Western blot	26385595	Unspecified
	hsa-mir-34a-5p	MIMAT0000255	CIDEB	27141	PCR array	28097098	Unspecified
	hsa-mir-34a-5p	MIMAT0000255	TNFRSF21	27242	PCR array	28097098	Unspecified
	hsa-mir-34a-5p	MIMAT0000255	TNRC18P2	27320	PAR-CLIP	23592263|24398324|23446348|21572407|20371350	Unspecified
	hsa-mir-34a-5p	MIMAT0000255	UBE2S	27338	Proteomics	21566225	Unspecified
	hsa-mir-34a-5p	MIMAT0000255	POLL	27343	PAR-CLIP	26701625	Unspecified
	hsa-mir-34a-5p	MIMAT0000255	DLL1	28514	Luciferase reporter assay//qRT-PCR//Western blot	14697198|19461653|20144220|23327670	Unspecified
	hsa-mir-34a-5p	MIMAT0000255	SLC6A16	28968	Proteomics	21566225	Unspecified
	hsa-mir-34a-5p	MIMAT0000255	UHRF1	29128	CLASH//Proteomics	21566225|23622248	Unspecified
	hsa-mir-34a-5p	MIMAT0000255	TMOD3	29766	Proteomics	21566225	Unspecified
	hsa-mir-34a-5p	MIMAT0000255	TMOD2	29767	Proteomics	21566225	Unspecified
	hsa-mir-34a-5p	MIMAT0000255	SENP1	29843	Sequencing	20371350	Unspecified
	hsa-mir-34a-5p	MIMAT0000255	RBM15B	29890	CLASH	23622248	Unspecified
	hsa-mir-34a-5p	MIMAT0000255	SEC61A1	29927	PAR-CLIP	26701625	Unspecified
	hsa-mir-34a-5p	MIMAT0000255	SNX12	29934	Sequencing	20371350	Unspecified
	hsa-mir-34a-5p	MIMAT0000255	UBQLN2	29978	Proteomics	21566225	Unspecified
	hsa-mir-34a-5p	MIMAT0000255	CDON	50937	Sequencing	20371350	Unspecified
	hsa-mir-34a-5p	MIMAT0000255	RDH11	51109	PAR-CLIP//Proteomics//Sequencing	21566225|20371350|27292025	Unspecified
	hsa-mir-34a-5p	MIMAT0000255	MRNIP	51149	HITS-CLIP	28735896	Unspecified
	hsa-mir-34a-5p	MIMAT0000255	LEF1	51176	Luciferase reporter assay//Microarray//Proteomics//qRT-PCR//Reporter assay//Western blot	21566225|25587085|28098757	Unspecified
	hsa-mir-34a-5p	MIMAT0000255	IER5	51278	HITS-CLIP	23824327	Unspecified
	hsa-mir-34a-5p	MIMAT0000255	BFAR	51283	PCR array	28097098	Unspecified
	hsa-mir-34a-5p	MIMAT0000255	FZR1	51343	PAR-CLIP	26701625	Unspecified
	hsa-mir-34a-5p	MIMAT0000255	TRPV2	51393	PAR-CLIP	26701625	Unspecified
	hsa-mir-34a-5p	MIMAT0000255	ANAPC5	51433	CLASH	23622248	Unspecified
	hsa-mir-34a-5p	MIMAT0000255	NELFCD	51497	Proteomics	21566225	Unspecified
	hsa-mir-34a-5p	MIMAT0000255	SIRT7	51547	ChIP-seq//Immunohistochemistry//Luciferase reporter assay//qRT-PCR//Western blot	25860861	Unspecified
	hsa-mir-34a-5p	MIMAT0000255	SIRT6	51548	qRT-PCR//Western blot	27767101	Unspecified
	hsa-mir-34a-5p	MIMAT0000255	GDE1	51573	Sequencing	20371350	Unspecified
	hsa-mir-34a-5p	MIMAT0000255	MED15	51586	CLASH	23622248	Unspecified
	hsa-mir-34a-5p	MIMAT0000255	PIGT	51604	CLASH	23622248	Unspecified
	hsa-mir-34a-5p	MIMAT0000255	ZFR	51663	Proteomics	21566225	Unspecified
	hsa-mir-34a-5p	MIMAT0000255	CMPK1	51727	Proteomics	21566225	Unspecified
	hsa-mir-34a-5p	MIMAT0000255	WBP11	51729	Proteomics	21566225	Unspecified
	hsa-mir-34a-5p	MIMAT0000255	GALNT7	51809	Luciferase reporter assay//qRT-PCR//Western blot	24482044	Unspecified
	hsa-mir-34a-5p	MIMAT0000255	CLIC5	53405	HITS-CLIP	23824327	Unspecified
	hsa-mir-34a-5p	MIMAT0000255	CYCS	54205	PCR array	28097098	Unspecified
	hsa-mir-34a-5p	MIMAT0000255	TREM2	54209	Luciferase reporter assay//Microarray//qRT-PCR//Western blot	26949937	Unspecified
	hsa-mir-34a-5p	MIMAT0000255	XRN1	54464	Sequencing	20371350	Unspecified
	hsa-mir-34a-5p	MIMAT0000255	PUS7	54517	Proteomics	21566225	Unspecified
	hsa-mir-34a-5p	MIMAT0000255	DDX56	54606	Proteomics	21566225	Unspecified
	hsa-mir-34a-5p	MIMAT0000255	2021-03-05	54708	Microarray//qRT-PCR	22815788	Unspecified
	hsa-mir-34a-5p	MIMAT0000255	ERCC6L	54821	Proteomics	21566225	Unspecified
	hsa-mir-34a-5p	MIMAT0000255	UHRF1BP1	54887	Proteomics	21566225	Unspecified
	hsa-mir-34a-5p	MIMAT0000255	KANSL2	54934	CLASH	23622248	Unspecified
	hsa-mir-34a-5p	MIMAT0000255	USP47	55031	Proteomics	21566225	Unspecified
	hsa-mir-34a-5p	MIMAT0000255	PTCD3	55037	CLASH	23622248	Unspecified
	hsa-mir-34a-5p	MIMAT0000255	FIGN	55137	Sequencing	20371350	Unspecified
	hsa-mir-34a-5p	MIMAT0000255	INTS10	55174	CLASH	23622248	Unspecified
	hsa-mir-34a-5p	MIMAT0000255	OGFOD1	55239	Proteomics	21566225	Unspecified
	hsa-mir-34a-5p	MIMAT0000255	IMP3	55272	Proteomics	21566225	Unspecified
	hsa-mir-34a-5p	MIMAT0000255	PPP6R3	55291	Proteomics	21566225	Unspecified
	hsa-mir-34a-5p	MIMAT0000255	MCM10	55388	CLASH	23622248	Unspecified
	hsa-mir-34a-5p	MIMAT0000255	YOD1	55432	PAR-CLIP	21572407	Unspecified
	hsa-mir-34a-5p	MIMAT0000255	CDKN2AIP	55602	Proteomics	21566225	Unspecified
	hsa-mir-34a-5p	MIMAT0000255	FAM46A	55603	CLASH	23622248	Unspecified
	hsa-mir-34a-5p	MIMAT0000255	LRRC40	55631	Proteomics	21566225	Unspecified
	hsa-mir-34a-5p	MIMAT0000255	PRPF40A	55660	Proteomics	21566225	Unspecified
	hsa-mir-34a-5p	MIMAT0000255	FRMD4A	55691	q-PCR	25864118	Unspecified
	hsa-mir-34a-5p	MIMAT0000255	NSUN5	55695	Proteomics	21566225	Unspecified
	hsa-mir-34a-5p	MIMAT0000255	POLR3E	55718	CLASH	23622248	Unspecified
	hsa-mir-34a-5p	MIMAT0000255	UBAP2	55833	Proteomics	21566225	Unspecified
	hsa-mir-34a-5p	MIMAT0000255	CMAS	55907	Proteomics	21566225	Unspecified
	hsa-mir-34a-5p	MIMAT0000255	DIABLO	56616	CLASH//PCR array	23622248|28097098	Unspecified
	hsa-mir-34a-5p	MIMAT0000255	SAR1A	56681	PAR-CLIP	23446348	Unspecified
	hsa-mir-34a-5p	MIMAT0000255	TM9SF3	56889	PAR-CLIP	23446348|21572407|20371350	Unspecified
	hsa-mir-34a-5p	MIMAT0000255	CCNL1	57018	Proteomics	21566225	Unspecified
	hsa-mir-34a-5p	MIMAT0000255	DDX24	57062	Proteomics	21566225	Unspecified
	hsa-mir-34a-5p	MIMAT0000255	TIGAR	57103	Proteomics	21566225	Unspecified
	hsa-mir-34a-5p	MIMAT0000255	RTN4	57142	Proteomics//Sequencing	21566225|20371350	Unspecified
	hsa-mir-34a-5p	MIMAT0000255	CORO1B	57175	Proteomics	21566225	Unspecified
	hsa-mir-34a-5p	MIMAT0000255	THOC2	57187	Proteomics	21566225	Unspecified
	hsa-mir-34a-5p	MIMAT0000255	BIRC6	57448	CLASH//PCR array	23622248|28097098	Unspecified
	hsa-mir-34a-5p	MIMAT0000255	PRR12	57479	CLASH	23622248	Unspecified
	hsa-mir-34a-5p	MIMAT0000255	ESYT2	57488	Proteomics	21566225	Unspecified
	hsa-mir-34a-5p	MIMAT0000255	NUFIP2	57532	Proteomics	21566225	Unspecified
	hsa-mir-34a-5p	MIMAT0000255	ALS2	57679	CLASH	23622248	Unspecified
	hsa-mir-34a-5p	MIMAT0000255	RRAGD	58528	PAR-CLIP	23446348|20371350	Unspecified
	hsa-mir-34a-5p	MIMAT0000255	TGIF2	60436	qRT-PCR//Western blot	26464633	Unspecified
	hsa-mir-34a-5p	MIMAT0000255	AASDHPPT	60496	HITS-CLIP	23824327	Unspecified
	hsa-mir-34a-5p	MIMAT0000255	RBM26	64062	Proteomics	21566225	Unspecified
	hsa-mir-34a-5p	MIMAT0000255	MOAP1	64112	PAR-CLIP	21572407	Unspecified
	hsa-mir-34a-5p	MIMAT0000255	NCAPG	64151	Proteomics	21566225	Unspecified
	hsa-mir-34a-5p	MIMAT0000255	MMS19	64210	Proteomics	21566225	Unspecified
	hsa-mir-34a-5p	MIMAT0000255	GIGYF1	64599	PAR-CLIP	24398324|23446348	Unspecified
	hsa-mir-34a-5p	MIMAT0000255	NUCKS1	64710	Proteomics	21566225	Unspecified
	hsa-mir-34a-5p	MIMAT0000255	EPS8L2	64787	Proteomics	21566225	Unspecified
	hsa-mir-34a-5p	MIMAT0000255	MRPS26	64949	Proteomics	21566225	Unspecified
	hsa-mir-34a-5p	MIMAT0000255	MTMR9	66036	Sequencing	20371350	Unspecified
	hsa-mir-34a-5p	MIMAT0000255	YIPF2	78992	Sequencing	20371350	Unspecified
	hsa-mir-34a-5p	MIMAT0000255	DDA1	79016	HITS-CLIP	23824327	Unspecified
	hsa-mir-34a-5p	MIMAT0000255	AHNAK	79026	Proteomics	21566225	Unspecified
	hsa-mir-34a-5p	MIMAT0000255	TMEM109	79073	Proteomics	21566225	Unspecified
	hsa-mir-34a-5p	MIMAT0000255	DCTPP1	79077	Proteomics	21566225	Unspecified
	hsa-mir-34a-5p	MIMAT0000255	WDR77	79084	CLASH	23622248	Unspecified
	hsa-mir-34a-5p	MIMAT0000255	EFHD2	79180	Proteomics	21566225	Unspecified
	hsa-mir-34a-5p	MIMAT0000255	VPS37B	79720	PAR-CLIP//Sequencing	20371350|23446348	Unspecified
	hsa-mir-34a-5p	MIMAT0000255	CARF	79800	Proteomics	21566225	Unspecified
	hsa-mir-34a-5p	MIMAT0000255	MCMBP	79892	Proteomics	21566225	Unspecified
	hsa-mir-34a-5p	MIMAT0000255	NANOG	79923	Luciferase reporter assay//Western blot	22020437	Unspecified
	hsa-mir-34a-5p	MIMAT0000255	ZNF614	80110	PAR-CLIP	27292025	Unspecified
	hsa-mir-34a-5p	MIMAT0000255	PROSER1	80209	Sequencing	20371350	Unspecified
	hsa-mir-34a-5p	MIMAT0000255	EDEM3	80267	PAR-CLIP	23592263	Unspecified
	hsa-mir-34a-5p	MIMAT0000255	ULBP2	80328	Flow//Luciferase reporter assay//PAR-CLIP//Western blot	22102694|26701625	Unspecified
	hsa-mir-34a-5p	MIMAT0000255	DNAJC5	80331	CLASH	23622248	Unspecified
	hsa-mir-34a-5p	MIMAT0000255	SLC35G2	80723	PAR-CLIP	21572407	Unspecified
	hsa-mir-34a-5p	MIMAT0000255	PRR3	80742	CLASH	23622248	Unspecified
	hsa-mir-34a-5p	MIMAT0000255	CYB5B	80777	Proteomics	21566225	Unspecified
	hsa-mir-34a-5p	MIMAT0000255	LNPK	80856	PAR-CLIP	23592263	Unspecified
	hsa-mir-34a-5p	MIMAT0000255	SGPP1	81537	Sequencing	20371350	Unspecified
	hsa-mir-34a-5p	MIMAT0000255	TSPAN14	81619	Sequencing	20371350	Unspecified
	hsa-mir-34a-5p	MIMAT0000255	SH3BGRL3	83442	Proteomics	21566225	Unspecified
	hsa-mir-34a-5p	MIMAT0000255	SESN2	83667	PAR-CLIP	23446348	Unspecified
	hsa-mir-34a-5p	MIMAT0000255	ZNF644	84146	PAR-CLIP//Sequencing	20371350|23446348	Unspecified
	hsa-mir-34a-5p	MIMAT0000255	NLRC5	84166	Luciferase reporter assay//qRT-PCR//Western blot	27423514	Unspecified
	hsa-mir-34a-5p	MIMAT0000255	SETD3	84193	Proteomics	21566225	Unspecified
	hsa-mir-34a-5p	MIMAT0000255	ZDHHC16	84287	PAR-CLIP	21572407	Unspecified
	hsa-mir-34a-5p	MIMAT0000255	LLPH	84298	Sequencing	20371350	Unspecified
	hsa-mir-34a-5p	MIMAT0000255	TMEM246	84302	PAR-CLIP	26701625	Unspecified
	hsa-mir-34a-5p	MIMAT0000255	APOPT1	84334	PAR-CLIP	20371350	Unspecified
	hsa-mir-34a-5p	MIMAT0000255	RAB11FIP4	84440	PAR-CLIP	26701625	Unspecified
	hsa-mir-34a-5p	MIMAT0000255	DCTN5	84516	PAR-CLIP	23446348	Unspecified
	hsa-mir-34a-5p	MIMAT0000255	ACSS1	84532	Proteomics	21566225	Unspecified
	hsa-mir-34a-5p	MIMAT0000255	TNRC18	84629	Sequencing	20371350	Unspecified
	hsa-mir-34a-5p	MIMAT0000255	AFAP1L2	84632	Proteomics	21566225	Unspecified
	hsa-mir-34a-5p	MIMAT0000255	PRRC2B	84726	CLASH	23622248	Unspecified
	hsa-mir-34a-5p	MIMAT0000255	FUT10	84750	Sequencing	20371350	Unspecified
	hsa-mir-34a-5p	MIMAT0000255	ADO	84890	Sequencing	20371350	Unspecified
	hsa-mir-34a-5p	MIMAT0000255	FAM104A	84923	PAR-CLIP//Sequencing	20371350	Unspecified
	hsa-mir-34a-5p	MIMAT0000255	ATG4C	84938	Flow//Immunofluorescence//In situ hybridization//qRT-PCR//Western blot	26313360	Unspecified
	hsa-mir-34a-5p	MIMAT0000255	ATG4D	84971	Flow//Immunofluorescence//In situ hybridization//qRT-PCR//Western blot	26313360	Unspecified
	hsa-mir-34a-5p	MIMAT0000255	HIST1H2AH	85235	Proteomics	21566225	Unspecified
	hsa-mir-34a-5p	MIMAT0000255	SHANK3	85358	PAR-CLIP	26701625	Unspecified
	hsa-mir-34a-5p	MIMAT0000255	KBTBD6	89890	PAR-CLIP//Sequencing	20371350|21572407	Unspecified
	hsa-mir-34a-5p	MIMAT0000255	PAPLN	89932	PAR-CLIP	20371350	Unspecified
	hsa-mir-34a-5p	MIMAT0000255	ZNF551	90233	PAR-CLIP	23446348|20371350	Unspecified
	hsa-mir-34a-5p	MIMAT0000255	MCFD2	90411	PAR-CLIP	27292025	Unspecified
	hsa-mir-34a-5p	MIMAT0000255	ZNF598	90850	CLASH	23622248	Unspecified
	hsa-mir-34a-5p	MIMAT0000255	BTF3L4	91408	Proteomics	21566225	Unspecified
	hsa-mir-34a-5p	MIMAT0000255	MTDH	92140	Sequencing	20371350	Unspecified
	hsa-mir-34a-5p	MIMAT0000255	HIST3H2A	92815	Proteomics	21566225	Unspecified
	hsa-mir-34a-5p	MIMAT0000255	RWDD2A	112611	PAR-CLIP	22012620|20371350|26701625|27292025	Unspecified
	hsa-mir-34a-5p	MIMAT0000255	MBD6	114785	PAR-CLIP	23592263	Unspecified
	hsa-mir-34a-5p	MIMAT0000255	VASN	114990	PAR-CLIP	20371350	Unspecified
	hsa-mir-34a-5p	MIMAT0000255	ATG4A	115201	Flow//Immunofluorescence//In situ hybridization//qRT-PCR//Western blot	26313360	Unspecified
	hsa-mir-34a-5p	MIMAT0000255	EVI5L	115704	PAR-CLIP	21572407	Unspecified
	hsa-mir-34a-5p	MIMAT0000255	HIST4H4	121504	Proteomics	21566225	Unspecified
	hsa-mir-34a-5p	MIMAT0000255	SOCS4	122809	Sequencing	20371350	Unspecified
	hsa-mir-34a-5p	MIMAT0000255	LRRC28	123355	CLASH	23622248	Unspecified
	hsa-mir-34a-5p	MIMAT0000255	ZSWIM7	125150	Proteomics	21566225	Unspecified
	hsa-mir-34a-5p	MIMAT0000255	IRGQ	126298	Proteomics	21566225	Unspecified
	hsa-mir-34a-5p	MIMAT0000255	HIST2H3C	126961	Proteomics	21566225	Unspecified
	hsa-mir-34a-5p	MIMAT0000255	HIST3H2BB	128312	Proteomics	21566225	Unspecified
	hsa-mir-34a-5p	MIMAT0000255	UBXN2B	137886	PAR-CLIP	23446348	Unspecified
	hsa-mir-34a-5p	MIMAT0000255	SLC2A14	144195	Proteomics	21566225	Unspecified
	hsa-mir-34a-5p	MIMAT0000255	CDAN1	146059	CLASH	23622248	Unspecified
	hsa-mir-34a-5p	MIMAT0000255	KLB	152831	Luciferase reporter assay	22988100	Unspecified
	hsa-mir-34a-5p	MIMAT0000255	TMEM167A	153339	PAR-CLIP	23446348	Unspecified
	hsa-mir-34a-5p	MIMAT0000255	VPS37D	155382	PAR-CLIP	20371350	Unspecified
	hsa-mir-34a-5p	MIMAT0000255	RBM33	155435	CLASH	23622248	Unspecified
	hsa-mir-34a-5p	MIMAT0000255	IFNLR1	163702	PAR-CLIP	23592263	Unspecified
	hsa-mir-34a-5p	MIMAT0000255	GPR156	165829	PAR-CLIP	23592263	Unspecified
	hsa-mir-34a-5p	MIMAT0000255	TPCN2	219931	PAR-CLIP	20371350	Unspecified
	hsa-mir-34a-5p	MIMAT0000255	REEP3	221035	Sequencing	20371350	Unspecified
	hsa-mir-34a-5p	MIMAT0000255	HIST1H2AA	221613	Proteomics	21566225	Unspecified
	hsa-mir-34a-5p	MIMAT0000255	ADGRG3	222487	PAR-CLIP	27292025	Unspecified
	hsa-mir-34a-5p	MIMAT0000255	AKR7L	246181	Proteomics	21566225	Unspecified
	hsa-mir-34a-5p	MIMAT0000255	RICTOR	253260	Flow cytometry//Luciferase reporter assay//QRTPCR//Western blot	24944883	Unspecified
	hsa-mir-34a-5p	MIMAT0000255	RNF169	254225	Microarray//qRT-PCR	22815788	Unspecified
	hsa-mir-34a-5p	MIMAT0000255	HIST1H2BA	255626	Proteomics	21566225	Unspecified
	hsa-mir-34a-5p	MIMAT0000255	MFSD8	256471	PAR-CLIP	22100165	Unspecified
	hsa-mir-34a-5p	MIMAT0000255	POTED	317754	HITS-CLIP	23313552	Unspecified
	hsa-mir-34a-5p	MIMAT0000255	HIST2H2AB	317772	Proteomics	21566225	Unspecified
	hsa-mir-34a-5p	MIMAT0000255	HIST2H3A	333932	Proteomics	21566225	Unspecified
	hsa-mir-34a-5p	MIMAT0000255	ATXN1L	342371	PAR-CLIP	23592263	Unspecified
	hsa-mir-34a-5p	MIMAT0000255	DGAT2L6	347516	PAR-CLIP	27292025	Unspecified
	hsa-mir-34a-5p	MIMAT0000255	DNAAF3	352909	PAR-CLIP	22100165	Unspecified
	hsa-mir-34a-5p	MIMAT0000255	MIGA1	374986	PAR-CLIP	21572407	Unspecified
	hsa-mir-34a-5p	MIMAT0000255	Crtc1	382056	ELISA//Immunoprecipitaion//Luciferase reporter assay//Microarray//Next Generation Sequencing (NGS)//qRT-PCR//Western blot	27869139	Unspecified
	hsa-mir-34a-5p	MIMAT0000255	STAG3L3	442578	Proteomics	21566225	Unspecified
	hsa-mir-34a-5p	MIMAT0000255	C18orf32	497661	PAR-CLIP	22012620	Unspecified
	hsa-mir-34a-5p	MIMAT0000255	HIST2H4B	554313	CLASH//Proteomics	21566225|23622248	Unspecified
	hsa-mir-34a-5p	MIMAT0000255	H3F3AP6	644914	Proteomics	21566225	Unspecified
	hsa-mir-34a-5p	MIMAT0000255	HIST2H3D	653604	Proteomics	21566225	Unspecified
	hsa-mir-34a-5p	MIMAT0000255	HIST2H2AA4	723790	Proteomics	21566225	Unspecified
	hsa-mir-34a-5p	MIMAT0000255	GXYLT2	727936	PAR-CLIP	21572407	Unspecified
	hsa-mir-34a-5p	MIMAT0000255	D2HGDH	728294	CLASH	23622248	Unspecified
	hsa-mir-34a-5p	MIMAT0000255	HOTAIR	100124700	ChIP-seq//Immunohistochemistry//Immunoprecipitaion//Luciferase reporter assay//qRT-PCR//Western blot	23936419|26136075	Unspecified
	hsa-mir-34a-5p	MIMAT0000255	CD24	100133941	Immunoblot//Immunoprecipitaion//Luciferase reporter assay//qRT-PCR	23533633	Unspecified
	hsa-mir-181a-3p	MIMAT0000270	ARHGDIA	396	PAR-CLIP	26701625	Unspecified
	hsa-mir-181a-3p	MIMAT0000270	MARK2	2011	PAR-CLIP	26701625	Unspecified
	hsa-mir-181a-3p	MIMAT0000270	CFHR3	10878	HITS-CLIP	19536157	Unspecified
	hsa-mir-181a-3p	MIMAT0000270	PRR11	55771	HITS-CLIP	23824327	Unspecified
	hsa-mir-181a-3p	MIMAT0000270	WDR13	64743	HITS-CLIP	23824327|27418678	Unspecified
	hsa-mir-181a-3p	MIMAT0000270	ZNF426	79088	HITS-CLIP	27418678	Unspecified
	hsa-mir-181a-3p	MIMAT0000270	NANOG	79923	Luciferase reporter assay	23344176	Unspecified
	hsa-mir-181a-3p	MIMAT0000270	CTC1	80169	PAR-CLIP	23446348|20371350|26701625|27292025	Unspecified
	hsa-mir-181a-3p	MIMAT0000270	VMP1	81671	HITS-CLIP//PAR-CLIP	23592263|21572407|20371350|24906430|23706177|23313552|22927820|26701625|27292025|27418678|28735896	Unspecified
	hsa-mir-181a-3p	MIMAT0000270	HOOK3	84376	CLASH	23622248	Unspecified
	hsa-mir-224-5p	MIMAT0000281	ARL4D	379	HITS-CLIP	19536157	Unspecified
	hsa-mir-224-5p	MIMAT0000281	ARSB	411	CLASH	23622248	Unspecified
	hsa-mir-224-5p	MIMAT0000281	CCND1	595	PAR-CLIP	26701625	Unspecified
	hsa-mir-224-5p	MIMAT0000281	BCL2	596	Microarray//qRT-PCR//Western blot	22989374	Unspecified
	hsa-mir-224-5p	MIMAT0000281	CASP3	836	Luciferase reporter assay//Western blot	26307684	Unspecified
	hsa-mir-224-5p	MIMAT0000281	CASP7	840	Luciferase reporter assay//qRT-PCR//Western blot	26307684	Unspecified
	hsa-mir-224-5p	MIMAT0000281	CD40	958	Microarray//qRT-PCR	19475450	Unspecified
	hsa-mir-224-5p	MIMAT0000281	CDC42	998	Luciferase reporter assay//Microarray//qRT-PCR//Western blot	20023705|24817781|22989374	Unspecified
	hsa-mir-224-5p	MIMAT0000281	CDH1	999	Luciferase reporter assay//qRT-PCR//Western blot	22989374|25804630	Unspecified
	hsa-mir-224-5p	MIMAT0000281	AP2M1	1173	Luciferase reporter assay	20065103	Unspecified
	hsa-mir-224-5p	MIMAT0000281	COX6B1	1340	PAR-CLIP	21572407|20371350	Unspecified
	hsa-mir-224-5p	MIMAT0000281	CSTF2	1478	PAR-CLIP	20371350	Unspecified
	hsa-mir-224-5p	MIMAT0000281	DIO1	1733	Luciferase reporter assay//qRT-PCR//Western blot	21912701	Unspecified
	hsa-mir-224-5p	MIMAT0000281	DPYSL2	1808	qRT-PCR//Western blot	23667495	Unspecified
	hsa-mir-224-5p	MIMAT0000281	EDNRA	1909	Immunofluorescence//In situ hybridization//Luciferase reporter assay//Northern blot//qRT-PCR//Western blot	20827281	Unspecified
	hsa-mir-224-5p	MIMAT0000281	EFNA3	1944	PAR-CLIP	20371350	Unspecified
	hsa-mir-224-5p	MIMAT0000281	EYA4	2070	Immunofluorescence//In situ hybridization//Luciferase reporter assay//Northern blot//qRT-PCR//Western blot	20827281	Unspecified
	hsa-mir-224-5p	MIMAT0000281	F3	2152	PAR-CLIP	23592263|23446348|21572407|20371350|26701625	Unspecified
	hsa-mir-224-5p	MIMAT0000281	FOSB	2354	Luciferase reporter assay	20065103	Unspecified
	hsa-mir-224-5p	MIMAT0000281	MTOR	2475	ChIP-seq//Immunofluorescence//Immunohistochemistry//Luciferase reporter assay//qRT-PCR//Western blot	27315344	Unspecified
	hsa-mir-224-5p	MIMAT0000281	GALNT1	2589	PAR-CLIP	22100165	Unspecified
	hsa-mir-224-5p	MIMAT0000281	GNA11	2767	HITS-CLIP	27418678	Unspecified
	hsa-mir-224-5p	MIMAT0000281	GSK3B	2932	Luciferase reporter assay	25588771	Unspecified
	hsa-mir-224-5p	MIMAT0000281	HNRNPC	3183	PAR-CLIP	24398324|27292025	Unspecified
	hsa-mir-224-5p	MIMAT0000281	HNRNPF	3185	PAR-CLIP	20371350	Unspecified
	hsa-mir-224-5p	MIMAT0000281	HOXB3	3213	PAR-CLIP	23446348|21572407	Unspecified
	hsa-mir-224-5p	MIMAT0000281	HOXD10	3236	Luciferase reporter assay//qRT-PCR//Western blot	24219032	Unspecified
	hsa-mir-224-5p	MIMAT0000281	HSP90AA1	3320	PAR-CLIP	23446348|20371350|26701625	Unspecified
	hsa-mir-224-5p	MIMAT0000281	IGF1R	3480	PAR-CLIP	20371350	Unspecified
	hsa-mir-224-5p	MIMAT0000281	KRAS	3845	qRT-PCR//Western blot	23667495	Unspecified
	hsa-mir-224-5p	MIMAT0000281	SMAD4	4089	Luciferase reporter assay//qRT-PCR//Western blot	20118412|23922662|25804630	Unspecified
	hsa-mir-224-5p	MIMAT0000281	MITF	4286	HITS-CLIP	23313552	Unspecified
	hsa-mir-224-5p	MIMAT0000281	MOCS2	4338	HITS-CLIP	19536157	Unspecified
	hsa-mir-224-5p	MIMAT0000281	ABCC1	4363	HITS-CLIP	23313552	Unspecified
	hsa-mir-224-5p	MIMAT0000281	NIT1	4817	Luciferase reporter assay	20065103	Unspecified
	hsa-mir-224-5p	MIMAT0000281	PEBP1	5037	Flow//Luciferase reporter assay//qRT-PCR//Western blot	22809510|25017365	Unspecified
	hsa-mir-224-5p	MIMAT0000281	SERPINE1	5054	PAR-CLIP	22012620	Unspecified
	hsa-mir-224-5p	MIMAT0000281	PAK2	5062	Microarray//qRT-PCR//Western blot	22989374	Unspecified
	hsa-mir-224-5p	MIMAT0000281	PDGFRB	5159	Microarray//Northern blot	16331254	Unspecified
	hsa-mir-224-5p	MIMAT0000281	SERPINF2	5345	qRT-PCR//Western blot	24785373	Unspecified
	hsa-mir-224-5p	MIMAT0000281	MAP2K2	5605	HITS-CLIP	23824327	Unspecified
	hsa-mir-224-5p	MIMAT0000281	KLK10	5655	Luciferase reporter assay//qRT-PCR	20354523	Unspecified
	hsa-mir-224-5p	MIMAT0000281	PSMD3	5709	PAR-CLIP	23592263	Unspecified
	hsa-mir-224-5p	MIMAT0000281	PTX3	5806	Luciferase reporter assay//qRT-PCR//Western blot	24470395	Unspecified
	hsa-mir-224-5p	MIMAT0000281	RAC1	5879	Luciferase reporter assay	27222381	Unspecified
	hsa-mir-224-5p	MIMAT0000281	RBM3	5935	HITS-CLIP	23824327|19536157	Unspecified
	hsa-mir-224-5p	MIMAT0000281	RPL15	6138	PAR-CLIP	20371350	Unspecified
	hsa-mir-224-5p	MIMAT0000281	TIAL1	7073	HITS-CLIP	23824327	Unspecified
	hsa-mir-224-5p	MIMAT0000281	TPD52	7163	Luciferase reporter assay//qRT-PCR//Western blot	24768995	Unspecified
	hsa-mir-224-5p	MIMAT0000281	TPR	7175	PAR-CLIP	22012620	Unspecified
	hsa-mir-224-5p	MIMAT0000281	WRN	7486	PAR-CLIP	23592263	Unspecified
	hsa-mir-224-5p	MIMAT0000281	XPO1	7514	PAR-CLIP	21572407|20371350	Unspecified
	hsa-mir-224-5p	MIMAT0000281	YES1	7525	PAR-CLIP	22012620	Unspecified
	hsa-mir-224-5p	MIMAT0000281	ZNF135	7694	PAR-CLIP	22012620	Unspecified
	hsa-mir-224-5p	MIMAT0000281	ZKSCAN8	7745	PAR-CLIP	23592263	Unspecified
	hsa-mir-224-5p	MIMAT0000281	ZNF207	7756	PAR-CLIP	21572407	Unspecified
	hsa-mir-224-5p	MIMAT0000281	CXCR4	7852	Luciferase reporter assay//qRT-PCR//Western blot	20023705	Unspecified
	hsa-mir-224-5p	MIMAT0000281	NCOA3	8202	PAR-CLIP	24398324	Unspecified
	hsa-mir-224-5p	MIMAT0000281	ENC1	8507	PAR-CLIP	21572407	Unspecified
	hsa-mir-224-5p	MIMAT0000281	API5	8539	Luciferase reporter assay//qRT-PCR//Western blot	18319255	Unspecified
	hsa-mir-224-5p	MIMAT0000281	APLN	8862	Luciferase reporter assay//Microarray//qRT-PCR//Western blot	25532941	Unspecified
	hsa-mir-224-5p	MIMAT0000281	MBD2	8932	ChIP-seq//In situ hybridization//Luciferase reporter assay//Microarray//qRT-PCR//Western blot	23770133	Unspecified
	hsa-mir-224-5p	MIMAT0000281	CLDN12	9069	PAR-CLIP	24398324|23446348|20371350|27292025	Unspecified
	hsa-mir-224-5p	MIMAT0000281	TCEAL1	9338	Flow//Luciferase reporter assay//Microarray//qRT-PCR//Western blot	23399735|26343737	Unspecified
	hsa-mir-224-5p	MIMAT0000281	QKI	9444	PAR-CLIP	23446348|21572407	Unspecified
	hsa-mir-224-5p	MIMAT0000281	MPDU1	9526	PAR-CLIP	23592263	Unspecified
	hsa-mir-224-5p	MIMAT0000281	USP6NL	9712	PAR-CLIP	23592263	Unspecified
	hsa-mir-224-5p	MIMAT0000281	SEC14L5	9717	PAR-CLIP	20371350	Unspecified
	hsa-mir-224-5p	MIMAT0000281	TOMM20	9804	PAR-CLIP	22012620|21572407|20371350	Unspecified
	hsa-mir-224-5p	MIMAT0000281	MED13	9969	PAR-CLIP	21572407	Unspecified
	hsa-mir-224-5p	MIMAT0000281	HIPK3	10114	HITS-CLIP	19536157	Unspecified
	hsa-mir-224-5p	MIMAT0000281	FEM1B	10116	PAR-CLIP	21572407|20371350	Unspecified
	hsa-mir-224-5p	MIMAT0000281	LHFPL2	10184	HITS-CLIP	23824327	Unspecified
	hsa-mir-224-5p	MIMAT0000281	TRIB1	10221	Luciferase reporter assay//Microarray/In situ hybridization//qRT-PCR//Western blot	24382668	Unspecified
	hsa-mir-224-5p	MIMAT0000281	COQ7	10229	HITS-CLIP	23824327	Unspecified
	hsa-mir-224-5p	MIMAT0000281	TXNIP	10628	PAR-CLIP	23446348|27292025	Unspecified
	hsa-mir-224-5p	MIMAT0000281	KDELR1	10945	HITS-CLIP	23313552	Unspecified
	hsa-mir-224-5p	MIMAT0000281	ADAP1	11033	PAR-CLIP	23446348|22012620|20371350	Unspecified
	hsa-mir-224-5p	MIMAT0000281	ZWINT	11130	PAR-CLIP	23592263|27292025	Unspecified
	hsa-mir-224-5p	MIMAT0000281	RASSF8	11228	ChIP-seq//Luciferase reporter assay//Northern blot//qRT-PCR//Western blot	28173803	Unspecified
	hsa-mir-224-5p	MIMAT0000281	ADNP2	22850	CLASH	23622248	Unspecified
	hsa-mir-224-5p	MIMAT0000281	PHLPP2	23035	Immunofluorescence//Luciferase reporter assay//qRT-PCR//Western blot	26245343	Unspecified
	hsa-mir-224-5p	MIMAT0000281	NCOA6	23054	Luciferase reporter assay	20065103	Unspecified
	hsa-mir-224-5p	MIMAT0000281	GGA2	23062	HITS-CLIP	27418678	Unspecified
	hsa-mir-224-5p	MIMAT0000281	PHLPP1	23239	Immunofluorescence//Immunoprecipitaion//Luciferase reporter assay//qRT-PCR//Western blot	23846336|26245343	Unspecified
	hsa-mir-224-5p	MIMAT0000281	ITGB3BP	23421	PAR-CLIP	22012620	Unspecified
	hsa-mir-224-5p	MIMAT0000281	KCTD2	23510	PAR-CLIP	24398324|21572407	Unspecified
	hsa-mir-224-5p	MIMAT0000281	RABGAP1	23637	PAR-CLIP	27292025	Unspecified
	hsa-mir-224-5p	MIMAT0000281	GABARAPL3	23766	HITS-CLIP	23824327	Unspecified
	hsa-mir-224-5p	MIMAT0000281	NPTN	27020	PAR-CLIP	21572407	Unspecified
	hsa-mir-224-5p	MIMAT0000281	TNRC6A	27327	PAR-CLIP	24398324	Unspecified
	hsa-mir-224-5p	MIMAT0000281	MYLIP	29116	PAR-CLIP	20371350	Unspecified
	hsa-mir-224-5p	MIMAT0000281	ASCC1	51008	HITS-CLIP	19536157	Unspecified
	hsa-mir-224-5p	MIMAT0000281	RAB9B	51209	Microarray//Northern blot	16331254	Unspecified
	hsa-mir-224-5p	MIMAT0000281	IL20RB	53833	HITS-CLIP	19536157	Unspecified
	hsa-mir-224-5p	MIMAT0000281	C21orf91	54149	HITS-CLIP	27418678	Unspecified
	hsa-mir-224-5p	MIMAT0000281	RETSAT	54884	PAR-CLIP	27292025	Unspecified
	hsa-mir-224-5p	MIMAT0000281	PELI1	57162	HITS-CLIP	23824327	Unspecified
	hsa-mir-224-5p	MIMAT0000281	SLC12A5	57468	PAR-CLIP	24398324	Unspecified
	hsa-mir-224-5p	MIMAT0000281	NUFIP2	57532	PAR-CLIP	23592263	Unspecified
	hsa-mir-224-5p	MIMAT0000281	SLC7A14	57709	PAR-CLIP	23446348	Unspecified
	hsa-mir-224-5p	MIMAT0000281	CACNG7	59284	PAR-CLIP	23446348|22012620|20371350	Unspecified
	hsa-mir-224-5p	MIMAT0000281	GNB4	59345	HITS-CLIP	23824327	Unspecified
	hsa-mir-224-5p	MIMAT0000281	GIGYF1	64599	PAR-CLIP	23592263	Unspecified
	hsa-mir-224-5p	MIMAT0000281	PRRG4	79056	PAR-CLIP	20371350	Unspecified
	hsa-mir-224-5p	MIMAT0000281	CHAC1	79094	PAR-CLIP	21572407|20371350	Unspecified
	hsa-mir-224-5p	MIMAT0000281	AKIRIN1	79647	PAR-CLIP	23592263|24398324|22012620|21572407|20371350	Unspecified
	hsa-mir-224-5p	MIMAT0000281	C12orf49	79794	PAR-CLIP	20371350	Unspecified
	hsa-mir-224-5p	MIMAT0000281	COASY	80347	PAR-CLIP	20371350	Unspecified
	hsa-mir-224-5p	MIMAT0000281	STARD5	80765	PAR-CLIP	22012620	Unspecified
	hsa-mir-224-5p	MIMAT0000281	KBTBD8	84541	PAR-CLIP	23446348|21572407	Unspecified
	hsa-mir-224-5p	MIMAT0000281	PIGO	84720	HITS-CLIP	23313552	Unspecified
	hsa-mir-224-5p	MIMAT0000281	ZNF585B	92285	PAR-CLIP	21572407	Unspecified
	hsa-mir-224-5p	MIMAT0000281	GORAB	92344	HITS-CLIP	23824327	Unspecified
	hsa-mir-224-5p	MIMAT0000281	TADA2B	93624	PAR-CLIP	23592263	Unspecified
	hsa-mir-224-5p	MIMAT0000281	KRT74	121391	HITS-CLIP	23824327	Unspecified
	hsa-mir-224-5p	MIMAT0000281	ZNF573	126231	PAR-CLIP	23592263	Unspecified
	hsa-mir-224-5p	MIMAT0000281	GRPEL2	134266	PAR-CLIP	20371350	Unspecified
	hsa-mir-224-5p	MIMAT0000281	TOM1L2	146691	PAR-CLIP	23708386	Unspecified
	hsa-mir-224-5p	MIMAT0000281	B3GALNT2	148789	PAR-CLIP	27292025	Unspecified
	hsa-mir-224-5p	MIMAT0000281	FAM84B	157638	PAR-CLIP	22012620	Unspecified
	hsa-mir-224-5p	MIMAT0000281	TMTC3	160418	PAR-CLIP	23592263	Unspecified
	hsa-mir-224-5p	MIMAT0000281	LONRF2	164832	HITS-CLIP	23824327	Unspecified
	hsa-mir-224-5p	MIMAT0000281	SLC41A1	254428	HITS-CLIP	23824327	Unspecified
	hsa-mir-224-5p	MIMAT0000281	C8orf46	254778	HITS-CLIP	23824327	Unspecified
	hsa-mir-224-5p	MIMAT0000281	SLC46A3	283537	PAR-CLIP	24398324	Unspecified
	hsa-mir-224-5p	MIMAT0000281	FRYL	285527	PAR-CLIP	26701625	Unspecified
	hsa-mir-224-5p	MIMAT0000281	RAB15	376267	PAR-CLIP	23592263|22012620	Unspecified
	hsa-mir-224-5p	MIMAT0000281	C17orf82	388407	PAR-CLIP	22012620	Unspecified
	hsa-mir-224-5p	MIMAT0000281	VGLL3	389136	HITS-CLIP	28735896	Unspecified
	hsa-mir-224-5p	MIMAT0000281	F8A2	474383	PAR-CLIP	23446348	Unspecified
	hsa-mir-224-5p	MIMAT0000281	F8A3	474384	PAR-CLIP	23446348	Unspecified
	hsa-mir-135a-5p	MIMAT0000428	APC	324	Luciferase reporter assay//qRT-PCR	18632633	Unspecified
	hsa-mir-135a-5p	MIMAT0000428	BIRC5	332	PAR-CLIP	23446348|21572407|20371350	Unspecified
	hsa-mir-135a-5p	MIMAT0000428	APOA1	335	PAR-CLIP	22100165	Unspecified
	hsa-mir-135a-5p	MIMAT0000428	AZF1	560	HITS-CLIP	23313552	Unspecified
	hsa-mir-135a-5p	MIMAT0000428	BCL2	596	Luciferase reporter assay//qRT-PCR	25230140	Unspecified
	hsa-mir-135a-5p	MIMAT0000428	BMPR2	659	Luciferase reporter assay//qRT-PCR//Western blot	22139076	Unspecified
	hsa-mir-135a-5p	MIMAT0000428	CAPZA2	830	PAR-CLIP	20371350	Unspecified
	hsa-mir-135a-5p	MIMAT0000428	RUNX2	860	Luciferase reporter assay//qRT-PCR//Western blot	25634212	Unspecified
	hsa-mir-135a-5p	MIMAT0000428	CDR1	1038	PAR-CLIP	22100165	Unspecified
	hsa-mir-135a-5p	MIMAT0000428	CEBPD	1052	Luciferase reporter assay//Microarray//qRT-PCR//Western blot	25554493	Unspecified
	hsa-mir-135a-5p	MIMAT0000428	COX6B1	1340	HITS-CLIP	23706177	Unspecified
	hsa-mir-135a-5p	MIMAT0000428	E2F1	1869	Flow//Immunoprecipitaion//Luciferase reporter assay//Microarray//qRT-PCR//Western blot	27683111	Unspecified
	hsa-mir-135a-5p	MIMAT0000428	EGFR	1956	Luciferase reporter assay//Western blot	27524492	Unspecified
	hsa-mir-135a-5p	MIMAT0000428	ESRRA	2101	Luciferase reporter assay//qRT-PCR//Western blot	27227989	Unspecified
	hsa-mir-135a-5p	MIMAT0000428	FOXO1	2308	Luciferase reporter assay//qRT-PCR//Western blot	25888950|26261511|27486383	Unspecified
	hsa-mir-135a-5p	MIMAT0000428	GAGE1	2543	PAR-CLIP	22100165	Unspecified
	hsa-mir-135a-5p	MIMAT0000428	GATA6	2627	PAR-CLIP	22291592|22012620	Unspecified
	hsa-mir-135a-5p	MIMAT0000428	GNL1	2794	PAR-CLIP	22012620	Unspecified
	hsa-mir-135a-5p	MIMAT0000428	HMGB2	3148	PAR-CLIP	20371350	Unspecified
	hsa-mir-135a-5p	MIMAT0000428	HOXA10	3206	Luciferase reporter assay//qRT-PCR//Western blot	22439757|24607788	Unspecified
	hsa-mir-135a-5p	MIMAT0000428	HTR1A	3350	Luciferase reporter assay	24952960	Unspecified
	hsa-mir-135a-5p	MIMAT0000428	JAK2	3717	Luciferase reporter assay//qRT-PCR//Western blot	19666866|22310976	Unspecified
	hsa-mir-135a-5p	MIMAT0000428	LDHA	3939	HITS-CLIP	27418678	Unspecified
	hsa-mir-135a-5p	MIMAT0000428	MARCKS	4082	HITS-CLIP//PAR-CLIP	23446348|21572407	Unspecified
	hsa-mir-135a-5p	MIMAT0000428	SMAD5	4090	Luciferase reporter assay//qRT-PCR//Western blot	22139076|27293991	Unspecified
	hsa-mir-135a-5p	MIMAT0000428	MBNL1	4154	HITS-CLIP	23313552	Unspecified
	hsa-mir-135a-5p	MIMAT0000428	NR3C2	4306	Luciferase reporter assay//qRT-PCR	19944075	Unspecified
	hsa-mir-135a-5p	MIMAT0000428	MMP11	4320	ChIP-seq//Luciferase reporter assay//qRT-PCR//Western blot	27323416	Unspecified
	hsa-mir-135a-5p	MIMAT0000428	MPL	4352	HITS-CLIP	23313552	Unspecified
	hsa-mir-135a-5p	MIMAT0000428	MYC	4609	HITS-CLIP//Luciferase reporter assay//PAR-CLIP//Western blot	23176581|24398324|21572407|20371350|26701625	Unspecified
	hsa-mir-135a-5p	MIMAT0000428	NHS	4810	PAR-CLIP	23446348	Unspecified
	hsa-mir-135a-5p	MIMAT0000428	POLH	5429	PAR-CLIP	27292025	Unspecified
	hsa-mir-135a-5p	MIMAT0000428	PTK2	5747	ChIP-seq//Immunohistochemistry//Luciferase reporter assay//qRT-PCR//Western blot	28415713	Unspecified
	hsa-mir-135a-5p	MIMAT0000428	PTPRD	5789	Luciferase reporter assay//qRT-PCR	28159835	Unspecified
	hsa-mir-135a-5p	MIMAT0000428	PEX2	5828	HITS-CLIP	23824327	Unspecified
	hsa-mir-135a-5p	MIMAT0000428	ROCK1	6093	Immunohistochemistry//Luciferase reporter assay//qRT-PCR//Western blot	24465504|25065599	Unspecified
	hsa-mir-135a-5p	MIMAT0000428	SIAH1	6477	Luciferase reporter assay	24503442	Unspecified
	hsa-mir-135a-5p	MIMAT0000428	SKIL	6498	HITS-CLIP	23313552	Unspecified
	hsa-mir-135a-5p	MIMAT0000428	SLC6A4	6532	Luciferase reporter assay	24952960	Unspecified
	hsa-mir-135a-5p	MIMAT0000428	SRC	6714	Immunoblot//Microarray	26364608	Unspecified
	hsa-mir-135a-5p	MIMAT0000428	STAT6	6778	Luciferase reporter assay//qRT-PCR//Western blot	22139076|27293991	Unspecified
	hsa-mir-135a-5p	MIMAT0000428	TRAF6	7189	PAR-CLIP	26701625	Unspecified
	hsa-mir-135a-5p	MIMAT0000428	VLDLR	7436	Luciferase reporter assay//qRT-PCR//Western blot	24903309	Unspecified
	hsa-mir-135a-5p	MIMAT0000428	XBP1P1	7495	PAR-CLIP	24398324|23446348|21572407|20371350	Unspecified
	hsa-mir-135a-5p	MIMAT0000428	ST8SIA4	7903	HITS-CLIP	23824327	Unspecified
	hsa-mir-135a-5p	MIMAT0000428	PIP5K1A	8394	PAR-CLIP	22100165	Unspecified
	hsa-mir-135a-5p	MIMAT0000428	IRS2	8660	Luciferase reporter assay	23579070	Unspecified
	hsa-mir-135a-5p	MIMAT0000428	KLF4	9314	Luciferase reporter assay//qRT-PCR//Western blot	27302923	Unspecified
	hsa-mir-135a-5p	MIMAT0000428	ROCK2	9475	Luciferase reporter assay//qRT-PCR//Western blot	25065599	Unspecified
	hsa-mir-135a-5p	MIMAT0000428	CEP135	9662	HITS-CLIP	23313552	Unspecified
	hsa-mir-135a-5p	MIMAT0000428	MTSS1	9788	Luciferase reporter assay//qRT-PCR//Western blot	23017832	Unspecified
	hsa-mir-135a-5p	MIMAT0000428	TSC22D2	9819	HITS-CLIP	23313552	Unspecified
	hsa-mir-135a-5p	MIMAT0000428	TRIM66	9866	HITS-CLIP	19536157	Unspecified
	hsa-mir-135a-5p	MIMAT0000428	TOX4	9878	PAR-CLIP	22100165	Unspecified
	hsa-mir-135a-5p	MIMAT0000428	NSA2	10412	HITS-CLIP	23313552	Unspecified
	hsa-mir-135a-5p	MIMAT0000428	TXNIP	10628	Luciferase reporter assay//PAR-CLIP	24398324|23446348|21572407|20371350|26885264	Unspecified
	hsa-mir-135a-5p	MIMAT0000428	KLF8	11279	Luciferase reporter assay//qRT-PCR//Western blot	26235874	Unspecified
	hsa-mir-135a-5p	MIMAT0000428	PPM1E	22843	Luciferase reporter assay	27793001	Unspecified
	hsa-mir-135a-5p	MIMAT0000428	PHLPP2	23035	Luciferase reporter assay//qRT-PCR//Western blot	25888950	Unspecified
	hsa-mir-135a-5p	MIMAT0000428	ZNF609	23060	PAR-CLIP	26701625	Unspecified
	hsa-mir-135a-5p	MIMAT0000428	ARC	23237	PAR-CLIP	21572407	Unspecified
	hsa-mir-135a-5p	MIMAT0000428	DAPK2	23604	Flow//Immunoprecipitaion//Luciferase reporter assay//Microarray//qRT-PCR//Western blot	27683111	Unspecified
	hsa-mir-135a-5p	MIMAT0000428	IL17RA	23765	PAR-CLIP	22100165	Unspecified
	hsa-mir-135a-5p	MIMAT0000428	RAB3GAP2	25782	HITS-CLIP	23824327	Unspecified
	hsa-mir-135a-5p	MIMAT0000428	SLC39A6	25800	PAR-CLIP	21572407	Unspecified
	hsa-mir-135a-5p	MIMAT0000428	SNED1	25992	HITS-CLIP	19536157	Unspecified
	hsa-mir-135a-5p	MIMAT0000428	HEYL	26508	PAR-CLIP	21572407	Unspecified
	hsa-mir-135a-5p	MIMAT0000428	TNPO2	30000	HITS-CLIP	23824327	Unspecified
	hsa-mir-135a-5p	MIMAT0000428	AMOTL2	51421	HITS-CLIP	19536157	Unspecified
	hsa-mir-135a-5p	MIMAT0000428	ZNF107	51427	HITS-CLIP//PAR-CLIP	20371350|23313552	Unspecified
	hsa-mir-135a-5p	MIMAT0000428	PIAS4	51588	HITS-CLIP	23824327	Unspecified
	hsa-mir-135a-5p	MIMAT0000428	DPP8	54878	PAR-CLIP	22012620	Unspecified
	hsa-mir-135a-5p	MIMAT0000428	LAX1	54900	HITS-CLIP	23824327	Unspecified
	hsa-mir-135a-5p	MIMAT0000428	VNN 3.00	55350	PAR-CLIP	22100165	Unspecified
	hsa-mir-135a-5p	MIMAT0000428	CENPN	55839	HITS-CLIP	23824327	Unspecified
	hsa-mir-135a-5p	MIMAT0000428	SCYL3	57147	HITS-CLIP	23824327|27418678|28735896	Unspecified
	hsa-mir-135a-5p	MIMAT0000428	KIAA1143	57456	PAR-CLIP	21572407|20371350	Unspecified
	hsa-mir-135a-5p	MIMAT0000428	NUFIP2	57532	PAR-CLIP	23592263	Unspecified
	hsa-mir-135a-5p	MIMAT0000428	RBAK	57786	ChIP-seq//Luciferase reporter assay//qRT-PCR//Western blot	27323416	Unspecified
	hsa-mir-135a-5p	MIMAT0000428	PCTP	58488	HITS-CLIP	19536157	Unspecified
	hsa-mir-135a-5p	MIMAT0000428	TTLL7	79739	PAR-CLIP	22100165	Unspecified
	hsa-mir-135a-5p	MIMAT0000428	SLC19A3	80704	HITS-CLIP	23706177	Unspecified
	hsa-mir-135a-5p	MIMAT0000428	TRIM4	89122	PAR-CLIP	22012620|20371350	Unspecified
	hsa-mir-135a-5p	MIMAT0000428	ZNF468	90333	PAR-CLIP	20371350	Unspecified
	hsa-mir-135a-5p	MIMAT0000428	LRRC15	131578	HITS-CLIP	23824327	Unspecified
	hsa-mir-135a-5p	MIMAT0000428	KIAA1958	158405	PAR-CLIP	22291592	Unspecified
	hsa-mir-135a-5p	MIMAT0000428	ZNF846	162993	PAR-CLIP	20371350	Unspecified
	hsa-mir-135a-5p	MIMAT0000428	KIF6	221458	PAR-CLIP	22100165	Unspecified
	hsa-mir-135a-5p	MIMAT0000428	ATXN7L1	222255	HITS-CLIP	27418678	Unspecified
	hsa-mir-135a-5p	MIMAT0000428	CCDC85C	317762	HITS-CLIP	23824327|19536157	Unspecified
	hsa-mir-135a-5p	MIMAT0000428	ZNF805	390980	PAR-CLIP	23446348	Unspecified
	hsa-mir-135a-5p	MIMAT0000428	GPX8	493869	HITS-CLIP	23824327	Unspecified
	hsa-mir-135a-5p	MIMAT0000428	PCP4L1	654790	PAR-CLIP	22100165	Unspecified
	hsa-mir-135a-5p	MIMAT0000428	WDR82P1	728505	HITS-CLIP	19536157	Unspecified
	hsa-mir-423-3p	MIMAT0001340	ADCY1	107	CLASH	23622248	Unspecified
	hsa-mir-423-3p	MIMAT0001340	AKT2	208	CLASH	23622248	Unspecified
	hsa-mir-423-3p	MIMAT0001340	ALAS1	211	CLASH	23622248	Unspecified
	hsa-mir-423-3p	MIMAT0001340	SLC25A6	293	CLASH	23622248	Unspecified
	hsa-mir-423-3p	MIMAT0001340	NUDT2	318	CLASH	23622248	Unspecified
	hsa-mir-423-3p	MIMAT0001340	APP	351	CLASH	23622248	Unspecified
	hsa-mir-423-3p	MIMAT0001340	KIF1A	547	CLASH	23622248	Unspecified
	hsa-mir-423-3p	MIMAT0001340	CALR	811	CLASH	23622248	Unspecified
	hsa-mir-423-3p	MIMAT0001340	CCNT2	905	CLASH	23622248	Unspecified
	hsa-mir-423-3p	MIMAT0001340	CDK7	1022	CLASH	23622248	Unspecified
	hsa-mir-423-3p	MIMAT0001340	CDKN1A	1026	Luciferase reporter assay//qRT-PCR//Western blot	20190813	Unspecified
	hsa-mir-423-3p	MIMAT0001340	AP2M1	1173	CLASH	23622248	Unspecified
	hsa-mir-423-3p	MIMAT0001340	COPA	1314	CLASH	23622248	Unspecified
	hsa-mir-423-3p	MIMAT0001340	CRK	1398	PAR-CLIP	20371350	Unspecified
	hsa-mir-423-3p	MIMAT0001340	DPYSL3	1809	CLASH	23622248	Unspecified
	hsa-mir-423-3p	MIMAT0001340	EEF1A1	1915	CLASH	23622248	Unspecified
	hsa-mir-423-3p	MIMAT0001340	EIF4B	1975	CLASH	23622248	Unspecified
	hsa-mir-423-3p	MIMAT0001340	EIF5A	1984	CLASH	23622248	Unspecified
	hsa-mir-423-3p	MIMAT0001340	ESRRA	2101	Sequencing	20371350	Unspecified
	hsa-mir-423-3p	MIMAT0001340	ETF1	2107	CLASH	23622248	Unspecified
	hsa-mir-423-3p	MIMAT0001340	EWSR1	2130	CLASH	23622248	Unspecified
	hsa-mir-423-3p	MIMAT0001340	F2	2147	HITS-CLIP//PAR-CLIP	23446348|21572407	Unspecified
	hsa-mir-423-3p	MIMAT0001340	FASN	2194	CLASH	23622248	Unspecified
	hsa-mir-423-3p	MIMAT0001340	FLII	2314	CLASH	23622248	Unspecified
	hsa-mir-423-3p	MIMAT0001340	FLOT2	2319	CLASH	23622248	Unspecified
	hsa-mir-423-3p	MIMAT0001340	KDSR	2531	CLASH	23622248	Unspecified
	hsa-mir-423-3p	MIMAT0001340	XRCC6	2547	CLASH	23622248	Unspecified
	hsa-mir-423-3p	MIMAT0001340	GLDC	2731	CLASH	23622248	Unspecified
	hsa-mir-423-3p	MIMAT0001340	GPS1	2873	CLASH	23622248	Unspecified
	hsa-mir-423-3p	MIMAT0001340	H1F0	3005	CLASH	23622248	Unspecified
	hsa-mir-423-3p	MIMAT0001340	HDLBP	3069	CLASH	23622248	Unspecified
	hsa-mir-423-3p	MIMAT0001340	HLA-C	3107	CLASH	23622248	Unspecified
	hsa-mir-423-3p	MIMAT0001340	HOXD13	3239	CLASH	23622248	Unspecified
	hsa-mir-423-3p	MIMAT0001340	HSPA1B	3304	CLASH	23622248	Unspecified
	hsa-mir-423-3p	MIMAT0001340	IGF2R	3482	CLASH	23622248	Unspecified
	hsa-mir-423-3p	MIMAT0001340	INCENP	3619	CLASH	23622248	Unspecified
	hsa-mir-423-3p	MIMAT0001340	IRAK1	3654	CLASH	23622248	Unspecified
	hsa-mir-423-3p	MIMAT0001340	MCM2	4171	CLASH	23622248	Unspecified
	hsa-mir-423-3p	MIMAT0001340	MAP3K1	4214	CLASH	23622248	Unspecified
	hsa-mir-423-3p	MIMAT0001340	MAP3K9	4293	HITS-CLIP	19536157	Unspecified
	hsa-mir-423-3p	MIMAT0001340	CYTB	4519	CLASH	23622248	Unspecified
	hsa-mir-423-3p	MIMAT0001340	MTHFR	4524	CLASH	23622248	Unspecified
	hsa-mir-423-3p	MIMAT0001340	MYB	4602	CLASH	23622248	Unspecified
	hsa-mir-423-3p	MIMAT0001340	NUBP1	4682	CLASH	23622248	Unspecified
	hsa-mir-423-3p	MIMAT0001340	NPTX2	4885	CLASH	23622248	Unspecified
	hsa-mir-423-3p	MIMAT0001340	SLC11A2	4891	Sequencing	20371350	Unspecified
	hsa-mir-423-3p	MIMAT0001340	PA2G4	5036	Luciferase reporter assay//qRT-PCR//Western blot	25926693	Unspecified
	hsa-mir-423-3p	MIMAT0001340	PABPC3	5042	HITS-CLIP//PAR-CLIP	24398324|23446348|21572407|20371350	Unspecified
	hsa-mir-423-3p	MIMAT0001340	PDCL	5082	CLASH	23622248	Unspecified
	hsa-mir-423-3p	MIMAT0001340	PEPD	5184	CLASH	23622248	Unspecified
	hsa-mir-423-3p	MIMAT0001340	PFKL	5211	CLASH	23622248	Unspecified
	hsa-mir-423-3p	MIMAT0001340	PKM	5315	CLASH	23622248	Unspecified
	hsa-mir-423-3p	MIMAT0001340	PML	5371	CLASH	23622248	Unspecified
	hsa-mir-423-3p	MIMAT0001340	POLR2L	5441	CLASH	23622248	Unspecified
	hsa-mir-423-3p	MIMAT0001340	PPP2R1B	5519	CLASH	23622248	Unspecified
	hsa-mir-423-3p	MIMAT0001340	MAPK3	5595	CLASH	23622248	Unspecified
	hsa-mir-423-3p	MIMAT0001340	PSMB5	5693	CLASH	23622248	Unspecified
	hsa-mir-423-3p	MIMAT0001340	PSMD1	5707	CLASH	23622248	Unspecified
	hsa-mir-423-3p	MIMAT0001340	PSMD8	5714	CLASH	23622248	Unspecified
	hsa-mir-423-3p	MIMAT0001340	PTMA	5757	HITS-CLIP//PAR-CLIP	24398324|23446348|21572407|20371350	Unspecified
	hsa-mir-423-3p	MIMAT0001340	PTMS	5763	CLASH	23622248	Unspecified
	hsa-mir-423-3p	MIMAT0001340	PTPRK	5796	CLASH	23622248	Unspecified
	hsa-mir-423-3p	MIMAT0001340	RANBP2	5903	CLASH	23622248	Unspecified
	hsa-mir-423-3p	MIMAT0001340	RBBP4	5928	CLASH	23622248	Unspecified
	hsa-mir-423-3p	MIMAT0001340	UPF1	5976	CLASH	23622248	Unspecified
	hsa-mir-423-3p	MIMAT0001340	ROBO1	6091	CLASH	23622248	Unspecified
	hsa-mir-423-3p	MIMAT0001340	RPL3	6122	CLASH	23622248	Unspecified
	hsa-mir-423-3p	MIMAT0001340	RPL4	6124	CLASH	23622248	Unspecified
	hsa-mir-423-3p	MIMAT0001340	RPL26	6154	CLASH	23622248	Unspecified
	hsa-mir-423-3p	MIMAT0001340	RPLP1	6176	CLASH	23622248	Unspecified
	hsa-mir-423-3p	MIMAT0001340	MRPL12	6182	CLASH	23622248	Unspecified
	hsa-mir-423-3p	MIMAT0001340	RPS2	6187	CLASH	23622248	Unspecified
	hsa-mir-423-3p	MIMAT0001340	RXRA	6256	CLASH	23622248	Unspecified
	hsa-mir-423-3p	MIMAT0001340	ATXN7	6314	Sequencing	20371350	Unspecified
	hsa-mir-423-3p	MIMAT0001340	SET	6418	CLASH	23622248	Unspecified
	hsa-mir-423-3p	MIMAT0001340	SRSF1	6426	CLASH	23622248	Unspecified
	hsa-mir-423-3p	MIMAT0001340	SHMT2	6472	CLASH	23622248	Unspecified
	hsa-mir-423-3p	MIMAT0001340	SMARCA2	6595	CLASH	23622248	Unspecified
	hsa-mir-423-3p	MIMAT0001340	SMARCD2	6603	CLASH	23622248	Unspecified
	hsa-mir-423-3p	MIMAT0001340	SPTBN1	6711	CLASH	23622248	Unspecified
	hsa-mir-423-3p	MIMAT0001340	SRPRA	6734	CLASH	23622248	Unspecified
	hsa-mir-423-3p	MIMAT0001340	TBCE	6905	CLASH	23622248	Unspecified
	hsa-mir-423-3p	MIMAT0001340	TLE1	7088	CLASH	23622248	Unspecified
	hsa-mir-423-3p	MIMAT0001340	TRPM2	7226	CLASH	23622248	Unspecified
	hsa-mir-423-3p	MIMAT0001340	UQCRB	7381	CLASH	23622248	Unspecified
	hsa-mir-423-3p	MIMAT0001340	VEGFA	7422	HITS-CLIP//PAR-CLIP	23592263|24398324|23446348|22012620|21572407|20371350	Unspecified
	hsa-mir-423-3p	MIMAT0001340	NSD2	7468	CLASH	23622248	Unspecified
	hsa-mir-423-3p	MIMAT0001340	MOGS	7841	CLASH	23622248	Unspecified
	hsa-mir-423-3p	MIMAT0001340	SMC1A	8243	CLASH	23622248	Unspecified
	hsa-mir-423-3p	MIMAT0001340	NAA10	8260	CLASH	23622248	Unspecified
	hsa-mir-423-3p	MIMAT0001340	HIST1H3D	8351	CLASH	23622248	Unspecified
	hsa-mir-423-3p	MIMAT0001340	TAGLN2	8407	CLASH	23622248	Unspecified
	hsa-mir-423-3p	MIMAT0001340	RRP1	8568	CLASH	23622248	Unspecified
	hsa-mir-423-3p	MIMAT0001340	EIF3B	8662	CLASH	23622248	Unspecified
	hsa-mir-423-3p	MIMAT0001340	EIF3C	8663	CLASH	23622248	Unspecified
	hsa-mir-423-3p	MIMAT0001340	SUCLG1	8802	CLASH	23622248	Unspecified
	hsa-mir-423-3p	MIMAT0001340	BAZ1B	9031	CLASH	23622248	Unspecified
	hsa-mir-423-3p	MIMAT0001340	ATP6V0D1	9114	CLASH	23622248	Unspecified
	hsa-mir-423-3p	MIMAT0001340	HGS	9146	CLASH	23622248	Unspecified
	hsa-mir-423-3p	MIMAT0001340	LPAR2	9170	PAR-CLIP	23592263	Unspecified
	hsa-mir-423-3p	MIMAT0001340	ARHGEF2	9181	CLASH	23622248	Unspecified
	hsa-mir-423-3p	MIMAT0001340	MTA2	9219	CLASH	23622248	Unspecified
	hsa-mir-423-3p	MIMAT0001340	TCEAL1	9338	Luciferase reporter assay//Western blot	26402653	Unspecified
	hsa-mir-423-3p	MIMAT0001340	FADS2	9415	CLASH	23622248	Unspecified
	hsa-mir-423-3p	MIMAT0001340	NTN1	9423	CLASH	23622248	Unspecified
	hsa-mir-423-3p	MIMAT0001340	RPH3AL	9501	PAR-CLIP	27292025	Unspecified
	hsa-mir-423-3p	MIMAT0001340	NPEPPS	9520	CLASH	23622248	Unspecified
	hsa-mir-423-3p	MIMAT0001340	PUM1	9698	Sequencing	20371350	Unspecified
	hsa-mir-423-3p	MIMAT0001340	TATDN2	9797	Sequencing	20371350	Unspecified
	hsa-mir-423-3p	MIMAT0001340	URB2	9816	CLASH	23622248	Unspecified
	hsa-mir-423-3p	MIMAT0001340	NUP58	9818	CLASH	23622248	Unspecified
	hsa-mir-423-3p	MIMAT0001340	LRIG2	9860	HITS-CLIP	23824327	Unspecified
	hsa-mir-423-3p	MIMAT0001340	DDX46	9879	CLASH	23622248	Unspecified
	hsa-mir-423-3p	MIMAT0001340	POM121	9883	CLASH	23622248	Unspecified
	hsa-mir-423-3p	MIMAT0001340	BCL2L11	10018	Immunohistochemistry//Luciferase reporter assay//qRT-PCR//Western blot	28254439	Unspecified
	hsa-mir-423-3p	MIMAT0001340	SLC25A15	10166	CLASH	23622248	Unspecified
	hsa-mir-423-3p	MIMAT0001340	SF3B4	10262	CLASH	23622248	Unspecified
	hsa-mir-423-3p	MIMAT0001340	UBE4B	10277	CLASH	23622248	Unspecified
	hsa-mir-423-3p	MIMAT0001340	SCML2	10389	CLASH	23622248	Unspecified
	hsa-mir-423-3p	MIMAT0001340	KDELR1	10945	CLASH//HITS-CLIP	23622248|23824327	Unspecified
	hsa-mir-423-3p	MIMAT0001340	HNRNPA0	10949	CLASH	23622248	Unspecified
	hsa-mir-423-3p	MIMAT0001340	YWHAQ	10971	CLASH	23622248	Unspecified
	hsa-mir-423-3p	MIMAT0001340	GCN1	10985	CLASH	23622248	Unspecified
	hsa-mir-423-3p	MIMAT0001340	KIF2C	11004	PAR-CLIP//Sequencing	20371350|23592263	Unspecified
	hsa-mir-423-3p	MIMAT0001340	PAPD7	11044	Sequencing	20371350	Unspecified
	hsa-mir-423-3p	MIMAT0001340	HNRNPUL1	11100	CLASH	23622248	Unspecified
	hsa-mir-423-3p	MIMAT0001340	LYPLA2	11313	CLASH	23622248	Unspecified
	hsa-mir-423-3p	MIMAT0001340	SPEN	23013	CLASH	23622248	Unspecified
	hsa-mir-423-3p	MIMAT0001340	CNOT1	23019	CLASH	23622248	Unspecified
	hsa-mir-423-3p	MIMAT0001340	ZC3H4	23211	Sequencing	20371350	Unspecified
	hsa-mir-423-3p	MIMAT0001340	NUP210	23225	CLASH	23622248	Unspecified
	hsa-mir-423-3p	MIMAT0001340	SZT2	23334	CLASH	23622248	Unspecified
	hsa-mir-423-3p	MIMAT0001340	SF3B3	23450	CLASH	23622248	Unspecified
	hsa-mir-423-3p	MIMAT0001340	SF3B1	23451	CLASH	23622248	Unspecified
	hsa-mir-423-3p	MIMAT0001340	QPRT	23475	CLASH	23622248	Unspecified
	hsa-mir-423-3p	MIMAT0001340	LRRC8B	23507	CLASH	23622248	Unspecified
	hsa-mir-423-3p	MIMAT0001340	SUZ12	23512	PAR-CLIP	23592263|21572407	Unspecified
	hsa-mir-423-3p	MIMAT0001340	TNPO3	23534	CLASH	23622248	Unspecified
	hsa-mir-423-3p	MIMAT0001340	ZNF324	25799	CLASH	23622248	Unspecified
	hsa-mir-423-3p	MIMAT0001340	LSM 4.00	25804	CLASH	23622248	Unspecified
	hsa-mir-423-3p	MIMAT0001340	SH2B1	25970	CLASH	23622248	Unspecified
	hsa-mir-423-3p	MIMAT0001340	APPL1	26060	CLASH	23622248	Unspecified
	hsa-mir-423-3p	MIMAT0001340	RAI14	26064	CLASH	23622248	Unspecified
	hsa-mir-423-3p	MIMAT0001340	ABHD12	26090	CLASH	23622248	Unspecified
	hsa-mir-423-3p	MIMAT0001340	NARF	26502	CLASH	23622248	Unspecified
	hsa-mir-423-3p	MIMAT0001340	AGO1	26523	CLASH	23622248	Unspecified
	hsa-mir-423-3p	MIMAT0001340	PABPC1	26986	CLASH//PAR-CLIP	23622248|21572407|20371350|26701625	Unspecified
	hsa-mir-423-3p	MIMAT0001340	CYFIP2	26999	CLASH	23622248	Unspecified
	hsa-mir-423-3p	MIMAT0001340	PELP1	27043	CLASH	23622248	Unspecified
	hsa-mir-423-3p	MIMAT0001340	COMMD9	29099	CLASH	23622248	Unspecified
	hsa-mir-423-3p	MIMAT0001340	RBM15B	29890	CLASH	23622248	Unspecified
	hsa-mir-423-3p	MIMAT0001340	SAC3D1	29901	CLASH	23622248	Unspecified
	hsa-mir-423-3p	MIMAT0001340	STOML2	30968	CLASH	23622248	Unspecified
	hsa-mir-423-3p	MIMAT0001340	IER3IP1	51124	CLASH	23622248	Unspecified
	hsa-mir-423-3p	MIMAT0001340	REEP2	51308	CLASH	23622248	Unspecified
	hsa-mir-423-3p	MIMAT0001340	RTCB	51493	CLASH	23622248	Unspecified
	hsa-mir-423-3p	MIMAT0001340	DDX56	54606	CLASH	23622248	Unspecified
	hsa-mir-423-3p	MIMAT0001340	FBXL19	54620	CLASH	23622248	Unspecified
	hsa-mir-423-3p	MIMAT0001340	NDE1	54820	CLASH	23622248	Unspecified
	hsa-mir-423-3p	MIMAT0001340	CHCHD3	54927	CLASH	23622248	Unspecified
	hsa-mir-423-3p	MIMAT0001340	C1orf56	54964	CLASH	23622248	Unspecified
	hsa-mir-423-3p	MIMAT0001340	AKIRIN2	55122	PAR-CLIP	21572407	Unspecified
	hsa-mir-423-3p	MIMAT0001340	LARP1B	55132	CLASH	23622248	Unspecified
	hsa-mir-423-3p	MIMAT0001340	MRPS18A	55168	CLASH	23622248	Unspecified
	hsa-mir-423-3p	MIMAT0001340	SETD5	55209	PAR-CLIP	21572407	Unspecified
	hsa-mir-423-3p	MIMAT0001340	FEM1A	55527	CLASH	23622248	Unspecified
	hsa-mir-423-3p	MIMAT0001340	TBC1D22B	55633	HITS-CLIP	19536157	Unspecified
	hsa-mir-423-3p	MIMAT0001340	SLC30A6	55676	CLASH	23622248	Unspecified
	hsa-mir-423-3p	MIMAT0001340	FRMD4A	55691	CLASH	23622248	Unspecified
	hsa-mir-423-3p	MIMAT0001340	ARFGAP1	55738	CLASH	23622248	Unspecified
	hsa-mir-423-3p	MIMAT0001340	FOXJ2	55810	CLASH	23622248	Unspecified
	hsa-mir-423-3p	MIMAT0001340	PPAN	56342	CLASH	23622248	Unspecified
	hsa-mir-423-3p	MIMAT0001340	TMEM9B	56674	CLASH	23622248	Unspecified
	hsa-mir-423-3p	MIMAT0001340	NAT14	57106	HITS-CLIP	19536157	Unspecified
	hsa-mir-423-3p	MIMAT0001340	SELENON	57190	CLASH	23622248	Unspecified
	hsa-mir-423-3p	MIMAT0001340	ATP8B2	57198	CLASH	23622248	Unspecified
	hsa-mir-423-3p	MIMAT0001340	KIDINS220	57498	CLASH	23622248	Unspecified
	hsa-mir-423-3p	MIMAT0001340	CIP2A	57650	CLASH	23622248	Unspecified
	hsa-mir-423-3p	MIMAT0001340	FBRSL1	57666	CLASH	23622248	Unspecified
	hsa-mir-423-3p	MIMAT0001340	RNF213	57674	CLASH	23622248	Unspecified
	hsa-mir-423-3p	MIMAT0001340	SFMBT2	57713	PAR-CLIP	22012620	Unspecified
	hsa-mir-423-3p	MIMAT0001340	RAP2C	57826	PAR-CLIP//Sequencing	20371350|23446348	Unspecified
	hsa-mir-423-3p	MIMAT0001340	WIZ	58525	CLASH	23622248	Unspecified
	hsa-mir-423-3p	MIMAT0001340	RBSN	64145	CLASH	23622248	Unspecified
	hsa-mir-423-3p	MIMAT0001340	MFSD14A	64645	CLASH	23622248	Unspecified
	hsa-mir-423-3p	MIMAT0001340	C6orf106	64771	CLASH	23622248	Unspecified
	hsa-mir-423-3p	MIMAT0001340	TBC1D15	64786	PAR-CLIP	27292025	Unspecified
	hsa-mir-423-3p	MIMAT0001340	NT5DC2	64943	CLASH	23622248	Unspecified
	hsa-mir-423-3p	MIMAT0001340	WNK1	65125	CLASH	23622248	Unspecified
	hsa-mir-423-3p	MIMAT0001340	CENPM	79019	HITS-CLIP	23313552	Unspecified
	hsa-mir-423-3p	MIMAT0001340	METTL16	79066	CLASH	23622248	Unspecified
	hsa-mir-423-3p	MIMAT0001340	PTCD2	79810	CLASH	23622248	Unspecified
	hsa-mir-423-3p	MIMAT0001340	MCMBP	79892	CLASH	23622248	Unspecified
	hsa-mir-423-3p	MIMAT0001340	KIAA0319L	79932	CLASH	23622248	Unspecified
	hsa-mir-423-3p	MIMAT0001340	FAAP100	80233	CLASH	23622248	Unspecified
	hsa-mir-423-3p	MIMAT0001340	KLHL15	80311	CLASH	23622248	Unspecified
	hsa-mir-423-3p	MIMAT0001340	YIPF5	81555	CLASH	23622248	Unspecified
	hsa-mir-423-3p	MIMAT0001340	PUS3	83480	CLASH	23622248	Unspecified
	hsa-mir-423-3p	MIMAT0001340	AMMECR1L	83607	CLASH	23622248	Unspecified
	hsa-mir-423-3p	MIMAT0001340	CEP78	84131	CLASH	23622248	Unspecified
	hsa-mir-423-3p	MIMAT0001340	USMG5	84833	CLASH	23622248	Unspecified
	hsa-mir-423-3p	MIMAT0001340	ZNF503	84858	CLASH	23622248	Unspecified
	hsa-mir-423-3p	MIMAT0001340	DGCR6L	85359	CLASH	23622248	Unspecified
	hsa-mir-423-3p	MIMAT0001340	MICALL1	85377	CLASH	23622248	Unspecified
	hsa-mir-423-3p	MIMAT0001340	KIAA1671	85379	CLASH	23622248	Unspecified
	hsa-mir-423-3p	MIMAT0001340	EAF1	85403	CLASH	23622248	Unspecified
	hsa-mir-423-3p	MIMAT0001340	CCDC32	90416	HITS-CLIP	27418678	Unspecified
	hsa-mir-423-3p	MIMAT0001340	RNF185	91445	CLASH	23622248	Unspecified
	hsa-mir-423-3p	MIMAT0001340	ZNF561	93134	CLASH	23622248	Unspecified
	hsa-mir-423-3p	MIMAT0001340	MRFAP1	93621	CLASH	23622248	Unspecified
	hsa-mir-423-3p	MIMAT0001340	LARP4	113251	CLASH	23622248	Unspecified
	hsa-mir-423-3p	MIMAT0001340	LYPD1	116372	CLASH	23622248	Unspecified
	hsa-mir-423-3p	MIMAT0001340	UBE2J2	118424	CLASH	23622248	Unspecified
	hsa-mir-423-3p	MIMAT0001340	ZFYVE27	118813	CLASH	23622248	Unspecified
	hsa-mir-423-3p	MIMAT0001340	LRR1	122769	CLASH	23622248	Unspecified
	hsa-mir-423-3p	MIMAT0001340	IRGQ	126298	CLASH	23622248	Unspecified
	hsa-mir-423-3p	MIMAT0001340	C6orf141	135398	HITS-CLIP	23313552	Unspecified
	hsa-mir-423-3p	MIMAT0001340	NACC2	138151	Sequencing	20371350	Unspecified
	hsa-mir-423-3p	MIMAT0001340	RPP25L	138716	CLASH	23622248	Unspecified
	hsa-mir-423-3p	MIMAT0001340	MIB2	142678	CLASH	23622248	Unspecified
	hsa-mir-423-3p	MIMAT0001340	ZNF420	147923	CLASH	23622248	Unspecified
	hsa-mir-423-3p	MIMAT0001340	C22orf42	150297	CLASH	23622248	Unspecified
	hsa-mir-423-3p	MIMAT0001340	ZFPM1	161882	HITS-CLIP	23313552	Unspecified
	hsa-mir-423-3p	MIMAT0001340	POLR3H	171568	CLASH	23622248	Unspecified
	hsa-mir-423-3p	MIMAT0001340	TXLNA	200081	CLASH	23622248	Unspecified
	hsa-mir-423-3p	MIMAT0001340	B4GALNT3	283358	CLASH	23622248	Unspecified
	hsa-mir-423-3p	MIMAT0001340	NOTO	344022	HITS-CLIP	23313552	Unspecified
	hsa-mir-423-3p	MIMAT0001340	POTEG	404785	PAR-CLIP	26701625|27292025	Unspecified
	hsa-mir-423-3p	MIMAT0001340	LURAP1	541468	CLASH	23622248	Unspecified
	hsa-mir-423-3p	MIMAT0001340	POTEM	641455	PAR-CLIP	26701625|27292025	Unspecified
	hsa-mir-550a-3p	MIMAT0003257	ARSD	414	HITS-CLIP	27418678	Unspecified
	hsa-mir-550a-3p	MIMAT0003257	TMEM50B	757	PAR-CLIP	23592263	Unspecified
	hsa-mir-550a-3p	MIMAT0003257	GTF2E1	2960	PAR-CLIP	20371350	Unspecified
	hsa-mir-550a-3p	MIMAT0003257	HSP90AA1	3320	PAR-CLIP	21572407	Unspecified
	hsa-mir-550a-3p	MIMAT0003257	CXCL10	3627	PAR-CLIP	21572407	Unspecified
	hsa-mir-550a-3p	MIMAT0003257	MDM2	4193	PAR-CLIP	20371350	Unspecified
	hsa-mir-550a-3p	MIMAT0003257	MOG	4340	HITS-CLIP	27418678	Unspecified
	hsa-mir-550a-3p	MIMAT0003257	MTAP	4507	HITS-CLIP	23824327	Unspecified
	hsa-mir-550a-3p	MIMAT0003257	SLC11A2	4891	HITS-CLIP	23824327	Unspecified
	hsa-mir-550a-3p	MIMAT0003257	POLR2F	5435	PAR-CLIP	23446348|22012620|26701625	Unspecified
	hsa-mir-550a-3p	MIMAT0003257	PKIA	5569	PAR-CLIP	22012620|20371350	Unspecified
	hsa-mir-550a-3p	MIMAT0003257	MAPK1	5594	Immunohistochemistry//In situ hybridization//Luciferase reporter assay//qRT-PCR//Western blot	27462780	Unspecified
	hsa-mir-550a-3p	MIMAT0003257	MAPK3	5595	Immunohistochemistry//In situ hybridization//Luciferase reporter assay//qRT-PCR//Western blot	27462780	Unspecified
	hsa-mir-550a-3p	MIMAT0003257	PSMB9	5698	HITS-CLIP	27418678	Unspecified
	hsa-mir-550a-3p	MIMAT0003257	SC5D	6309	HITS-CLIP	23824327	Unspecified
	hsa-mir-550a-3p	MIMAT0003257	TPM3	7170	PAR-CLIP	26701625	Unspecified
	hsa-mir-550a-3p	MIMAT0003257	TRAF1	7185	HITS-CLIP	19536157	Unspecified
	hsa-mir-550a-3p	MIMAT0003257	YWHAE	7531	PAR-CLIP	23592263	Unspecified
	hsa-mir-550a-3p	MIMAT0003257	DNAJA3	9093	CLASH	23622248	Unspecified
	hsa-mir-550a-3p	MIMAT0003257	RBM8A	9939	HITS-CLIP	19536157	Unspecified
	hsa-mir-550a-3p	MIMAT0003257	ABCF2	10061	HITS-CLIP	19536157	Unspecified
	hsa-mir-550a-3p	MIMAT0003257	FEM1B	10116	PAR-CLIP	23446348	Unspecified
	hsa-mir-550a-3p	MIMAT0003257	ACTR1A	10121	HITS-CLIP	23824327|27418678	Unspecified
	hsa-mir-550a-3p	MIMAT0003257	CNIH1	10175	PAR-CLIP	21572407	Unspecified
	hsa-mir-550a-3p	MIMAT0003257	SYNCRIP	10492	PAR-CLIP	21572407	Unspecified
	hsa-mir-550a-3p	MIMAT0003257	KDELR2	11014	PAR-CLIP	21572407	Unspecified
	hsa-mir-550a-3p	MIMAT0003257	NUDT3	11165	PAR-CLIP	27292025	Unspecified
	hsa-mir-550a-3p	MIMAT0003257	PXMP4	11264	HITS-CLIP	23824327	Unspecified
	hsa-mir-550a-3p	MIMAT0003257	KCNE4	23704	HITS-CLIP//PAR-CLIP	23706177|27292025	Unspecified
	hsa-mir-550a-3p	MIMAT0003257	NAA20	51126	HITS-CLIP	27418678	Unspecified
	hsa-mir-550a-3p	MIMAT0003257	TUBD1	51174	HITS-CLIP	19536157	Unspecified
	hsa-mir-550a-3p	MIMAT0003257	POLR3K	51728	PAR-CLIP	21572407|27292025	Unspecified
	hsa-mir-550a-3p	MIMAT0003257	SLC35F6	54978	HITS-CLIP	23824327	Unspecified
	hsa-mir-550a-3p	MIMAT0003257	YOD1	55432	PAR-CLIP	21572407	Unspecified
	hsa-mir-550a-3p	MIMAT0003257	TXLNG	55787	CLASH	23622248	Unspecified
	hsa-mir-550a-3p	MIMAT0003257	ZYG11B	79699	PAR-CLIP	27292025	Unspecified
	hsa-mir-550a-3p	MIMAT0003257	ZNF703	80139	PAR-CLIP	20371350	Unspecified
	hsa-mir-550a-3p	MIMAT0003257	CMIP	80790	PAR-CLIP	21572407	Unspecified
	hsa-mir-550a-3p	MIMAT0003257	URM1	81605	HITS-CLIP	19536157	Unspecified
	hsa-mir-550a-3p	MIMAT0003257	ZC3H12C	85463	PAR-CLIP	22100165	Unspecified
	hsa-mir-550a-3p	MIMAT0003257	HPS4	89781	HITS-CLIP	23824327|23313552|19536157|27418678|28735896	Unspecified
	hsa-mir-550a-3p	MIMAT0003257	TM4SF19	116211	HITS-CLIP	19536157	Unspecified
	hsa-mir-550a-3p	MIMAT0003257	EFHB	151651	HITS-CLIP	19536157	Unspecified
	hsa-mir-550a-3p	MIMAT0003257	OR7D2	162998	HITS-CLIP	23313552	Unspecified
	hsa-mir-550a-3p	MIMAT0003257	EID2	163126	HITS-CLIP	23824327	Unspecified
	hsa-mir-550a-3p	MIMAT0003257	ZNF525	170958	PAR-CLIP	20371350	Unspecified
	hsa-mir-550a-3p	MIMAT0003257	C2orf72	257407	PAR-CLIP	23592263|23446348|22012620|20371350|26701625|27292025	Unspecified
	hsa-mir-550a-3p	MIMAT0003257	ZNF621	285268	HITS-CLIP	23824327	Unspecified
	hsa-mir-550a-3p	MIMAT0003257	YY2	404281	HITS-CLIP	23824327	Unspecified
	hsa-mir-101-5p	MIMAT0004513	ATM	472	Luciferase reporter assay//qRT-PCR	20617180	Unspecified
	hsa-mir-101-5p	MIMAT0004513	BLMH	642	PAR-CLIP	21572407	Unspecified
	hsa-mir-101-5p	MIMAT0004513	CREBL2	1389	HITS-CLIP	23824327	Unspecified
	hsa-mir-101-5p	MIMAT0004513	DUSP3	1845	PAR-CLIP	21572407	Unspecified
	hsa-mir-101-5p	MIMAT0004513	EZH2	2146	qRT-PCR//Western blot	28000868	Unspecified
	hsa-mir-101-5p	MIMAT0004513	FDX1	2230	PAR-CLIP	23592263|20371350|27292025	Unspecified
	hsa-mir-101-5p	MIMAT0004513	FOS	2353	Luciferase reporter assay//qRT-PCR//Western blot	27485165	Unspecified
	hsa-mir-101-5p	MIMAT0004513	STMN1	3925	Immunofluorescence//Luciferase reporter assay//qRT-PCR//Western blot	25607713	Unspecified
	hsa-mir-101-5p	MIMAT0004513	LIPA	3988	PAR-CLIP	27292025	Unspecified
	hsa-mir-101-5p	MIMAT0004513	MAT2A	4144	PAR-CLIP	21572407|20371350	Unspecified
	hsa-mir-101-5p	MIMAT0004513	PAWR	5074	PAR-CLIP	21572407	Unspecified
	hsa-mir-101-5p	MIMAT0004513	PAX9	5083	PAR-CLIP	21572407	Unspecified
	hsa-mir-101-5p	MIMAT0004513	CDK17	5128	PAR-CLIP	21572407	Unspecified
	hsa-mir-101-5p	MIMAT0004513	PMAIP1	5366	PAR-CLIP	23446348|22012620|21572407|20371350	Unspecified
	hsa-mir-101-5p	MIMAT0004513	PPA1	5464	PAR-CLIP	20371350	Unspecified
	hsa-mir-101-5p	MIMAT0004513	PPP2R5E	5529	PAR-CLIP	23592263	Unspecified
	hsa-mir-101-5p	MIMAT0004513	PRKDC	5591	Luciferase reporter assay//qRT-PCR	20617180	Unspecified
	hsa-mir-101-5p	MIMAT0004513	RAB1A	5861	Luciferase reporter assay//qRT-PCR//Western blot	25850725	Unspecified
	hsa-mir-101-5p	MIMAT0004513	RAC1	5879	Luciferase reporter assay//qRT-PCR//Western blot	26697839	Unspecified
	hsa-mir-101-5p	MIMAT0004513	SOX9	6662	Luciferase reporter assay//qRT-PCR//Western blot	27911279	Unspecified
	hsa-mir-101-5p	MIMAT0004513	STK4	6789	PAR-CLIP	26701625	Unspecified
	hsa-mir-101-5p	MIMAT0004513	TEAD1	7003	PAR-CLIP	20371350	Unspecified
	hsa-mir-101-5p	MIMAT0004513	TFAM	7019	HITS-CLIP//PAR-CLIP	23592263|23446348|20371350|21572407	Unspecified
	hsa-mir-101-5p	MIMAT0004513	TLR2	7097	ELISA//Luciferase reporter assay//qRT-PCR//Western blot	26022377	Unspecified
	hsa-mir-101-5p	MIMAT0004513	TXK	7294	HITS-CLIP	23313552	Unspecified
	hsa-mir-101-5p	MIMAT0004513	VEGFA	7422	Luciferase reporter assay//qRT-PCR//Western blot	26870229	Unspecified
	hsa-mir-101-5p	MIMAT0004513	PABPN1	8106	PAR-CLIP	23592263	Unspecified
	hsa-mir-101-5p	MIMAT0004513	TMSB10	9168	CLASH	23622248	Unspecified
	hsa-mir-101-5p	MIMAT0004513	AIMP1	9255	PAR-CLIP	21572407	Unspecified
	hsa-mir-101-5p	MIMAT0004513	COPB2	9276	HITS-CLIP	23313552	Unspecified
	hsa-mir-101-5p	MIMAT0004513	KIAA0040	9674	HITS-CLIP	23313552	Unspecified
	hsa-mir-101-5p	MIMAT0004513	2021-03-06	10299	HITS-CLIP//PAR-CLIP	23446348|21572407|20371350|23824327	Unspecified
	hsa-mir-101-5p	MIMAT0004513	ZBTB18	10472	PAR-CLIP	20371350	Unspecified
	hsa-mir-101-5p	MIMAT0004513	SYNCRIP	10492	PAR-CLIP	23592263|23446348|21572407|20371350	Unspecified
	hsa-mir-101-5p	MIMAT0004513	TXNIP	10628	PAR-CLIP	20371350	Unspecified
	hsa-mir-101-5p	MIMAT0004513	STK38	11329	HITS-CLIP	23313552	Unspecified
	hsa-mir-101-5p	MIMAT0004513	TNRC6B	23112	PAR-CLIP	23592263	Unspecified
	hsa-mir-101-5p	MIMAT0004513	WWTR1	25937	PAR-CLIP	21572407	Unspecified
	hsa-mir-101-5p	MIMAT0004513	ZNF451	26036	HITS-CLIP	23313552	Unspecified
	hsa-mir-101-5p	MIMAT0004513	MYCBP	26292	HITS-CLIP	23824327	Unspecified
	hsa-mir-101-5p	MIMAT0004513	AFF4	27125	HITS-CLIP	23824327	Unspecified
	hsa-mir-101-5p	MIMAT0004513	CMPK1	51727	PAR-CLIP	23446348	Unspecified
	hsa-mir-101-5p	MIMAT0004513	PXK	54899	PAR-CLIP	21572407	Unspecified
	hsa-mir-101-5p	MIMAT0004513	MTPAP	55149	PAR-CLIP	22100165	Unspecified
	hsa-mir-101-5p	MIMAT0004513	TMA16	55319	PAR-CLIP	21572407	Unspecified
	hsa-mir-101-5p	MIMAT0004513	BMP2K	55589	PAR-CLIP	20371350	Unspecified
	hsa-mir-101-5p	MIMAT0004513	PNRC2	55629	PAR-CLIP	21572407	Unspecified
	hsa-mir-101-5p	MIMAT0004513	RBM22	55696	PAR-CLIP	22012620	Unspecified
	hsa-mir-101-5p	MIMAT0004513	CCDC88A	55704	Luciferase reporter assay//qRT-PCR//Western blot	26743900	Unspecified
	hsa-mir-101-5p	MIMAT0004513	ACKR3	57007	Luciferase reporter assay//qRT-PCR//Western blot	27904690	Unspecified
	hsa-mir-101-5p	MIMAT0004513	GJD2	57369	HITS-CLIP	23824327	Unspecified
	hsa-mir-101-5p	MIMAT0004513	USP36	57602	PAR-CLIP	23592263	Unspecified
	hsa-mir-101-5p	MIMAT0004513	NMNAT1	64802	HITS-CLIP	23824327	Unspecified
	hsa-mir-101-5p	MIMAT0004513	EFHD2	79180	PAR-CLIP	20371350	Unspecified
	hsa-mir-101-5p	MIMAT0004513	GTDC1	79712	HITS-CLIP	19536157	Unspecified
	hsa-mir-101-5p	MIMAT0004513	PIP4K2C	79837	PAR-CLIP	21572407	Unspecified
	hsa-mir-101-5p	MIMAT0004513	NAA50	80218	PAR-CLIP	22012620|26701625	Unspecified
	hsa-mir-101-5p	MIMAT0004513	CLPB	81570	HITS-CLIP//PAR-CLIP	22012620|27418678	Unspecified
	hsa-mir-101-5p	MIMAT0004513	LCOR	84458	PAR-CLIP	21572407	Unspecified
	hsa-mir-101-5p	MIMAT0004513	PIP4P1	90809	PAR-CLIP	23446348|21572407|20371350	Unspecified
	hsa-mir-101-5p	MIMAT0004513	TMEM68	137695	PAR-CLIP	23592263|24398324	Unspecified
	hsa-mir-101-5p	MIMAT0004513	CCDC117	150275	PAR-CLIP	22012620	Unspecified
	hsa-mir-101-5p	MIMAT0004513	TMEM161B	153396	PAR-CLIP	21572407	Unspecified
	hsa-mir-101-5p	MIMAT0004513	ATXN7L1	222255	PAR-CLIP	22012620|21572407	Unspecified
	hsa-mir-101-5p	MIMAT0004513	RSPO1	284654	PAR-CLIP	26701625	Unspecified
	hsa-mir-101-5p	MIMAT0004513	C5orf51	285636	PAR-CLIP	23592263	Unspecified
	hsa-mir-101-5p	MIMAT0004513	GXYLT2	727936	PAR-CLIP	20371350	Unspecified
	hsa-mir-101-5p	MIMAT0004513	BCL2L2-PABPN1	100529063	PAR-CLIP	23592263	Unspecified
	hsa-mir-200c-5p	MIMAT0004657	ARSD	414	HITS-CLIP	27418678	Unspecified
	hsa-mir-200c-5p	MIMAT0004657	BMI1	648	Luciferase reporter assay//qRT-PCR//Western blot	28413473|25367080	Unspecified
	hsa-mir-200c-5p	MIMAT0004657	TMEM50B	757	PAR-CLIP	23592263	Unspecified
	hsa-mir-200c-5p	MIMAT0004657	CDH1	999	Western blot	28411308	Unspecified
	hsa-mir-200c-5p	MIMAT0004657	CYP1B1	1545	Immunohistochemistry//Luciferase reporter assay//qRT-PCR//Western blot	25860934	Unspecified
	hsa-mir-200c-5p	MIMAT0004657	E2F3	1871	Luciferase reporter assay//qRT-PCR//Western blot	28413473|25367080	Unspecified
	hsa-mir-200c-5p	MIMAT0004657	GTF2E1	2960	PAR-CLIP	20371350	Unspecified
	hsa-mir-200c-5p	MIMAT0004657	HIF1A	3091	Flow//Immunocytochemistry//Next Generation Sequencing (NGS)//qRT-PCR	26815014	Unspecified
	hsa-mir-200c-5p	MIMAT0004657	HSP90AA1	3320	PAR-CLIP	21572407	Unspecified
	hsa-mir-200c-5p	MIMAT0004657	CXCL10	3627	PAR-CLIP	21572407	Unspecified
	hsa-mir-200c-5p	MIMAT0004657	MDM2	4193	PAR-CLIP	20371350	Unspecified
	hsa-mir-200c-5p	MIMAT0004657	MOG	4340	HITS-CLIP	27418678	Unspecified
	hsa-mir-200c-5p	MIMAT0004657	MTAP	4507	HITS-CLIP	23824327	Unspecified
	hsa-mir-200c-5p	MIMAT0004657	SLC11A2	4891	HITS-CLIP	23824327	Unspecified
	hsa-mir-200c-5p	MIMAT0004657	POLR2F	5435	PAR-CLIP	23446348|22012620|26701625	Unspecified
	hsa-mir-200c-5p	MIMAT0004657	PKIA	5569	PAR-CLIP	22012620|20371350	Unspecified
	hsa-mir-200c-5p	MIMAT0004657	PSMB9	5698	HITS-CLIP	27418678	Unspecified
	hsa-mir-200c-5p	MIMAT0004657	PTEN	5728	Western blot	28411308	Unspecified
	hsa-mir-200c-5p	MIMAT0004657	SC5D	6309	HITS-CLIP	23824327	Unspecified
	hsa-mir-200c-5p	MIMAT0004657	TPM3	7170	PAR-CLIP	26701625	Unspecified
	hsa-mir-200c-5p	MIMAT0004657	TRAF1	7185	HITS-CLIP	19536157	Unspecified
	hsa-mir-200c-5p	MIMAT0004657	YWHAE	7531	PAR-CLIP	23592263	Unspecified
	hsa-mir-200c-5p	MIMAT0004657	RBM8A	9939	HITS-CLIP	19536157	Unspecified
	hsa-mir-200c-5p	MIMAT0004657	ABCF2	10061	HITS-CLIP	19536157	Unspecified
	hsa-mir-200c-5p	MIMAT0004657	FEM1B	10116	PAR-CLIP	23446348	Unspecified
	hsa-mir-200c-5p	MIMAT0004657	ACTR1A	10121	HITS-CLIP	23824327|27418678	Unspecified
	hsa-mir-200c-5p	MIMAT0004657	CNIH1	10175	PAR-CLIP	21572407	Unspecified
	hsa-mir-200c-5p	MIMAT0004657	SYNCRIP	10492	PAR-CLIP	21572407	Unspecified
	hsa-mir-200c-5p	MIMAT0004657	KDELR2	11014	PAR-CLIP	21572407	Unspecified
	hsa-mir-200c-5p	MIMAT0004657	NUDT3	11165	PAR-CLIP	27292025	Unspecified
	hsa-mir-200c-5p	MIMAT0004657	PXMP4	11264	HITS-CLIP	23824327	Unspecified
	hsa-mir-200c-5p	MIMAT0004657	KCNE4	23704	HITS-CLIP//PAR-CLIP	23706177|27292025	Unspecified
	hsa-mir-200c-5p	MIMAT0004657	NAA20	51126	HITS-CLIP	27418678	Unspecified
	hsa-mir-200c-5p	MIMAT0004657	TUBD1	51174	HITS-CLIP	19536157	Unspecified
	hsa-mir-200c-5p	MIMAT0004657	POLR3K	51728	PAR-CLIP	21572407|27292025	Unspecified
	hsa-mir-200c-5p	MIMAT0004657	SLC35F6	54978	HITS-CLIP	23824327	Unspecified
	hsa-mir-200c-5p	MIMAT0004657	YOD1	55432	PAR-CLIP	21572407	Unspecified
	hsa-mir-200c-5p	MIMAT0004657	ZYG11B	79699	PAR-CLIP	27292025	Unspecified
	hsa-mir-200c-5p	MIMAT0004657	ZNF703	80139	PAR-CLIP	20371350	Unspecified
	hsa-mir-200c-5p	MIMAT0004657	CMIP	80790	PAR-CLIP	21572407	Unspecified
	hsa-mir-200c-5p	MIMAT0004657	ZC3H12C	85463	PAR-CLIP	22100165	Unspecified
	hsa-mir-200c-5p	MIMAT0004657	HPS4	89781	HITS-CLIP	23824327|23313552|19536157|27418678|28735896	Unspecified
	hsa-mir-200c-5p	MIMAT0004657	TM4SF19	116211	HITS-CLIP	19536157	Unspecified
	hsa-mir-200c-5p	MIMAT0004657	EFHB	151651	HITS-CLIP	19536157	Unspecified
	hsa-mir-200c-5p	MIMAT0004657	OR7D2	162998	HITS-CLIP	23313552	Unspecified
	hsa-mir-200c-5p	MIMAT0004657	EID2	163126	HITS-CLIP	23824327	Unspecified
	hsa-mir-200c-5p	MIMAT0004657	ZNF525	170958	PAR-CLIP	20371350	Unspecified
	hsa-mir-200c-5p	MIMAT0004657	C2orf72	257407	PAR-CLIP	23592263|23446348|22012620|20371350|26701625|27292025	Unspecified
	hsa-mir-200c-5p	MIMAT0004657	ZNF621	285268	HITS-CLIP	23824327	Unspecified
	hsa-mir-200c-5p	MIMAT0004657	YY2	404281	HITS-CLIP	23824327	Unspecified
	hsa-mir-582-3p	MIMAT0004797	ALDH9A1	223	HITS-CLIP//PAR-CLIP	23592263|24398324|23446348|21572407|20371350|27418678	Unspecified
	hsa-mir-582-3p	MIMAT0004797	AMD 1.00	262	PAR-CLIP	27292025	Unspecified
	hsa-mir-582-3p	MIMAT0004797	ARF3	377	PAR-CLIP	23592263	Unspecified
	hsa-mir-582-3p	MIMAT0004797	CEACAM5	1048	HITS-CLIP	23824327	Unspecified
	hsa-mir-582-3p	MIMAT0004797	EIF4EBP2	1979	PAR-CLIP	27292025	Unspecified
	hsa-mir-582-3p	MIMAT0004797	FER	2241	HITS-CLIP	23824327	Unspecified
	hsa-mir-582-3p	MIMAT0004797	B4GALT1	2683	PAR-CLIP	23592263	Unspecified
	hsa-mir-582-3p	MIMAT0004797	GRM5	2915	PAR-CLIP	23446348	Unspecified
	hsa-mir-582-3p	MIMAT0004797	GRM6	2916	HITS-CLIP//PAR-CLIP	23824327|27292025	Unspecified
	hsa-mir-582-3p	MIMAT0004797	KCNC1	3746	qRT-PCR	23295946	Unspecified
	hsa-mir-582-3p	MIMAT0004797	MPP2	4355	PAR-CLIP	26701625	Unspecified
	hsa-mir-582-3p	MIMAT0004797	MYO1C	4641	PAR-CLIP	23592263|20371350|26701625	Unspecified
	hsa-mir-582-3p	MIMAT0004797	PGGT1B	5229	qRT-PCR	23295946	Unspecified
	hsa-mir-582-3p	MIMAT0004797	RAB27A	5873	qRT-PCR	23295946	Unspecified
	hsa-mir-582-3p	MIMAT0004797	RREB1	6239	PAR-CLIP	23592263|20371350	Unspecified
	hsa-mir-582-3p	MIMAT0004797	SCN4B	6330	PAR-CLIP	26701625	Unspecified
	hsa-mir-582-3p	MIMAT0004797	SFRP1	6422	Luciferase reporter assay//qRT-PCR//RNA immunopercipitation//TOP/FOP luciferase assay//Western blot	26468775	Unspecified
	hsa-mir-582-3p	MIMAT0004797	SSX5	6758	HITS-CLIP	23824327	Unspecified
	hsa-mir-582-3p	MIMAT0004797	SURF4	6836	PAR-CLIP	20371350	Unspecified
	hsa-mir-582-3p	MIMAT0004797	GAN	8139	HITS-CLIP	23824327	Unspecified
	hsa-mir-582-3p	MIMAT0004797	ESS2	8220	PAR-CLIP	26701625	Unspecified
	hsa-mir-582-3p	MIMAT0004797	AXIN2	8313	Luciferase reporter assay//qRT-PCR//RNA immunopercipitation//TOP/FOP luciferase assay//Western blot	26468775	Unspecified
	hsa-mir-582-3p	MIMAT0004797	STC2	8614	PAR-CLIP	22012620	Unspecified
	hsa-mir-582-3p	MIMAT0004797	CPNE3	8895	PAR-CLIP	23592263	Unspecified
	hsa-mir-582-3p	MIMAT0004797	RTL8C	8933	PAR-CLIP	27292025	Unspecified
	hsa-mir-582-3p	MIMAT0004797	NFS1	9054	PAR-CLIP	26701625	Unspecified
	hsa-mir-582-3p	MIMAT0004797	ENTPD4	9583	PAR-CLIP	20371350	Unspecified
	hsa-mir-582-3p	MIMAT0004797	CCS	9973	HITS-CLIP//PAR-CLIP	23824327|27292025	Unspecified
	hsa-mir-582-3p	MIMAT0004797	TNIP1	10318	HITS-CLIP//PAR-CLIP	23446348|21572407	Unspecified
	hsa-mir-582-3p	MIMAT0004797	KRR1	11103	HITS-CLIP	23313552	Unspecified
	hsa-mir-582-3p	MIMAT0004797	MED13L	23389	HITS-CLIP	23824327	Unspecified
	hsa-mir-582-3p	MIMAT0004797	DKK 3.00	27122	Luciferase reporter assay//qRT-PCR//RNA immunopercipitation//TOP/FOP luciferase assay//Western blot	26468775	Unspecified
	hsa-mir-582-3p	MIMAT0004797	SLC25A37	51312	HITS-CLIP	23824327	Unspecified
	hsa-mir-582-3p	MIMAT0004797	GNL3L	54552	HITS-CLIP	23824327	Unspecified
	hsa-mir-582-3p	MIMAT0004797	WBP1L	54838	PAR-CLIP	22100165	Unspecified
	hsa-mir-582-3p	MIMAT0004797	INO80D	54891	PAR-CLIP	22291592	Unspecified
	hsa-mir-582-3p	MIMAT0004797	PTCD3	55037	HITS-CLIP	27418678	Unspecified
	hsa-mir-582-3p	MIMAT0004797	RBM28	55131	HITS-CLIP	23824327	Unspecified
	hsa-mir-582-3p	MIMAT0004797	NCLN	56926	PAR-CLIP	26701625|27292025	Unspecified
	hsa-mir-582-3p	MIMAT0004797	FAM160B1	57700	PAR-CLIP	21572407	Unspecified
	hsa-mir-582-3p	MIMAT0004797	ARHGEF39	84904	HITS-CLIP	23824327	Unspecified
	hsa-mir-582-3p	MIMAT0004797	PRPF38A	84950	HITS-CLIP//PAR-CLIP	23824327|27292025	Unspecified
	hsa-mir-582-3p	MIMAT0004797	DIXDC1	85458	qRT-PCR	23295946	Unspecified
	hsa-mir-582-3p	MIMAT0004797	SELENOI	85465	HITS-CLIP	23313552	Unspecified
	hsa-mir-582-3p	MIMAT0004797	LENG9	94059	HITS-CLIP	23824327	Unspecified
	hsa-mir-582-3p	MIMAT0004797	MYL12B	103910	PAR-CLIP	20371350	Unspecified
	hsa-mir-582-3p	MIMAT0004797	LRRK2	120892	qRT-PCR	23295946	Unspecified
	hsa-mir-582-3p	MIMAT0004797	FSD2	123722	HITS-CLIP	27418678	Unspecified
	hsa-mir-582-3p	MIMAT0004797	GRPEL2	134266	PAR-CLIP	20371350	Unspecified
	hsa-mir-582-3p	MIMAT0004797	DUSP18	150290	PAR-CLIP	27292025	Unspecified
	hsa-mir-582-3p	MIMAT0004797	SLC16A9	220963	PAR-CLIP	21572407	Unspecified
	hsa-mir-582-3p	MIMAT0004797	C10orf67	256815	PAR-CLIP	21572407	Unspecified
	hsa-mir-582-3p	MIMAT0004797	ARL 10.00	285598	PAR-CLIP	23592263|23446348|22012620|21572407|20371350|26701625|27292025	Unspecified
	hsa-mir-582-3p	MIMAT0004797	ZNF716	441234	HITS-CLIP	23824327	Unspecified
	hsa-mir-582-3p	MIMAT0004797	SMIM15	643155	HITS-CLIP	23824327	Unspecified
	hsa-mir-942-5p	MIMAT0004985	ACVRL1	94	HITS-CLIP	19536157	Unspecified
	hsa-mir-942-5p	MIMAT0004985	ADD1	118	HITS-CLIP	23824327	Unspecified
	hsa-mir-942-5p	MIMAT0004985	ADPRH	141	HITS-CLIP	23824327	Unspecified
	hsa-mir-942-5p	MIMAT0004985	ALDOA	226	HITS-CLIP	19536157	Unspecified
	hsa-mir-942-5p	MIMAT0004985	ANK1	286	HITS-CLIP	19536157	Unspecified
	hsa-mir-942-5p	MIMAT0004985	ASCL1	429	HITS-CLIP	23824327	Unspecified
	hsa-mir-942-5p	MIMAT0004985	ATIC	471	PAR-CLIP	22100165	Unspecified
	hsa-mir-942-5p	MIMAT0004985	ATP1A3	478	HITS-CLIP	23824327	Unspecified
	hsa-mir-942-5p	MIMAT0004985	CBLB	868	HITS-CLIP	19536157	Unspecified
	hsa-mir-942-5p	MIMAT0004985	CDK6	1021	PAR-CLIP	21572407|20371350	Unspecified
	hsa-mir-942-5p	MIMAT0004985	CDKN1A	1026	Luciferase reporter assay//qRT-PCR//Western blot	20190813	Unspecified
	hsa-mir-942-5p	MIMAT0004985	CMKLR1	1240	HITS-CLIP	19536157	Unspecified
	hsa-mir-942-5p	MIMAT0004985	CREBBP	1387	PAR-CLIP	24398324	Unspecified
	hsa-mir-942-5p	MIMAT0004985	CSNK1A1	1452	HITS-CLIP	19536157	Unspecified
	hsa-mir-942-5p	MIMAT0004985	CYLD	1540	HITS-CLIP	23824327	Unspecified
	hsa-mir-942-5p	MIMAT0004985	CD55	1604	HITS-CLIP	23824327	Unspecified
	hsa-mir-942-5p	MIMAT0004985	DR1	1810	HITS-CLIP	23824327	Unspecified
	hsa-mir-942-5p	MIMAT0004985	DTX1	1840	HITS-CLIP	19536157	Unspecified
	hsa-mir-942-5p	MIMAT0004985	EDN2	1907	HITS-CLIP	19536157	Unspecified
	hsa-mir-942-5p	MIMAT0004985	ELAVL3	1995	HITS-CLIP	23824327	Unspecified
	hsa-mir-942-5p	MIMAT0004985	EMX2	2018	HITS-CLIP	23824327	Unspecified
	hsa-mir-942-5p	MIMAT0004985	EPHX2	2053	HITS-CLIP	23824327	Unspecified
	hsa-mir-942-5p	MIMAT0004985	F2RL1	2150	HITS-CLIP	19536157	Unspecified
	hsa-mir-942-5p	MIMAT0004985	FASN	2194	CLASH	23622248	Unspecified
	hsa-mir-942-5p	MIMAT0004985	FCGR3B	2215	PAR-CLIP	22012620	Unspecified
	hsa-mir-942-5p	MIMAT0004985	FGF9	2254	HITS-CLIP	23824327	Unspecified
	hsa-mir-942-5p	MIMAT0004985	GPC5	2262	HITS-CLIP	23824327	Unspecified
	hsa-mir-942-5p	MIMAT0004985	FOXO1	2308	HITS-CLIP	23824327	Unspecified
	hsa-mir-942-5p	MIMAT0004985	GFRA1	2674	HITS-CLIP	23824327	Unspecified
	hsa-mir-942-5p	MIMAT0004985	GJB1	2705	HITS-CLIP	19536157	Unspecified
	hsa-mir-942-5p	MIMAT0004985	RAPGEF1	2889	HITS-CLIP	23824327	Unspecified
	hsa-mir-942-5p	MIMAT0004985	GSK3B	2932	Luciferase reporter assay//Western blot	25844602	Unspecified
	hsa-mir-942-5p	MIMAT0004985	HNRNPA1	3178	HITS-CLIP	23313552	Unspecified
	hsa-mir-942-5p	MIMAT0004985	HOXB5	3215	HITS-CLIP	23824327	Unspecified
	hsa-mir-942-5p	MIMAT0004985	HSPA4	3308	CLASH	23622248	Unspecified
	hsa-mir-942-5p	MIMAT0004985	IFI27	3429	Flow//Immunofluorescence//Luciferase reporter assay//qRT-PCR//Western blot	24970806|24727952	Unspecified
	hsa-mir-942-5p	MIMAT0004985	TNPO1	3842	HITS-CLIP	19536157	Unspecified
	hsa-mir-942-5p	MIMAT0004985	LPP	4026	HITS-CLIP	23824327	Unspecified
	hsa-mir-942-5p	MIMAT0004985	LSAMP	4045	PAR-CLIP	22012620	Unspecified
	hsa-mir-942-5p	MIMAT0004985	LTF	4057	HITS-CLIP	23824327	Unspecified
	hsa-mir-942-5p	MIMAT0004985	CAPRIN1	4076	HITS-CLIP	23824327	Unspecified
	hsa-mir-942-5p	MIMAT0004985	MDM4	4194	PAR-CLIP	27292025	Unspecified
	hsa-mir-942-5p	MIMAT0004985	MECP2	4204	HITS-CLIP	23824327	Unspecified
	hsa-mir-942-5p	MIMAT0004985	CD200	4345	HITS-CLIP	23824327	Unspecified
	hsa-mir-942-5p	MIMAT0004985	NCK1	4690	HITS-CLIP	23824327	Unspecified
	hsa-mir-942-5p	MIMAT0004985	NFKBIA	4792	Luciferase reporter assay//Microarray//Western blot	27440900	Unspecified
	hsa-mir-942-5p	MIMAT0004985	PDE3A	5139	HITS-CLIP	23824327	Unspecified
	hsa-mir-942-5p	MIMAT0004985	POU2F1	5451	HITS-CLIP	23824327|19536157	Unspecified
	hsa-mir-942-5p	MIMAT0004985	PRKD1	5587	PAR-CLIP	20371350	Unspecified
	hsa-mir-942-5p	MIMAT0004985	PTPN11	5781	HITS-CLIP	19536157	Unspecified
	hsa-mir-942-5p	MIMAT0004985	RAP2B	5912	HITS-CLIP	23824327	Unspecified
	hsa-mir-942-5p	MIMAT0004985	TRIM27	5987	HITS-CLIP	19536157	Unspecified
	hsa-mir-942-5p	MIMAT0004985	RORA	6095	HITS-CLIP	23824327	Unspecified
	hsa-mir-942-5p	MIMAT0004985	RREB1	6239	PAR-CLIP	22291592	Unspecified
	hsa-mir-942-5p	MIMAT0004985	ATXN1	6310	HITS-CLIP	23824327	Unspecified
	hsa-mir-942-5p	MIMAT0004985	CCL16	6360	HITS-CLIP	23824327	Unspecified
	hsa-mir-942-5p	MIMAT0004985	CXCL5	6374	PAR-CLIP	26701625	Unspecified
	hsa-mir-942-5p	MIMAT0004985	SFRP4	6424	Luciferase reporter assay//Western blot	25844602	Unspecified
	hsa-mir-942-5p	MIMAT0004985	SORD	6652	HITS-CLIP	23824327	Unspecified
	hsa-mir-942-5p	MIMAT0004985	SPIB	6689	HITS-CLIP	23824327	Unspecified
	hsa-mir-942-5p	MIMAT0004985	SRM	6723	HITS-CLIP	23824327	Unspecified
	hsa-mir-942-5p	MIMAT0004985	SURF4	6836	HITS-CLIP	19536157	Unspecified
	hsa-mir-942-5p	MIMAT0004985	TADA2A	6871	HITS-CLIP	23824327	Unspecified
	hsa-mir-942-5p	MIMAT0004985	TLE1	7088	Luciferase reporter assay//Western blot	25844602	Unspecified
	hsa-mir-942-5p	MIMAT0004985	TLR4	7099	HITS-CLIP	19536157	Unspecified
	hsa-mir-942-5p	MIMAT0004985	TNS1	7145	HITS-CLIP	23824327|19536157	Unspecified
	hsa-mir-942-5p	MIMAT0004985	UBE2D3	7323	PAR-CLIP	26701625	Unspecified
	hsa-mir-942-5p	MIMAT0004985	UQCRB	7381	HITS-CLIP	23824327	Unspecified
	hsa-mir-942-5p	MIMAT0004985	VDR	7421	HITS-CLIP	19536157	Unspecified
	hsa-mir-942-5p	MIMAT0004985	ZFX	7543	HITS-CLIP	23824327	Unspecified
	hsa-mir-942-5p	MIMAT0004985	ZNF22	7570	HITS-CLIP	23824327	Unspecified
	hsa-mir-942-5p	MIMAT0004985	ZNF208	7757	HITS-CLIP	23313552	Unspecified
	hsa-mir-942-5p	MIMAT0004985	DPF3	8110	HITS-CLIP	23824327	Unspecified
	hsa-mir-942-5p	MIMAT0004985	C21orf33	8209	HITS-CLIP	23824327	Unspecified
	hsa-mir-942-5p	MIMAT0004985	SPOP	8405	HITS-CLIP	23824327	Unspecified
	hsa-mir-942-5p	MIMAT0004985	B3GALNT1	8706	HITS-CLIP	19536157	Unspecified
	hsa-mir-942-5p	MIMAT0004985	RNF8	9025	HITS-CLIP	19536157	Unspecified
	hsa-mir-942-5p	MIMAT0004985	FRMPD4	9758	HITS-CLIP	23824327	Unspecified
	hsa-mir-942-5p	MIMAT0004985	RASSF2	9770	HITS-CLIP	19536157	Unspecified
	hsa-mir-942-5p	MIMAT0004985	PTDSS1	9791	HITS-CLIP	23824327	Unspecified
	hsa-mir-942-5p	MIMAT0004985	TECPR2	9895	HITS-CLIP	23824327	Unspecified
	hsa-mir-942-5p	MIMAT0004985	G3BP2	9908	HITS-CLIP	23824327	Unspecified
	hsa-mir-942-5p	MIMAT0004985	TRIB1	10221	HITS-CLIP	23824327|19536157	Unspecified
	hsa-mir-942-5p	MIMAT0004985	COQ7	10229	HITS-CLIP	23824327	Unspecified
	hsa-mir-942-5p	MIMAT0004985	KLF2	10365	HITS-CLIP	23824327|19536157	Unspecified
	hsa-mir-942-5p	MIMAT0004985	NEBL	10529	HITS-CLIP	23824327	Unspecified
	hsa-mir-942-5p	MIMAT0004985	POLD3	10714	HITS-CLIP	23824327	Unspecified
	hsa-mir-942-5p	MIMAT0004985	NCKAP1	10787	HITS-CLIP	28735896	Unspecified
	hsa-mir-942-5p	MIMAT0004985	WASF3	10810	HITS-CLIP	23824327	Unspecified
	hsa-mir-942-5p	MIMAT0004985	ESM1	11082	HITS-CLIP	19536157	Unspecified
	hsa-mir-942-5p	MIMAT0004985	HIBADH	11112	HITS-CLIP	23824327	Unspecified
	hsa-mir-942-5p	MIMAT0004985	PTGDR2	11251	HITS-CLIP	23824327	Unspecified
	hsa-mir-942-5p	MIMAT0004985	IKZF2	22807	PAR-CLIP	22012620	Unspecified
	hsa-mir-942-5p	MIMAT0004985	PPP6R1	22870	PAR-CLIP	23592263|27292025	Unspecified
	hsa-mir-942-5p	MIMAT0004985	ERP44	23071	HITS-CLIP	19536157	Unspecified
	hsa-mir-942-5p	MIMAT0004985	ANKRD28	23243	HITS-CLIP	23824327	Unspecified
	hsa-mir-942-5p	MIMAT0004985	EXOC7	23265	HITS-CLIP	23824327	Unspecified
	hsa-mir-942-5p	MIMAT0004985	MGRN1	23295	HITS-CLIP	23824327	Unspecified
	hsa-mir-942-5p	MIMAT0004985	ACSL6	23305	PAR-CLIP	23446348	Unspecified
	hsa-mir-942-5p	MIMAT0004985	DPY19L1	23333	HITS-CLIP	23824327	Unspecified
	hsa-mir-942-5p	MIMAT0004985	PHF3	23469	HITS-CLIP	23824327	Unspecified
	hsa-mir-942-5p	MIMAT0004985	POFUT1	23509	PAR-CLIP	22100165	Unspecified
	hsa-mir-942-5p	MIMAT0004985	SUZ12	23512	PAR-CLIP	22012620	Unspecified
	hsa-mir-942-5p	MIMAT0004985	PATZ1	23598	PAR-CLIP	22012620	Unspecified
	hsa-mir-942-5p	MIMAT0004985	POLA2	23649	HITS-CLIP	23824327	Unspecified
	hsa-mir-942-5p	MIMAT0004985	TMEM2	23670	HITS-CLIP	23824327	Unspecified
	hsa-mir-942-5p	MIMAT0004985	SPATS2L	26010	HITS-CLIP	23824327	Unspecified
	hsa-mir-942-5p	MIMAT0004985	GAPVD1	26130	HITS-CLIP	23824327	Unspecified
	hsa-mir-942-5p	MIMAT0004985	FBXO2	26232	HITS-CLIP	23824327	Unspecified
	hsa-mir-942-5p	MIMAT0004985	AGO1	26523	HITS-CLIP//PAR-CLIP	22100165|19536157	Unspecified
	hsa-mir-942-5p	MIMAT0004985	RGS17	26575	HITS-CLIP	23824327	Unspecified
	hsa-mir-942-5p	MIMAT0004985	DKK 3.00	27122	HITS-CLIP//PAR-CLIP	20371350|19536157	Unspecified
	hsa-mir-942-5p	MIMAT0004985	PCDH17	27253	HITS-CLIP	19536157	Unspecified
	hsa-mir-942-5p	MIMAT0004985	ZNF638	27332	HITS-CLIP	23824327	Unspecified
	hsa-mir-942-5p	MIMAT0004985	TRIB2	28951	HITS-CLIP	23824327	Unspecified
	hsa-mir-942-5p	MIMAT0004985	OSTM1	28962	HITS-CLIP	19536157	Unspecified
	hsa-mir-942-5p	MIMAT0004985	CDON	50937	HITS-CLIP	23824327	Unspecified
	hsa-mir-942-5p	MIMAT0004985	RWDD1	51389	HITS-CLIP	23824327	Unspecified
	hsa-mir-942-5p	MIMAT0004985	TRIM33	51592	HITS-CLIP	23824327	Unspecified
	hsa-mir-942-5p	MIMAT0004985	EMCN	51705	HITS-CLIP	19536157	Unspecified
	hsa-mir-942-5p	MIMAT0004985	GNG2	54331	HITS-CLIP	19536157	Unspecified
	hsa-mir-942-5p	MIMAT0004985	RBM27	54439	HITS-CLIP	23824327	Unspecified
	hsa-mir-942-5p	MIMAT0004985	GTPBP2	54676	CLASH	23622248	Unspecified
	hsa-mir-942-5p	MIMAT0004985	BNC2	54796	HITS-CLIP	23824327	Unspecified
	hsa-mir-942-5p	MIMAT0004985	GIN1	54826	HITS-CLIP	23824327	Unspecified
	hsa-mir-942-5p	MIMAT0004985	SNRK	54861	PAR-CLIP	22012620	Unspecified
	hsa-mir-942-5p	MIMAT0004985	RALGPS2	55103	HITS-CLIP	23824327	Unspecified
	hsa-mir-942-5p	MIMAT0004985	LINS1	55180	HITS-CLIP	23824327	Unspecified
	hsa-mir-942-5p	MIMAT0004985	TMLHE	55217	HITS-CLIP	23824327	Unspecified
	hsa-mir-942-5p	MIMAT0004985	DNAH3	55567	HITS-CLIP	19536157	Unspecified
	hsa-mir-942-5p	MIMAT0004985	MTFR1L	56181	HITS-CLIP	23824327	Unspecified
	hsa-mir-942-5p	MIMAT0004985	ENTPD7	57089	HITS-CLIP	19536157	Unspecified
	hsa-mir-942-5p	MIMAT0004985	ARFGEF3	57221	HITS-CLIP	23824327	Unspecified
	hsa-mir-942-5p	MIMAT0004985	RAB22A	57403	HITS-CLIP//PAR-CLIP	20371350|23313552	Unspecified
	hsa-mir-942-5p	MIMAT0004985	NLGN4X	57502	HITS-CLIP	23824327	Unspecified
	hsa-mir-942-5p	MIMAT0004985	ZSWIM5	57643	HITS-CLIP	28735896	Unspecified
	hsa-mir-942-5p	MIMAT0004985	PLEKHA2	59339	HITS-CLIP	23824327	Unspecified
	hsa-mir-942-5p	MIMAT0004985	SH2D4A	63898	HITS-CLIP	23824327	Unspecified
	hsa-mir-942-5p	MIMAT0004985	BLOC1S5	63915	HITS-CLIP	23824327|19536157	Unspecified
	hsa-mir-942-5p	MIMAT0004985	2021-03-01	64757	HITS-CLIP//PAR-CLIP	22012620|19536157	Unspecified
	hsa-mir-942-5p	MIMAT0004985	SOWAHC	65124	HITS-CLIP	23824327	Unspecified
	hsa-mir-942-5p	MIMAT0004985	ZNF747	65988	PAR-CLIP	26701625|27292025	Unspecified
	hsa-mir-942-5p	MIMAT0004985	PRRG4	79056	HITS-CLIP	23824327	Unspecified
	hsa-mir-942-5p	MIMAT0004985	ZNF343	79175	HITS-CLIP	19536157	Unspecified
	hsa-mir-942-5p	MIMAT0004985	LRRC2	79442	HITS-CLIP	19536157	Unspecified
	hsa-mir-942-5p	MIMAT0004985	ADIPOR2	79602	PAR-CLIP	21572407	Unspecified
	hsa-mir-942-5p	MIMAT0004985	C22orf46	79640	HITS-CLIP	19536157	Unspecified
	hsa-mir-942-5p	MIMAT0004985	NOL9	79707	HITS-CLIP	23824327|19536157	Unspecified
	hsa-mir-942-5p	MIMAT0004985	TBL1XR1	79718	PAR-CLIP	22012620	Unspecified
	hsa-mir-942-5p	MIMAT0004985	C1orf115	79762	HITS-CLIP	23824327|19536157	Unspecified
	hsa-mir-942-5p	MIMAT0004985	RPAP2	79871	HITS-CLIP	23824327	Unspecified
	hsa-mir-942-5p	MIMAT0004985	L2HGDH	79944	HITS-CLIP	23824327	Unspecified
	hsa-mir-942-5p	MIMAT0004985	CSRNP3	80034	HITS-CLIP	19536157	Unspecified
	hsa-mir-942-5p	MIMAT0004985	BICC1	80114	HITS-CLIP	23824327	Unspecified
	hsa-mir-942-5p	MIMAT0004985	SETD7	80854	HITS-CLIP	19536157	Unspecified
	hsa-mir-942-5p	MIMAT0004985	RPF2	84154	PAR-CLIP	21572407|20371350	Unspecified
	hsa-mir-942-5p	MIMAT0004985	TRAF7	84231	PAR-CLIP	26701625	Unspecified
	hsa-mir-942-5p	MIMAT0004985	FAXC	84553	HITS-CLIP	23824327	Unspecified
	hsa-mir-942-5p	MIMAT0004985	FBXL20	84961	HITS-CLIP	19536157	Unspecified
	hsa-mir-942-5p	MIMAT0004985	PPP1R3E	90673	HITS-CLIP	19536157	Unspecified
	hsa-mir-942-5p	MIMAT0004985	NEK9	91754	HITS-CLIP	23824327	Unspecified
	hsa-mir-942-5p	MIMAT0004985	ATP6AP1L	92270	HITS-CLIP	23824327	Unspecified
	hsa-mir-942-5p	MIMAT0004985	CAPN13	92291	HITS-CLIP	23824327	Unspecified
	hsa-mir-942-5p	MIMAT0004985	SP140L	93349	HITS-CLIP	23824327	Unspecified
	hsa-mir-942-5p	MIMAT0004985	FAM83F	113828	HITS-CLIP	23824327	Unspecified
	hsa-mir-942-5p	MIMAT0004985	GALNT13	114805	HITS-CLIP	23824327	Unspecified
	hsa-mir-942-5p	MIMAT0004985	GPR146	115330	HITS-CLIP	19536157	Unspecified
	hsa-mir-942-5p	MIMAT0004985	GBP4	115361	HITS-CLIP	19536157	Unspecified
	hsa-mir-942-5p	MIMAT0004985	TNFRSF13C	115650	HITS-CLIP	23824327	Unspecified
	hsa-mir-942-5p	MIMAT0004985	CLNK	116449	HITS-CLIP	23824327	Unspecified
	hsa-mir-942-5p	MIMAT0004985	GJD3	125111	HITS-CLIP	23824327	Unspecified
	hsa-mir-942-5p	MIMAT0004985	LRRC38	126755	PAR-CLIP	22012620	Unspecified
	hsa-mir-942-5p	MIMAT0004985	TSHZ2	128553	HITS-CLIP	23824327|19536157	Unspecified
	hsa-mir-942-5p	MIMAT0004985	TMPRSS11B	132724	HITS-CLIP	19536157	Unspecified
	hsa-mir-942-5p	MIMAT0004985	EVC2	132884	HITS-CLIP	23824327	Unspecified
	hsa-mir-942-5p	MIMAT0004985	HNRNPA1L2	144983	HITS-CLIP	23313552	Unspecified
	hsa-mir-942-5p	MIMAT0004985	C15orf61	145853	HITS-CLIP	23824327	Unspecified
	hsa-mir-942-5p	MIMAT0004985	PRELID2	153768	PAR-CLIP	22291592	Unspecified
	hsa-mir-942-5p	MIMAT0004985	RNF217	154214	HITS-CLIP	19536157	Unspecified
	hsa-mir-942-5p	MIMAT0004985	FAM43B	163933	HITS-CLIP	23824327	Unspecified
	hsa-mir-942-5p	MIMAT0004985	CABP7	164633	HITS-CLIP	23824327	Unspecified
	hsa-mir-942-5p	MIMAT0004985	GPHA2	170589	HITS-CLIP	23824327	Unspecified
	hsa-mir-942-5p	MIMAT0004985	ADAMTS18	170692	HITS-CLIP	23824327	Unspecified
	hsa-mir-942-5p	MIMAT0004985	METTL15	196074	HITS-CLIP	19536157	Unspecified
	hsa-mir-942-5p	MIMAT0004985	IBA57	200205	HITS-CLIP	23824327	Unspecified
	hsa-mir-942-5p	MIMAT0004985	USF3	205717	HITS-CLIP	23824327	Unspecified
	hsa-mir-942-5p	MIMAT0004985	ALKBH3	221120	HITS-CLIP	19536157	Unspecified
	hsa-mir-942-5p	MIMAT0004985	ANKRD18A	253650	HITS-CLIP	19536157	Unspecified
	hsa-mir-942-5p	MIMAT0004985	TMEM151A	256472	HITS-CLIP	19536157	Unspecified
	hsa-mir-942-5p	MIMAT0004985	ZNF283	284349	HITS-CLIP	23824327	Unspecified
	hsa-mir-942-5p	MIMAT0004985	DUSP28	285193	HITS-CLIP	23824327	Unspecified
	hsa-mir-942-5p	MIMAT0004985	KRTAP21-2	337978	HITS-CLIP	19536157	Unspecified
	hsa-mir-942-5p	MIMAT0004985	SAMD7	344658	HITS-CLIP	19536157	Unspecified
	hsa-mir-942-5p	MIMAT0004985	IGLON5	402665	HITS-CLIP	23824327	Unspecified
	hsa-mir-942-5p	MIMAT0004985	POTEG	404785	HITS-CLIP//PAR-CLIP	20371350|23313552	Unspecified
	hsa-mir-942-5p	MIMAT0004985	CLLU1OS	574016	HITS-CLIP	19536157	Unspecified
	hsa-mir-942-5p	MIMAT0004985	ZNF704	619279	PAR-CLIP	26701625	Unspecified
	hsa-mir-942-5p	MIMAT0004985	POTEM	641455	PAR-CLIP	20371350	Unspecified
	hsa-mir-942-5p	MIMAT0004985	LINC00598	646982	HITS-CLIP	23824327	Unspecified
	hsa-mir-942-5p	MIMAT0004985	PCP4L1	654790	HITS-CLIP	23824327	Unspecified
	hsa-mir-942-5p	MIMAT0004985	CMC4	100272147	HITS-CLIP	19536157	Unspecified
	hsa-mir-664a-3p	MIMAT0005949	ADCYAP1R1	117	HITS-CLIP	23824327|23313552	Unspecified
	hsa-mir-664a-3p	MIMAT0005949	ARF6	382	PAR-CLIP	21572407	Unspecified
	hsa-mir-664a-3p	MIMAT0005949	BTD	686	PAR-CLIP	22100165	Unspecified
	hsa-mir-664a-3p	MIMAT0005949	CALM1	801	PAR-CLIP	21572407	Unspecified
	hsa-mir-664a-3p	MIMAT0005949	CREB1	1385	HITS-CLIP	23824327	Unspecified
	hsa-mir-664a-3p	MIMAT0005949	CTBP1	1487	PAR-CLIP	24398324|21572407|26701625|27292025	Unspecified
	hsa-mir-664a-3p	MIMAT0005949	CD55	1604	PAR-CLIP	23592263	Unspecified
	hsa-mir-664a-3p	MIMAT0005949	EDN1	1906	PAR-CLIP	23592263	Unspecified
	hsa-mir-664a-3p	MIMAT0005949	EN2	2020	HITS-CLIP	19536157	Unspecified
	hsa-mir-664a-3p	MIMAT0005949	FUS	2521	CLASH	23622248	Unspecified
	hsa-mir-664a-3p	MIMAT0005949	G6PC	2538	PAR-CLIP	22012620	Unspecified
	hsa-mir-664a-3p	MIMAT0005949	GNS	2799	PAR-CLIP	21572407	Unspecified
	hsa-mir-664a-3p	MIMAT0005949	GPR26	2849	HITS-CLIP	23824327	Unspecified
	hsa-mir-664a-3p	MIMAT0005949	H1F0	3005	PAR-CLIP	22012620	Unspecified
	hsa-mir-664a-3p	MIMAT0005949	HLF	3131	PAR-CLIP	22100165	Unspecified
	hsa-mir-664a-3p	MIMAT0005949	HPGD	3248	HITS-CLIP	19536157	Unspecified
	hsa-mir-664a-3p	MIMAT0005949	HSPA1B	3304	PAR-CLIP	20371350	Unspecified
	hsa-mir-664a-3p	MIMAT0005949	MAT1A	4143	Luciferase reporter assay	23241961	Unspecified
	hsa-mir-664a-3p	MIMAT0005949	MKI67	4288	PAR-CLIP	23446348	Unspecified
	hsa-mir-664a-3p	MIMAT0005949	PPM1A	5494	PAR-CLIP	20371350	Unspecified
	hsa-mir-664a-3p	MIMAT0005949	MAPK6	5597	PAR-CLIP	21572407	Unspecified
	hsa-mir-664a-3p	MIMAT0005949	MAPK8	5599	PAR-CLIP	24398324	Unspecified
	hsa-mir-664a-3p	MIMAT0005949	RAN	5901	PAR-CLIP	23446348|21572407|20371350	Unspecified
	hsa-mir-664a-3p	MIMAT0005949	RANGAP1	5905	HITS-CLIP	19536157	Unspecified
	hsa-mir-664a-3p	MIMAT0005949	RS1	6247	HITS-CLIP	23706177	Unspecified
	hsa-mir-664a-3p	MIMAT0005949	SNRPB2	6629	PAR-CLIP	24398324|23446348|21572407|20371350	Unspecified
	hsa-mir-664a-3p	MIMAT0005949	TPR	7175	PAR-CLIP	22012620	Unspecified
	hsa-mir-664a-3p	MIMAT0005949	UQCRFS1	7386	HITS-CLIP	27418678	Unspecified
	hsa-mir-664a-3p	MIMAT0005949	VLDLR	7436	HITS-CLIP	23824327	Unspecified
	hsa-mir-664a-3p	MIMAT0005949	WNT7A	7476	PAR-CLIP	22012620	Unspecified
	hsa-mir-664a-3p	MIMAT0005949	ZNF23	7571	PAR-CLIP	20371350	Unspecified
	hsa-mir-664a-3p	MIMAT0005949	ST8SIA4	7903	HITS-CLIP	23824327	Unspecified
	hsa-mir-664a-3p	MIMAT0005949	ARID1A	8289	PAR-CLIP	23592263	Unspecified
	hsa-mir-664a-3p	MIMAT0005949	CDK13	8621	HITS-CLIP	23824327	Unspecified
	hsa-mir-664a-3p	MIMAT0005949	RNMT	8731	HITS-CLIP	23313552	Unspecified
	hsa-mir-664a-3p	MIMAT0005949	RPS6KA5	9252	PAR-CLIP	21572407	Unspecified
	hsa-mir-664a-3p	MIMAT0005949	TXNL1	9352	HITS-CLIP	19536157	Unspecified
	hsa-mir-664a-3p	MIMAT0005949	MED23	9439	HITS-CLIP	19536157	Unspecified
	hsa-mir-664a-3p	MIMAT0005949	SEMA3E	9723	HITS-CLIP	27418678|28735896	Unspecified
	hsa-mir-664a-3p	MIMAT0005949	TSPAN2	10100	HITS-CLIP//PAR-CLIP	23446348|21572407|19536157	Unspecified
	hsa-mir-664a-3p	MIMAT0005949	PCGF3	10336	PAR-CLIP	23592263|23446348|20371350	Unspecified
	hsa-mir-664a-3p	MIMAT0005949	FAM3C	10447	PAR-CLIP	21572407|20371350	Unspecified
	hsa-mir-664a-3p	MIMAT0005949	SIVA1	10572	PAR-CLIP	20371350	Unspecified
	hsa-mir-664a-3p	MIMAT0005949	COLEC10	10584	HITS-CLIP	19536157	Unspecified
	hsa-mir-664a-3p	MIMAT0005949	SUB1	10923	PAR-CLIP	23446348|22012620	Unspecified
	hsa-mir-664a-3p	MIMAT0005949	AP3M2	10947	HITS-CLIP	23824327	Unspecified
	hsa-mir-664a-3p	MIMAT0005949	PTPRT	11122	PAR-CLIP	22291592	Unspecified
	hsa-mir-664a-3p	MIMAT0005949	CBX6	23466	PAR-CLIP	20371350	Unspecified
	hsa-mir-664a-3p	MIMAT0005949	CD2AP	23607	PAR-CLIP	21572407	Unspecified
	hsa-mir-664a-3p	MIMAT0005949	NIPBL	25836	HITS-CLIP	19536157	Unspecified
	hsa-mir-664a-3p	MIMAT0005949	KANK2	25959	HITS-CLIP	23824327	Unspecified
	hsa-mir-664a-3p	MIMAT0005949	SERBP1	26135	PAR-CLIP	20371350	Unspecified
	hsa-mir-664a-3p	MIMAT0005949	ZBTB44	29068	PAR-CLIP	21572407|20371350	Unspecified
	hsa-mir-664a-3p	MIMAT0005949	TMED5	50999	PAR-CLIP	23592263	Unspecified
	hsa-mir-664a-3p	MIMAT0005949	MAGEL2	54551	PAR-CLIP	22012620|27292025	Unspecified
	hsa-mir-664a-3p	MIMAT0005949	PHIP	55023	PAR-CLIP	21572407|20371350	Unspecified
	hsa-mir-664a-3p	MIMAT0005949	TMLHE	55217	PAR-CLIP	22012620	Unspecified
	hsa-mir-664a-3p	MIMAT0005949	MEG3	55384	Luciferase reporter assay//qRT-PCR//Western blot	28374914	Unspecified
	hsa-mir-664a-3p	MIMAT0005949	ZNF83	55769	PAR-CLIP	20371350	Unspecified
	hsa-mir-664a-3p	MIMAT0005949	ZNF415	55786	PAR-CLIP	20371350	Unspecified
	hsa-mir-664a-3p	MIMAT0005949	CACNA2D3	55799	PAR-CLIP	23592263	Unspecified
	hsa-mir-664a-3p	MIMAT0005949	ADAP2	55803	HITS-CLIP	19536157	Unspecified
	hsa-mir-664a-3p	MIMAT0005949	YAE1D1	57002	HITS-CLIP	23824327|19536157	Unspecified
	hsa-mir-664a-3p	MIMAT0005949	ZNF695	57116	PAR-CLIP	22012620	Unspecified
	hsa-mir-664a-3p	MIMAT0005949	KIAA1211	57482	PAR-CLIP	22100165	Unspecified
	hsa-mir-664a-3p	MIMAT0005949	TLDC1	57707	HITS-CLIP	23824327	Unspecified
	hsa-mir-664a-3p	MIMAT0005949	ZNF667	63934	PAR-CLIP	24398324|23446348|21572407|20371350	Unspecified
	hsa-mir-664a-3p	MIMAT0005949	MFSD14A	64645	CLASH	23622248	Unspecified
	hsa-mir-664a-3p	MIMAT0005949	EXO5	64789	PAR-CLIP	22012620|21572407	Unspecified
	hsa-mir-664a-3p	MIMAT0005949	ARSJ	79642	PAR-CLIP	21572407	Unspecified
	hsa-mir-664a-3p	MIMAT0005949	POF1B	79983	PAR-CLIP	22012620	Unspecified
	hsa-mir-664a-3p	MIMAT0005949	DCAF17	80067	HITS-CLIP	23706177	Unspecified
	hsa-mir-664a-3p	MIMAT0005949	CHD9	80205	HITS-CLIP	23313552	Unspecified
	hsa-mir-664a-3p	MIMAT0005949	SOX7	83595	ELISA//Luciferase reporter assay//qRT-PCR//Western blot	26515813	Unspecified
	hsa-mir-664a-3p	MIMAT0005949	PPP1R15B	84919	PAR-CLIP	23592263|21572407|20371350|27292025	Unspecified
	hsa-mir-664a-3p	MIMAT0005949	UNK	85451	HITS-CLIP	21572407	Unspecified
	hsa-mir-664a-3p	MIMAT0005949	SIGLEC10	89790	HITS-CLIP	23824327	Unspecified
	hsa-mir-664a-3p	MIMAT0005949	NAV2	89797	HITS-CLIP	23824327	Unspecified
	hsa-mir-664a-3p	MIMAT0005949	SPPL3	121665	PAR-CLIP	21572407	Unspecified
	hsa-mir-664a-3p	MIMAT0005949	DYNLL2	140735	PAR-CLIP	23446348|20371350	Unspecified
	hsa-mir-664a-3p	MIMAT0005949	ARL6IP6	151188	PAR-CLIP	22291592	Unspecified
	hsa-mir-664a-3p	MIMAT0005949	SLC35G1	159371	PAR-CLIP	22100165	Unspecified
	hsa-mir-664a-3p	MIMAT0005949	OLIG3	167826	PAR-CLIP	23592263|22012620|21572407|20371350|26701625|27292025	Unspecified
	hsa-mir-664a-3p	MIMAT0005949	KRTAP13-2	337959	PAR-CLIP	22012620|27292025	Unspecified
	hsa-mir-664a-3p	MIMAT0005949	ZNF678	339500	PAR-CLIP	21572407	Unspecified
	hsa-mir-664a-3p	MIMAT0005949	BEND4	389206	PAR-CLIP	21572407	Unspecified
	hsa-mir-664a-3p	MIMAT0005949	ZBTB34	403341	HITS-CLIP//PAR-CLIP	24398324|23446348|21572407|20371350	Unspecified
	hsa-mir-664a-3p	MIMAT0005949	GTF2H5	404672	HITS-CLIP	23824327	Unspecified
	hsa-mir-664a-3p	MIMAT0005949	WEE2	494551	HITS-CLIP	23824327	Unspecified
	hsa-mir-664a-3p	MIMAT0005949	ZNF487	642819	PAR-CLIP	21572407	Unspecified
	hsa-mir-664a-3p	MIMAT0005949	LINC00598	646982	PAR-CLIP	20371350	Unspecified
	hsa-mir-1914-3p	MIMAT0007890	ALDOC	230	HITS-CLIP	23824327	Unspecified
	hsa-mir-1914-3p	MIMAT0007890	APEX1	328	PAR-CLIP	26701625	Unspecified
	hsa-mir-1914-3p	MIMAT0007890	ARRB2	409	PAR-CLIP	23592263	Unspecified
	hsa-mir-1914-3p	MIMAT0007890	ASPH	444	PAR-CLIP	23592263	Unspecified
	hsa-mir-1914-3p	MIMAT0007890	BAK1	578	PAR-CLIP	20371350	Unspecified
	hsa-mir-1914-3p	MIMAT0007890	CALM3	808	PAR-CLIP	23446348|26701625	Unspecified
	hsa-mir-1914-3p	MIMAT0007890	CALR	811	PAR-CLIP	23592263	Unspecified
	hsa-mir-1914-3p	MIMAT0007890	CFL1	1072	PAR-CLIP	26701625	Unspecified
	hsa-mir-1914-3p	MIMAT0007890	CLCN7	1186	PAR-CLIP	23592263	Unspecified
	hsa-mir-1914-3p	MIMAT0007890	CREB1	1385	PAR-CLIP	22291592	Unspecified
	hsa-mir-1914-3p	MIMAT0007890	E2F3	1871	PAR-CLIP	23592263	Unspecified
	hsa-mir-1914-3p	MIMAT0007890	DMTN	2039	PAR-CLIP	26701625	Unspecified
	hsa-mir-1914-3p	MIMAT0007890	HLA-DOA	3111	PAR-CLIP	23592263	Unspecified
	hsa-mir-1914-3p	MIMAT0007890	IGF2	3481	PAR-CLIP	23592263	Unspecified
	hsa-mir-1914-3p	MIMAT0007890	KRT8	3856	PAR-CLIP	24398324	Unspecified
	hsa-mir-1914-3p	MIMAT0007890	LASP1	3927	PAR-CLIP	23592263|26701625	Unspecified
	hsa-mir-1914-3p	MIMAT0007890	MAFG	4097	PAR-CLIP	26701625	Unspecified
	hsa-mir-1914-3p	MIMAT0007890	MAP3K9	4293	PAR-CLIP	23592263	Unspecified
	hsa-mir-1914-3p	MIMAT0007890	MMP17	4326	PAR-CLIP	20371350	Unspecified
	hsa-mir-1914-3p	MIMAT0007890	MSN	4478	PAR-CLIP	26701625	Unspecified
	hsa-mir-1914-3p	MIMAT0007890	NFIC	4782	PAR-CLIP	23592263	Unspecified
	hsa-mir-1914-3p	MIMAT0007890	NFIX	4784	PAR-CLIP	27292025	Unspecified
	hsa-mir-1914-3p	MIMAT0007890	OGDH	4967	PAR-CLIP	26701625|27292025	Unspecified
	hsa-mir-1914-3p	MIMAT0007890	OLR1	4973	PAR-CLIP	23592263	Unspecified
	hsa-mir-1914-3p	MIMAT0007890	PLAGL2	5326	PAR-CLIP	20371350|26701625	Unspecified
	hsa-mir-1914-3p	MIMAT0007890	PLCG1	5335	CLASH	23622248	Unspecified
	hsa-mir-1914-3p	MIMAT0007890	PPIA	5478	PAR-CLIP	27292025	Unspecified
	hsa-mir-1914-3p	MIMAT0007890	PPIB	5479	PAR-CLIP	26701625	Unspecified
	hsa-mir-1914-3p	MIMAT0007890	PPP1R10	5514	CLASH	23622248	Unspecified
	hsa-mir-1914-3p	MIMAT0007890	RAB5C	5878	PAR-CLIP	27292025	Unspecified
	hsa-mir-1914-3p	MIMAT0007890	SHMT1	6470	PAR-CLIP	22012620|27292025	Unspecified
	hsa-mir-1914-3p	MIMAT0007890	SLC2A5	6518	HITS-CLIP	23313552	Unspecified
	hsa-mir-1914-3p	MIMAT0007890	SLC16A1	6566	PAR-CLIP	20371350	Unspecified
	hsa-mir-1914-3p	MIMAT0007890	SP1	6667	PAR-CLIP	23592263	Unspecified
	hsa-mir-1914-3p	MIMAT0007890	SRM	6723	PAR-CLIP	23446348|21572407|20371350|26701625	Unspecified
	hsa-mir-1914-3p	MIMAT0007890	STAT5B	6777	PAR-CLIP	22291592	Unspecified
	hsa-mir-1914-3p	MIMAT0007890	STIM1	6786	PAR-CLIP	27292025	Unspecified
	hsa-mir-1914-3p	MIMAT0007890	TACR3	6870	PAR-CLIP	23592263	Unspecified
	hsa-mir-1914-3p	MIMAT0007890	TMBIM6	7009	PAR-CLIP	23592263|23446348	Unspecified
	hsa-mir-1914-3p	MIMAT0007890	TLR5	7100	PAR-CLIP	23592263	Unspecified
	hsa-mir-1914-3p	MIMAT0007890	UBE2V1	7335	PAR-CLIP	23592263	Unspecified
	hsa-mir-1914-3p	MIMAT0007890	YWHAE	7531	PAR-CLIP	23592263	Unspecified
	hsa-mir-1914-3p	MIMAT0007890	ZNF212	7988	PAR-CLIP	23592263	Unspecified
	hsa-mir-1914-3p	MIMAT0007890	MLF 2.00	8079	PAR-CLIP	26701625|27292025	Unspecified
	hsa-mir-1914-3p	MIMAT0007890	PABPN1	8106	PAR-CLIP	26701625	Unspecified
	hsa-mir-1914-3p	MIMAT0007890	TPST2	8459	PAR-CLIP	22100165	Unspecified
	hsa-mir-1914-3p	MIMAT0007890	TMEM11	8834	HITS-CLIP	19536157	Unspecified
	hsa-mir-1914-3p	MIMAT0007890	MTMR3	8897	PAR-CLIP	26701625	Unspecified
	hsa-mir-1914-3p	MIMAT0007890	GPRC5A	9052	PAR-CLIP	23592263|26701625	Unspecified
	hsa-mir-1914-3p	MIMAT0007890	MTA1	9112	HITS-CLIP//PAR-CLIP	23313552|26701625	Unspecified
	hsa-mir-1914-3p	MIMAT0007890	ARHGEF2	9181	PAR-CLIP	23592263	Unspecified
	hsa-mir-1914-3p	MIMAT0007890	KIF3B	9371	HITS-CLIP	27418678	Unspecified
	hsa-mir-1914-3p	MIMAT0007890	NUP93	9688	PAR-CLIP	22012620|20371350	Unspecified
	hsa-mir-1914-3p	MIMAT0007890	NOS1AP	9722	PAR-CLIP	23592263	Unspecified
	hsa-mir-1914-3p	MIMAT0007890	KMT2B	9757	PAR-CLIP	26701625	Unspecified
	hsa-mir-1914-3p	MIMAT0007890	IP6K1	9807	PAR-CLIP	23592263	Unspecified
	hsa-mir-1914-3p	MIMAT0007890	SPATA2	9825	PAR-CLIP	27292025	Unspecified
	hsa-mir-1914-3p	MIMAT0007890	ABCC5	10057	PAR-CLIP	23592263|24398324	Unspecified
	hsa-mir-1914-3p	MIMAT0007890	SCAMP2	10066	PAR-CLIP	26701625	Unspecified
	hsa-mir-1914-3p	MIMAT0007890	ARPC3	10094	PAR-CLIP	20371350	Unspecified
	hsa-mir-1914-3p	MIMAT0007890	WASF2	10163	PAR-CLIP	26701625	Unspecified
	hsa-mir-1914-3p	MIMAT0007890	EIF1	10209	PAR-CLIP	23592263|20371350	Unspecified
	hsa-mir-1914-3p	MIMAT0007890	TXNIP	10628	PAR-CLIP	24398324|23446348|20371350	Unspecified
	hsa-mir-1914-3p	MIMAT0007890	FAM189B	10712	HITS-CLIP	23313552	Unspecified
	hsa-mir-1914-3p	MIMAT0007890	2021-09-09	10801	PAR-CLIP	26701625	Unspecified
	hsa-mir-1914-3p	MIMAT0007890	ADIRF	10974	PAR-CLIP	26701625	Unspecified
	hsa-mir-1914-3p	MIMAT0007890	RBPJL	11317	PAR-CLIP	24398324	Unspecified
	hsa-mir-1914-3p	MIMAT0007890	VASH1	22846	PAR-CLIP	23592263	Unspecified
	hsa-mir-1914-3p	MIMAT0007890	ZNF609	23060	PAR-CLIP	26701625	Unspecified
	hsa-mir-1914-3p	MIMAT0007890	RAP1GAP2	23108	PAR-CLIP	20371350	Unspecified
	hsa-mir-1914-3p	MIMAT0007890	TAB2	23118	PAR-CLIP	23592263	Unspecified
	hsa-mir-1914-3p	MIMAT0007890	CAMTA2	23125	PAR-CLIP	26701625	Unspecified
	hsa-mir-1914-3p	MIMAT0007890	PLXND1	23129	PAR-CLIP	23592263	Unspecified
	hsa-mir-1914-3p	MIMAT0007890	TTLL12	23170	PAR-CLIP	26701625	Unspecified
	hsa-mir-1914-3p	MIMAT0007890	2021-09-08	23176	HITS-CLIP//PAR-CLIP	23592263|24398324|23446348|22012620|21572407|20371350|24906430|23706177|26701625|27292025	Unspecified
	hsa-mir-1914-3p	MIMAT0007890	LARP1	23367	PAR-CLIP	26701625	Unspecified
	hsa-mir-1914-3p	MIMAT0007890	CTDNEP1	23399	PAR-CLIP	23592263	Unspecified
	hsa-mir-1914-3p	MIMAT0007890	NCS1	23413	HITS-CLIP	23824327	Unspecified
	hsa-mir-1914-3p	MIMAT0007890	SF3B3	23450	PAR-CLIP	23446348	Unspecified
	hsa-mir-1914-3p	MIMAT0007890	NPTXR	23467	PAR-CLIP	26701625	Unspecified
	hsa-mir-1914-3p	MIMAT0007890	PTCD1	26024	CLASH	23622248	Unspecified
	hsa-mir-1914-3p	MIMAT0007890	ANKRD11	29123	CLASH	23622248	Unspecified
	hsa-mir-1914-3p	MIMAT0007890	ZC2HC1A	51101	HITS-CLIP	23824327	Unspecified
	hsa-mir-1914-3p	MIMAT0007890	GDE1	51573	PAR-CLIP	27292025	Unspecified
	hsa-mir-1914-3p	MIMAT0007890	GPN2	54707	PAR-CLIP	23446348	Unspecified
	hsa-mir-1914-3p	MIMAT0007890	FBLIM1	54751	HITS-CLIP	23824327	Unspecified
	hsa-mir-1914-3p	MIMAT0007890	SBNO1	55206	PAR-CLIP	26701625	Unspecified
	hsa-mir-1914-3p	MIMAT0007890	WDR33	55339	CLASH	23622248	Unspecified
	hsa-mir-1914-3p	MIMAT0007890	TRMU	55687	PAR-CLIP	26701625	Unspecified
	hsa-mir-1914-3p	MIMAT0007890	ZMAT5	55954	PAR-CLIP	23592263	Unspecified
	hsa-mir-1914-3p	MIMAT0007890	AJAP1	55966	HITS-CLIP	19536157	Unspecified
	hsa-mir-1914-3p	MIMAT0007890	WDR45B	56270	PAR-CLIP	26701625	Unspecified
	hsa-mir-1914-3p	MIMAT0007890	KCNQ5	56479	HITS-CLIP	24906430|27418678	Unspecified
	hsa-mir-1914-3p	MIMAT0007890	BARHL1	56751	PAR-CLIP	23592263|23446348|20371350	Unspecified
	hsa-mir-1914-3p	MIMAT0007890	RAD18	56852	PAR-CLIP	21572407	Unspecified
	hsa-mir-1914-3p	MIMAT0007890	REXO1	57455	PAR-CLIP	23592263|26701625	Unspecified
	hsa-mir-1914-3p	MIMAT0007890	PNMA8B	57469	PAR-CLIP	23592263	Unspecified
	hsa-mir-1914-3p	MIMAT0007890	PDP2	57546	PAR-CLIP	23592263	Unspecified
	hsa-mir-1914-3p	MIMAT0007890	C6orf106	64771	PAR-CLIP	23592263	Unspecified
	hsa-mir-1914-3p	MIMAT0007890	CDK15	65061	HITS-CLIP	24906430|27418678	Unspecified
	hsa-mir-1914-3p	MIMAT0007890	YIPF2	78992	PAR-CLIP	23592263	Unspecified
	hsa-mir-1914-3p	MIMAT0007890	ATG9A	79065	PAR-CLIP	23592263|26701625	Unspecified
	hsa-mir-1914-3p	MIMAT0007890	RIN3	79890	PAR-CLIP	23592263	Unspecified
	hsa-mir-1914-3p	MIMAT0007890	PTGES2	80142	PAR-CLIP	26701625	Unspecified
	hsa-mir-1914-3p	MIMAT0007890	MED28	80306	PAR-CLIP	23446348	Unspecified
	hsa-mir-1914-3p	MIMAT0007890	SRCIN1	80725	HITS-CLIP	19536157	Unspecified
	hsa-mir-1914-3p	MIMAT0007890	TTYH3	80727	PAR-CLIP	26701625	Unspecified
	hsa-mir-1914-3p	MIMAT0007890	SPRY4	81848	PAR-CLIP	23592263|26701625	Unspecified
	hsa-mir-1914-3p	MIMAT0007890	RPS6KL1	83694	PAR-CLIP	27292025	Unspecified
	hsa-mir-1914-3p	MIMAT0007890	SPNS1	83985	PAR-CLIP	23592263	Unspecified
	hsa-mir-1914-3p	MIMAT0007890	PPP1R9B	84687	PAR-CLIP	26701625	Unspecified
	hsa-mir-1914-3p	MIMAT0007890	LMNB2	84823	PAR-CLIP	26701625	Unspecified
	hsa-mir-1914-3p	MIMAT0007890	SHANK3	85358	PAR-CLIP	26701625	Unspecified
	hsa-mir-1914-3p	MIMAT0007890	NAV1	89796	PAR-CLIP	23592263	Unspecified
	hsa-mir-1914-3p	MIMAT0007890	MSANTD3	91283	PAR-CLIP	23592263	Unspecified
	hsa-mir-1914-3p	MIMAT0007890	ANKRD40	91369	PAR-CLIP	23592263|26701625	Unspecified
	hsa-mir-1914-3p	MIMAT0007890	MEX3A	92312	PAR-CLIP	23592263	Unspecified
	hsa-mir-1914-3p	MIMAT0007890	NACC1	112939	PAR-CLIP	26701625	Unspecified
	hsa-mir-1914-3p	MIMAT0007890	EVI5L	115704	PAR-CLIP	23592263	Unspecified
	hsa-mir-1914-3p	MIMAT0007890	ZC3H18	124245	CLASH	23622248	Unspecified
	hsa-mir-1914-3p	MIMAT0007890	WFIKKN2	124857	PAR-CLIP	23592263	Unspecified
	hsa-mir-1914-3p	MIMAT0007890	ZNF787	126208	PAR-CLIP	26701625	Unspecified
	hsa-mir-1914-3p	MIMAT0007890	C22orf39	128977	PAR-CLIP	26701625	Unspecified
	hsa-mir-1914-3p	MIMAT0007890	ZBTB46	140685	PAR-CLIP	23592263|24398324|22012620|20371350|26701625	Unspecified
	hsa-mir-1914-3p	MIMAT0007890	EIF5AL1	143244	PAR-CLIP	27292025	Unspecified
	hsa-mir-1914-3p	MIMAT0007890	TMEM86A	144110	PAR-CLIP	22012620	Unspecified
	hsa-mir-1914-3p	MIMAT0007890	NRG4	145957	PAR-CLIP	23592263	Unspecified
	hsa-mir-1914-3p	MIMAT0007890	RNF187	149603	PAR-CLIP	26701625	Unspecified
	hsa-mir-1914-3p	MIMAT0007890	ITPRIPL2	162073	HITS-CLIP	23313552	Unspecified
	hsa-mir-1914-3p	MIMAT0007890	REEP3	221035	HITS-CLIP	27418678	Unspecified
	hsa-mir-1914-3p	MIMAT0007890	FOXK1	221937	PAR-CLIP	26701625|27292025	Unspecified
	hsa-mir-1914-3p	MIMAT0007890	RPL7L1	285855	PAR-CLIP	26701625	Unspecified
	hsa-mir-1914-3p	MIMAT0007890	MCRIP1	348262	PAR-CLIP	23592263|20371350	Unspecified
	hsa-mir-1914-3p	MIMAT0007890	HSD11B1L	374875	PAR-CLIP	23592263	Unspecified
	hsa-mir-1914-3p	MIMAT0007890	GJB7	375519	PAR-CLIP	22012620	Unspecified
	hsa-mir-1914-3p	MIMAT0007890	TMEM189	387521	PAR-CLIP	23592263	Unspecified
	hsa-mir-1914-3p	MIMAT0007890	TMEM189-UBE2V1	387522	PAR-CLIP	23592263	Unspecified
	hsa-mir-1914-3p	MIMAT0007890	KMT5A	387893	PAR-CLIP	23592263	Unspecified
	hsa-mir-1914-3p	MIMAT0007890	ZNF805	390980	PAR-CLIP	27292025	Unspecified
	hsa-mir-1914-3p	MIMAT0007890	RNF165	494470	HITS-CLIP	23824327	Unspecified
	hsa-mir-1914-3p	MIMAT0007890	PCP4L1	654790	PAR-CLIP	22100165	Unspecified
	hsa-mir-3065-3p	MIMAT0015378	ACOX1	51	HITS-CLIP	19536157	Unspecified
	hsa-mir-3065-3p	MIMAT0015378	C8A	731	HITS-CLIP	19536157	Unspecified
	hsa-mir-3065-3p	MIMAT0015378	MS4A1	931	HITS-CLIP	19536157	Unspecified
	hsa-mir-3065-3p	MIMAT0015378	CDC25B	994	PAR-CLIP	23592263	Unspecified
	hsa-mir-3065-3p	MIMAT0015378	EIF4EBP2	1979	HITS-CLIP	23824327	Unspecified
	hsa-mir-3065-3p	MIMAT0015378	GPC4	2239	HITS-CLIP	23824327	Unspecified
	hsa-mir-3065-3p	MIMAT0015378	FOS	2353	PAR-CLIP	23592263	Unspecified
	hsa-mir-3065-3p	MIMAT0015378	GNAI3	2773	PAR-CLIP	26701625	Unspecified
	hsa-mir-3065-3p	MIMAT0015378	GRINA	2907	PAR-CLIP	23592263	Unspecified
	hsa-mir-3065-3p	MIMAT0015378	GSK3B	2932	HITS-CLIP	23824327	Unspecified
	hsa-mir-3065-3p	MIMAT0015378	SLC29A2	3177	PAR-CLIP	23592263	Unspecified
	hsa-mir-3065-3p	MIMAT0015378	ITGA5	3678	HITS-CLIP	23313552	Unspecified
	hsa-mir-3065-3p	MIMAT0015378	KCNN1	3780	PAR-CLIP	22012620	Unspecified
	hsa-mir-3065-3p	MIMAT0015378	KPNA1	3836	PAR-CLIP	21572407|20371350	Unspecified
	hsa-mir-3065-3p	MIMAT0015378	LMNB1	4001	PAR-CLIP	21572407	Unspecified
	hsa-mir-3065-3p	MIMAT0015378	ENPP2	5168	PAR-CLIP	22012620	Unspecified
	hsa-mir-3065-3p	MIMAT0015378	PPIB	5479	PAR-CLIP	23446348	Unspecified
	hsa-mir-3065-3p	MIMAT0015378	REL	5966	PAR-CLIP	23592263	Unspecified
	hsa-mir-3065-3p	MIMAT0015378	RPS24	6229	HITS-CLIP	23313552	Unspecified
	hsa-mir-3065-3p	MIMAT0015378	VPS52	6293	PAR-CLIP	26701625	Unspecified
	hsa-mir-3065-3p	MIMAT0015378	STX3	6809	PAR-CLIP	27292025	Unspecified
	hsa-mir-3065-3p	MIMAT0015378	SURF2	6835	PAR-CLIP	27292025	Unspecified
	hsa-mir-3065-3p	MIMAT0015378	TARS	6897	PAR-CLIP	22012620	Unspecified
	hsa-mir-3065-3p	MIMAT0015378	TIAL1	7073	HITS-CLIP	23824327	Unspecified
	hsa-mir-3065-3p	MIMAT0015378	TUBB2A	7280	PAR-CLIP	20371350	Unspecified
	hsa-mir-3065-3p	MIMAT0015378	TYRO3	7301	HITS-CLIP	19536157	Unspecified
	hsa-mir-3065-3p	MIMAT0015378	UBE2G2	7327	PAR-CLIP	23446348	Unspecified
	hsa-mir-3065-3p	MIMAT0015378	UBE2V1	7335	PAR-CLIP	21572407	Unspecified
	hsa-mir-3065-3p	MIMAT0015378	VHL	7428	PAR-CLIP	23592263|21572407|26701625|27292025	Unspecified
	hsa-mir-3065-3p	MIMAT0015378	XPC	7508	PAR-CLIP	26701625	Unspecified
	hsa-mir-3065-3p	MIMAT0015378	ZNF45	7596	PAR-CLIP	20371350	Unspecified
	hsa-mir-3065-3p	MIMAT0015378	SLC7A5	8140	PAR-CLIP	26701625	Unspecified
	hsa-mir-3065-3p	MIMAT0015378	STX16	8675	PAR-CLIP	22100165	Unspecified
	hsa-mir-3065-3p	MIMAT0015378	DGAT1	8694	HITS-CLIP	19536157	Unspecified
	hsa-mir-3065-3p	MIMAT0015378	SLC7A7	9056	PAR-CLIP	22012620	Unspecified
	hsa-mir-3065-3p	MIMAT0015378	EI24	9538	PAR-CLIP	22012620	Unspecified
	hsa-mir-3065-3p	MIMAT0015378	TRAM2	9697	PAR-CLIP	23592263|26701625	Unspecified
	hsa-mir-3065-3p	MIMAT0015378	RIMS2	9699	HITS-CLIP	23824327	Unspecified
	hsa-mir-3065-3p	MIMAT0015378	TSC22D2	9819	PAR-CLIP	20371350	Unspecified
	hsa-mir-3065-3p	MIMAT0015378	ZBTB5	9925	PAR-CLIP	23592263|21572407|26701625	Unspecified
	hsa-mir-3065-3p	MIMAT0015378	GLRX3	10539	PAR-CLIP	27292025	Unspecified
	hsa-mir-3065-3p	MIMAT0015378	SLU7	10569	HITS-CLIP	23824327	Unspecified
	hsa-mir-3065-3p	MIMAT0015378	COLEC10	10584	HITS-CLIP	19536157	Unspecified
	hsa-mir-3065-3p	MIMAT0015378	CEP162	22832	HITS-CLIP	23824327	Unspecified
	hsa-mir-3065-3p	MIMAT0015378	MLXIP	22877	HITS-CLIP	23313552	Unspecified
	hsa-mir-3065-3p	MIMAT0015378	MAPKBP1	23005	HITS-CLIP	19536157	Unspecified
	hsa-mir-3065-3p	MIMAT0015378	ZC3H4	23211	HITS-CLIP	23313552	Unspecified
	hsa-mir-3065-3p	MIMAT0015378	SLC9A8	23315	HITS-CLIP	23824327	Unspecified
	hsa-mir-3065-3p	MIMAT0015378	CLASP1	23332	HITS-CLIP	24906430|23824327|23313552|27418678|28735896	Unspecified
	hsa-mir-3065-3p	MIMAT0015378	NCS1	23413	PAR-CLIP	23592263|26701625	Unspecified
	hsa-mir-3065-3p	MIMAT0015378	CBX5	23468	PAR-CLIP	21572407	Unspecified
	hsa-mir-3065-3p	MIMAT0015378	CD2AP	23607	PAR-CLIP	21572407	Unspecified
	hsa-mir-3065-3p	MIMAT0015378	FJX1	24147	PAR-CLIP	22012620	Unspecified
	hsa-mir-3065-3p	MIMAT0015378	PPP1R16B	26051	PAR-CLIP	20371350|26701625	Unspecified
	hsa-mir-3065-3p	MIMAT0015378	CCDC59	29080	HITS-CLIP	19536157	Unspecified
	hsa-mir-3065-3p	MIMAT0015378	GPSM2	29899	HITS-CLIP	19536157	Unspecified
	hsa-mir-3065-3p	MIMAT0015378	ZBTB7B	51043	PAR-CLIP	26701625	Unspecified
	hsa-mir-3065-3p	MIMAT0015378	ING4	51147	PAR-CLIP	26701625	Unspecified
	hsa-mir-3065-3p	MIMAT0015378	ARL6IP4	51329	HITS-CLIP	19536157	Unspecified
	hsa-mir-3065-3p	MIMAT0015378	CHMP3	51652	PAR-CLIP	22012620|21572407	Unspecified
	hsa-mir-3065-3p	MIMAT0015378	C21orf91	54149	PAR-CLIP	22012620	Unspecified
	hsa-mir-3065-3p	MIMAT0015378	QPCTL	54814	HITS-CLIP	23313552	Unspecified
	hsa-mir-3065-3p	MIMAT0015378	RETSAT	54884	HITS-CLIP	19536157	Unspecified
	hsa-mir-3065-3p	MIMAT0015378	TMEM74B	55321	PAR-CLIP	22012620	Unspecified
	hsa-mir-3065-3p	MIMAT0015378	HES4	57801	PAR-CLIP	23592263|23446348|22012620|20371350|26701625|27292025	Unspecified
	hsa-mir-3065-3p	MIMAT0015378	RINT1	60561	CLASH	23622248	Unspecified
	hsa-mir-3065-3p	MIMAT0015378	FBRS	64319	HITS-CLIP	23313552	Unspecified
	hsa-mir-3065-3p	MIMAT0015378	NUCKS1	64710	PAR-CLIP	21572407	Unspecified
	hsa-mir-3065-3p	MIMAT0015378	IPPK	64768	HITS-CLIP	19536157	Unspecified
	hsa-mir-3065-3p	MIMAT0015378	MRPL41	64975	HITS-CLIP	19536157	Unspecified
	hsa-mir-3065-3p	MIMAT0015378	TMEM237	65062	PAR-CLIP	22291592	Unspecified
	hsa-mir-3065-3p	MIMAT0015378	PHACTR4	65979	PAR-CLIP	26701625	Unspecified
	hsa-mir-3065-3p	MIMAT0015378	CEP97	79598	PAR-CLIP	27292025	Unspecified
	hsa-mir-3065-3p	MIMAT0015378	NAA40	79829	PAR-CLIP	23592263	Unspecified
	hsa-mir-3065-3p	MIMAT0015378	C3orf36	80111	HITS-CLIP	23824327	Unspecified
	hsa-mir-3065-3p	MIMAT0015378	RAB11FIP1	80223	HITS-CLIP	23824327	Unspecified
	hsa-mir-3065-3p	MIMAT0015378	WDR26	80232	PAR-CLIP	23592263	Unspecified
	hsa-mir-3065-3p	MIMAT0015378	LRRC27	80313	PAR-CLIP	23446348	Unspecified
	hsa-mir-3065-3p	MIMAT0015378	CLPB	81570	PAR-CLIP	27292025	Unspecified
	hsa-mir-3065-3p	MIMAT0015378	URM1	81605	PAR-CLIP	23592263|20371350	Unspecified
	hsa-mir-3065-3p	MIMAT0015378	RBM4B	83759	PAR-CLIP	23446348	Unspecified
	hsa-mir-3065-3p	MIMAT0015378	DCTN5	84516	PAR-CLIP	22291592	Unspecified
	hsa-mir-3065-3p	MIMAT0015378	TNRC18	84629	PAR-CLIP	26701625	Unspecified
	hsa-mir-3065-3p	MIMAT0015378	UNC119B	84747	PAR-CLIP	22012620	Unspecified
	hsa-mir-3065-3p	MIMAT0015378	LRCH3	84859	HITS-CLIP	23824327	Unspecified
	hsa-mir-3065-3p	MIMAT0015378	FIZ1	84922	PAR-CLIP	23592263	Unspecified
	hsa-mir-3065-3p	MIMAT0015378	CGNL1	84952	PAR-CLIP	27292025	Unspecified
	hsa-mir-3065-3p	MIMAT0015378	MIDN	90007	HITS-CLIP	23313552	Unspecified
	hsa-mir-3065-3p	MIMAT0015378	PIGS	94005	HITS-CLIP	23824327	Unspecified
	hsa-mir-3065-3p	MIMAT0015378	BTBD9	114781	HITS-CLIP	19536157	Unspecified
	hsa-mir-3065-3p	MIMAT0015378	ESCO1	114799	HITS-CLIP	19536157	Unspecified
	hsa-mir-3065-3p	MIMAT0015378	C1QTNF6	114904	PAR-CLIP	23592263	Unspecified
	hsa-mir-3065-3p	MIMAT0015378	SLC26A9	115019	HITS-CLIP	23824327	Unspecified
	hsa-mir-3065-3p	MIMAT0015378	TNFRSF13C	115650	PAR-CLIP	22012620	Unspecified
	hsa-mir-3065-3p	MIMAT0015378	AGAP1	116987	PAR-CLIP	26701625	Unspecified
	hsa-mir-3065-3p	MIMAT0015378	ZNF354B	117608	HITS-CLIP//PAR-CLIP	23446348|22012620|21572407|20371350|23706177	Unspecified
	hsa-mir-3065-3p	MIMAT0015378	GJD3	125111	HITS-CLIP	23824327	Unspecified
	hsa-mir-3065-3p	MIMAT0015378	FAM109A	144717	HITS-CLIP	27418678	Unspecified
	hsa-mir-3065-3p	MIMAT0015378	C4orf26	152816	PAR-CLIP	26701625	Unspecified
	hsa-mir-3065-3p	MIMAT0015378	TOR1AIP2	163590	HITS-CLIP	23824327	Unspecified
	hsa-mir-3065-3p	MIMAT0015378	TOGARAM2	165186	HITS-CLIP	19536157	Unspecified
	hsa-mir-3065-3p	MIMAT0015378	TET3	200424	PAR-CLIP	23592263	Unspecified
	hsa-mir-3065-3p	MIMAT0015378	DENND6A	201627	PAR-CLIP	26701625	Unspecified
	hsa-mir-3065-3p	MIMAT0015378	SLC37A2	219855	PAR-CLIP	26701625	Unspecified
	hsa-mir-3065-3p	MIMAT0015378	C2orf72	257407	PAR-CLIP	23592263|23446348|22012620|20371350|26701625|27292025	Unspecified
	hsa-mir-3065-3p	MIMAT0015378	FAM102B	284611	PAR-CLIP	23592263	Unspecified
	hsa-mir-3065-3p	MIMAT0015378	MYLK4	340156	HITS-CLIP	23824327	Unspecified
	hsa-mir-3065-3p	MIMAT0015378	NDUFA4P1	360165	HITS-CLIP	23824327	Unspecified
	hsa-mir-3065-3p	MIMAT0015378	TMEM189	387521	PAR-CLIP	21572407	Unspecified
	hsa-mir-3065-3p	MIMAT0015378	TMEM189-UBE2V1	387522	PAR-CLIP	21572407	Unspecified
	hsa-mir-3065-3p	MIMAT0015378	C2orf71	388939	PAR-CLIP	20371350	Unspecified
	hsa-mir-3065-3p	MIMAT0015378	RNF103-CHMP3	100526767	PAR-CLIP	22012620|21572407	Unspecified
	hsa-mir-4290	MIMAT0016921	ALDOA	226	PAR-CLIP	27292025	Unspecified
	hsa-mir-4290	MIMAT0016921	ATP2B4	493	PAR-CLIP	22291592	Unspecified
	hsa-mir-4290	MIMAT0016921	CAPN6	827	HITS-CLIP	19536157	Unspecified
	hsa-mir-4290	MIMAT0016921	CDK2	1017	PAR-CLIP	26701625	Unspecified
	hsa-mir-4290	MIMAT0016921	CDK9	1025	HITS-CLIP	23313552	Unspecified
	hsa-mir-4290	MIMAT0016921	CDKN1A	1026	PAR-CLIP	23592263|22012620|26701625	Unspecified
	hsa-mir-4290	MIMAT0016921	CRKL	1399	PAR-CLIP	20371350	Unspecified
	hsa-mir-4290	MIMAT0016921	CS	1431	PAR-CLIP	26701625	Unspecified
	hsa-mir-4290	MIMAT0016921	CYP27B1	1594	HITS-CLIP	19536157	Unspecified
	hsa-mir-4290	MIMAT0016921	DUSP4	1846	HITS-CLIP	23824327	Unspecified
	hsa-mir-4290	MIMAT0016921	ESR1	2099	HITS-CLIP	23824327	Unspecified
	hsa-mir-4290	MIMAT0016921	F3	2152	PAR-CLIP	27292025	Unspecified
	hsa-mir-4290	MIMAT0016921	GPR26	2849	HITS-CLIP	23824327	Unspecified
	hsa-mir-4290	MIMAT0016921	GRINA	2907	PAR-CLIP	23592263	Unspecified
	hsa-mir-4290	MIMAT0016921	HOXA13	3209	HITS-CLIP	23824327	Unspecified
	hsa-mir-4290	MIMAT0016921	HOXB8	3218	HITS-CLIP	19536157	Unspecified
	hsa-mir-4290	MIMAT0016921	HPR	3250	PAR-CLIP	22012620	Unspecified
	hsa-mir-4290	MIMAT0016921	KCNH1	3756	HITS-CLIP	19536157	Unspecified
	hsa-mir-4290	MIMAT0016921	SMAD3	4088	PAR-CLIP	22291592	Unspecified
	hsa-mir-4290	MIMAT0016921	MAP3K9	4293	HITS-CLIP	23824327	Unspecified
	hsa-mir-4290	MIMAT0016921	MMP17	4326	PAR-CLIP	20371350	Unspecified
	hsa-mir-4290	MIMAT0016921	2021-09-05	5413	HITS-CLIP	19536157	Unspecified
	hsa-mir-4290	MIMAT0016921	PRLR	5618	HITS-CLIP	23824327	Unspecified
	hsa-mir-4290	MIMAT0016921	RAB4A	5867	HITS-CLIP	23824327	Unspecified
	hsa-mir-4290	MIMAT0016921	RPL18A	6142	HITS-CLIP	23824327	Unspecified
	hsa-mir-4290	MIMAT0016921	SREBF1	6720	HITS-CLIP	19536157	Unspecified
	hsa-mir-4290	MIMAT0016921	EIF2B2	8892	HITS-CLIP	23313552	Unspecified
	hsa-mir-4290	MIMAT0016921	RGS6	9628	HITS-CLIP	19536157	Unspecified
	hsa-mir-4290	MIMAT0016921	CTIF	9811	HITS-CLIP	23824327	Unspecified
	hsa-mir-4290	MIMAT0016921	HS3ST1	9957	HITS-CLIP	23824327	Unspecified
[truncated: 502 more rows]
